# Supplementary material for: Antiplatelet regimens in the long-term secondary prevention of transient ischaemic attack and ischaemic stroke: an updated network meta-analysis
Source: PubMed Central journal article supplement — BMJ Open. 2016 Mar 17;6(3):e009013. doi: 10.1136/bmjopen-2015-009013 (PMC4800132; doi:10.1136/bmjopen-2015-009013), 2016-03-17

Supplementary appendix 5. Risk of bias of the included studies.

Judgements about each risk of bias item for each included study.

|                          |                                                           |   |   |   |   |
|--------------------------|-----------------------------------------------------------|---|---|---|---|
| 1977 ALTIA               | +                                                         | + | + | + | + |
| 1978 Canadian Coop       | +                                                         | + | + | + | + |
| 1982 Guiraud-Chaumeil    | -                                                         | - | - | - | - |
| 1983 AICLA               | +                                                         | + | + | + | + |
| 1983 Danish coop         | +                                                         | + | + | + | + |
| 1984 Tohji               | -                                                         | - | - | - | - |
| 1985 ACCSG               | +                                                         | + | + | + | + |
| 1987 Swedish Coop        | +                                                         | + | + | + | + |
| 1989 CATS                | +                                                         | + | + | + | + |
| 1989 TASS                | +                                                         | + | + | + | + |
| 1990 ESPS                | +                                                         | + | + | + | - |
| 1991 Dutch TIA           | +                                                         | + | + | + | + |
| 1991 SALT                | +                                                         | + | + | + | + |
| 1991 UK-TIA              | +                                                         | + | + | + | + |
| 1996 CAPRIE stroke       | +                                                         | + | + | + | + |
| 1996 ESPS2               | +                                                         | + | + | + | + |
| 1998 Alvarez Sabín       | -                                                         | - | - | - | - |
| 2000 CSPS                | +                                                         | + | + | + | + |
| 2003 AAASPS              | +                                                         | + | + | + | + |
| 2003 TOPALS              | +                                                         | + | - | - | - |
| 2003 TACIP               | +                                                         | + | - | - | - |
| 2004 TAPIRSS             | +                                                         | + | + | + | + |
| 2004 MATCH               | +                                                         | + | + | + | + |
| 2006 ESPRIT              | +                                                         | + | - | - | - |
| 2007 FASTER              | +                                                         | + | + | + | + |
| 2008 Fukuchi             | +                                                         | + | + | + | + |
| 2008 CASISP              | +                                                         | + | + | + | + |
| 2008 ProfESS             | +                                                         | + | + | + | + |
| 2009 Uehiyama Phase IIIa | +                                                         | + | + | + | + |
| 2010 CSPS2               | +                                                         | + | + | + | + |
| 2011 CHARISMA            | +                                                         | + | + | + | + |
| 2011 TOSS2               | +                                                         | + | + | + | + |
| 2011 CAIST               | +                                                         | + | + | + | + |
| 2011 JASAP               | +                                                         | + | + | + | + |
| 2012 SPSS3               | +                                                         | + | + | + | + |
| 2013 ECLIPse             | +                                                         | + | + | + | + |
|                          | Random sequence generation (selection bias)               |   |   |   |   |
|                          | Allocation concealment (selection bias)                   |   |   |   |   |
|                          | Blinding of participants and personnel (performance bias) |   |   |   |   |
|                          | Blinding of outcome assessment (detection bias)           |   |   |   |   |
|                          | Incomplete outcome data (attrition bias)                  |   |   |   |   |
|                          | Selective reporting (reporting bias)                      |   |   |   |   |

“+” indicates low risk of bias; “?” indicates unclear risk of bias; “-” indicates high risk of bias.

Supplementary appendix 5. Risk of bias of the included studies.

---

Judgements about each risk of bias item presented as percentages across all included studies.

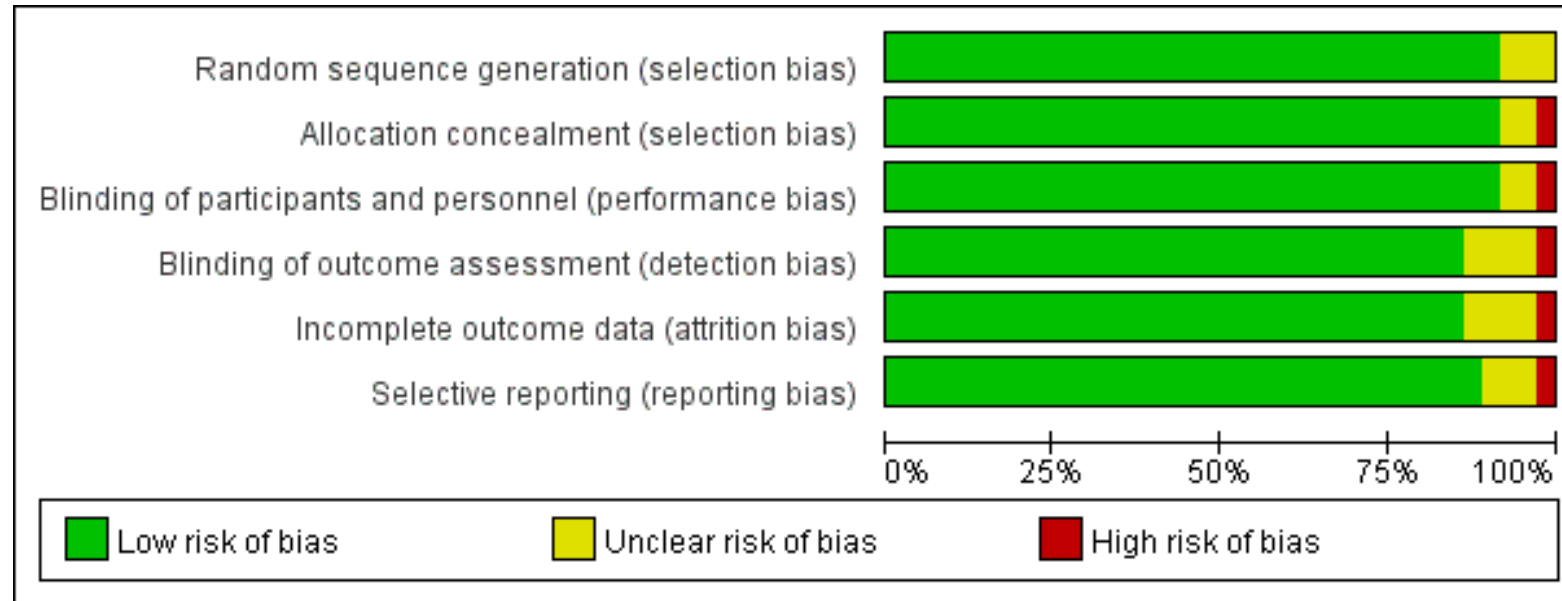

Supplement: bmjopen-2015-009013supp_appendix5.pdf [file bmjopen-2015-009013supp_appendix5.pdf]
