# Supplementary material for: Antiplatelet regimens in the long-term secondary prevention of transient ischaemic attack and ischaemic stroke: an updated network meta-analysis
Source: PubMed Central journal article supplement — BMJ Open. 2016 Mar 17;6(3):e009013. doi: 10.1136/bmjopen-2015-009013 (PMC4800132; doi:10.1136/bmjopen-2015-009013), 2016-03-17

## Supplementary appendix 10. Rankings of efficacy and safety of different regimens.

### Ranking of competing antiplatelet regimens for preventing serious vascular events

| Regimens                 | All trials(n=36) |                                     | Trials with low risk of bias(n=29)* |                                     | Allocation concealed(n=33) |                                     | Adjudication blinded(n=31)* |                                     | Attrition bias(n=31)* |                                     | Trials with ≥24 months of follow-up(n=19)† |                                     | Trials initiated after 1980(n=28) |                                     | A2=Aspirin 75-330 mg daily(n=36) |                                     |
|--------------------------|------------------|-------------------------------------|-------------------------------------|-------------------------------------|----------------------------|-------------------------------------|-----------------------------|-------------------------------------|-----------------------|-------------------------------------|--------------------------------------------|-------------------------------------|-----------------------------------|-------------------------------------|----------------------------------|-------------------------------------|
|                          | SUCRA (%)        | Median rank (95% credible interval) | SUCRA (%)                           | Median rank (95% credible interval) | SUCRA (%)                  | Median rank (95% credible interval) | SUCRA (%)                   | Median rank (95% credible interval) | SUCRA (%)             | Median rank (95% credible interval) | SUCRA (%)                                  | Median rank (95% credible interval) | SUCRA (%)                         | Median rank (95% credible interval) | SUCRA (%)                        | Median rank (95% credible interval) |
| Cilostazol               | 96               | 1(1-4)                              | 98                                  | 1(1-3)                              | 96                         | 1(1-4)                              | 98                          | 1(1-3)                              | 98                    | 1(1-4)                              | 94                                         | 1(1-5)                              | 96                                | 1(1-5)                              | 96                               | 1(1-4)                              |
| Aspirin plus clopidogrel | 80               | 3(2-8)                              | 84                                  | 5(1-7)                              | 81                         | 3(2-8)                              | 83                          | 3(2-7)                              | 82                    | 3(1-7)                              | 69                                         | 4(1-10)                             | 78                                | 4(2-8)                              | 78                               | 4(2-8)                              |
| AD2                      | 77               | 4(1-10)                             | 70                                  | 4(1-12)                             | 81                         | 3(1-9)                              | 81                          | 3(1-8)                              | 81                    | 3(1-8)                              | 57                                         | 6(1-13)                             | 80                                | 3(1-11)                             | 77                               | 4(1-9)                              |
| AD1                      | 74               | 4(2-8)                              | 73                                  | 4(2-9)                              | 75                         | 4(2-8)                              | 72                          | 4(2-9)                              | 76                    | 4(2-7)                              | 84                                         | 3(1-6)                              | 73                                | 5(2-9)                              | 72                               | 4(2-8)                              |
| Clopidogrel              | 67               | 5(3-10)                             | 68                                  | 5(2-9)                              | 68                         | 5(3-9)                              | 67                          | 5(3-9)                              | 69                    | 5(2-9)                              | 82                                         | 3(1-8)                              | 65                                | 6(3-10)                             | 65                               | 5(3-9)                              |
| Ticlopidine              | 50               | 8(3-13)                             | 47                                  | 8(3-13)                             | 48                         | 8(3-13)                             | 48                          | 8(3-12)                             | 46                    | 8(3-13)                             | 50                                         | 7(3-12)                             | 48                                | 8(3-13)                             | 50                               | 8(3-12)                             |
| Aspirin plus ticlopidine | 46               | 10(1-15)                            | —                                   | —                                   | 45                         | 10(1-15)                            | —                           | —                                   | —                     | —                                   | —                                          | —                                   | 46                                | 10(1-15)                            | 48                               | 8(1-14)                             |
| Triflusal                | 46               | 9(2-14)                             | 32                                  | 11(3-14)                            | 33                         | 11(3-15)                            | 32                          | 11(3-14)                            | 32                    | 11(3-14)                            | 46                                         | 7(2-13)                             | 47                                | 8(2-14)                             | 46                               | 8(2-13)                             |
| A4                       | 43               | 9(4-13)                             | 42                                  | 9(4-12)                             | 45                         | 9(4-13)                             | 45                          | 8(4-12)                             | 42                    | 9(4-13)                             | 32                                         | 9(5-12)                             | 46                                | 9(3-13)                             | 41                               | 9(4-12)                             |
| A2                       | 39               | 10(5-13)                            | 53                                  | 7(3-12)                             | 41                         | 9(5-13)                             | 50                          | 7(3-12)                             | 42                    | 9(4-13)                             | 37                                         | 9(5-12)                             | 39                                | 10(5-14)                            | 36                               | 9(6-12)                             |
| A3                       | 36               | 10(6-13)                            | 38                                  | 9(5-12)                             | 39                         | 10(6-13)                            | 37                          | 9(6-12)                             | 38                    | 9(6-12)                             | 29                                         | 10(6-12)                            | 37                                | 10(6-13)                            | —                                | —                                   |
| A1                       | 33               | 11(6-14)                            | 34                                  | 10(10-13)                           | 34                         | 10(6-14)                            | 32                          | 10(5-13)                            | 34                    | 10(5-13)                            | 36                                         | 9(4-12)                             | 33                                | 11(6-14)                            | 32                               | 10(6-13)                            |
| Aspirin plus cilostazol  | 28               | 14(1-15)                            | 27                                  | 13(1-14)                            | 27                         | 14(1-15)                            | 23                          | 14(1-14)                            | 27                    | 14(1-14)                            | —                                          | —                                   | 30                                | 14(1-15)                            | 28                               | 13(1-14)                            |
| Dipyridamole             | 26               | 12(6-15)                            | 26                                  | 11(5-14)                            | 28                         | 12(6-14)                            | 25                          | 11(6-14)                            | 27                    | 11(5-14)                            | 31                                         | 9(4-13)                             | 26                                | 12(6-15)                            | 25                               | 11(6-14)                            |
| Placebo                  | 8                | 14(12-15)                           | 7                                   | 13(11-14)                           | 9                          | 14(12-15)                           | 7                           | 13(11-14)                           | 7                     | 13(11-14)                           | 3                                          | 13(11-13)                           | 8                                 | 14(12-15)                           | 8                                | 13(11-14)                           |

A1, aspirin 30-50 mg daily; A2, aspirin 75-162 mg daily; A3, aspirin 283-330 mg daily; A4, aspirin 500-1500 mg daily; AD1, aspirin 50 mg plus dipyridamole 400 mg daily; AD2, aspirin 990-1300 mg plus dipyridamole 150-300 mg daily; \*study that investigated regimen of aspirin plus ticlopidine was excluded; † studies that investigated regimens of aspirin plus ticlopidine and aspirin plus cilostazol were excluded; SUCRA, surface under the cumulative ranking curve; SUCRA would be 1 when a treatment is certain to be the best and 0 when a treatment is certain to be the worst.

## Supplementary appendix 10. Rankings of efficacy and safety of different regimens.

### Ranking of competing antiplatelet regimens for preventing stroke

| Regimens                 | All trials(n=33) |                                     | Trials with low risk of bias(n=27)* |                                     | Allocation concealed(n=31) |                                     | Adjudication blinded(n=29)* |                                     | Attrition bias(n=29)* |                                     | Trials with ≥24 months of follow-up(n=19)† |                                     | Trials initiated after 1980(n=28) |                                     | A2=Aspirin 75-330 mg daily(n=33) |                                     |
|--------------------------|------------------|-------------------------------------|-------------------------------------|-------------------------------------|----------------------------|-------------------------------------|-----------------------------|-------------------------------------|-----------------------|-------------------------------------|--------------------------------------------|-------------------------------------|-----------------------------------|-------------------------------------|----------------------------------|-------------------------------------|
|                          | SUCRA (%)        | Median rank (95% credible interval) | SUCRA (%)                           | Median rank (95% credible interval) | SUCRA (%)                  | Median rank (95% credible interval) | SUCRA (%)                   | Median rank (95% credible interval) | SUCRA (%)             | Median rank (95% credible interval) | SUCRA (%)                                  | Median rank (95% credible interval) | SUCRA (%)                         | Median rank (95% credible interval) | SUCRA (%)                        | Median rank (95% credible interval) |
| Cilostazol               | 94               | 2(1-5)                              | 97                                  | 1(1-4)                              | 94                         | 2(1-5)                              | 97                          | 1(1-4)                              | 97                    | 1(1-4)                              | 92                                         | 1(1-6)                              | 92                                | 2(1-6)                              | 94                               | 2(1-5)                              |
| AD2                      | 78               | 3(1-10)                             | 70                                  | 4(1-13)                             | 79                         | 3(1-10)                             | 81                          | 3(1-9)                              | 81                    | 3(1-9)                              | 62                                         | 5(1-12)                             | 78                                | 3(1-12)                             | 78                               | 3(1-9)                              |
| Aspirin plus clopidogrel | 73               | 4(2-10)                             | 78                                  | 3(1-9)                              | 75                         | 4(2-9)                              | 77                          | 3(1-9)                              | 77                    | 4(1-9)                              | 64                                         | 5(1-11)                             | 72                                | 5(2-10)                             | 72                               | 4(2-9)                              |
| Clopidogrel              | 65               | 5(2-12)                             | 66                                  | 5(2-11)                             | 67                         | 5(2-11)                             | 66                          | 5(2-11)                             | 69                    | 5(2-11)                             | 80                                         | 3(1-9)                              | 63                                | 6(2-12)                             | 64                               | 5(2-11)                             |
| AD1                      | 65               | 6(2-11)                             | 63                                  | (2-11)                              | 66                         | 6(2-11)                             | 62                          | 6(2-11)                             | 69                    | 5(2-10)                             | 79                                         | 3(1-7)                              | 62                                | 6(2-12)                             | 64                               | 6(2-10)                             |
| Aspirin plus ticlopidine | 63               | 4(1-15)                             | —                                   | —                                   | 63                         | 3(1-15)                             | —                           | —                                   | —                     | —                                   | —                                          | —                                   | 64                                | 3(1-15)                             | 64                               | 3(1-14)                             |
| Triflusal                | 59               | 6(1-14)                             | 46                                  | 8(2-14)                             | 44                         | 9(2-15)                             | 46                          | 8(2-14)                             | 44                    | 8(2-14)                             | 59                                         | 6(1-13)                             | 59                                | 6(1-14)                             | 58                               | 6(2-13)                             |
| Ticlopidine              | 44               | 9(3-14)                             | 45                                  | 8(3-13)                             | 45                         | 9(3-13)                             | 46                          | 8(3-13)                             | 45                    | 8(3-13)                             | 51                                         | 7(2-12)                             | 46                                | 9(3-14)                             | 43                               | 9(3-13)                             |
| A2                       | 42               | 9(4-13)                             | 54                                  | 7(2-12)                             | 43                         | 9(4-13)                             | 51                          | 7(3-12)                             | 45                    | 8(4-12)                             | 35                                         | 9(5-13)                             | 42                                | 9(4-14)                             | 40                               | 9(5-12)                             |
| A3                       | 41               | 9(4-14)                             | 45                                  | 8(3-13)                             | 43                         | 9(4-14)                             | 45                          | 8(3-13)                             | 43                    | 8(3-13)                             | 20                                         | 11(6-13)                            | 41                                | 9(4-14)                             | —                                | —                                   |
| A4                       | 35               | 10(5-14)                            | 34                                  | 10(4-13)                            | 36                         | 10(5-14)                            | 37                          | 9(4-13)                             | 33                    | 10(5-13)                            | 36                                         | 9(4-13)                             | 39                                | 10(3-14)                            | 34                               | 10(5-13)                            |
| A1                       | 29               | 11(4-15)                            | 31                                  | 11(3-14)                            | 30                         | 11(4-15)                            | 29                          | 11(4-14)                            | 31                    | 10(4-14)                            | 34                                         | 9(4-13)                             | 29                                | 12(4-15)                            | 29                               | 11(4-14)                            |
| Aspirin plus cilostazol  | 28               | 14(1-15)                            | 31                                  | 13(1-14)                            | 30                         | 14(1-15)                            | 30                          | 13(1-14)                            | 30                    | 13(1-14)                            | —                                          | —                                   | 28                                | 14(1-15)                            | 28                               | 13(1-14)                            |
| Dipyridamole             | 26               | 12(5-15)                            | 28                                  | 11(3-14)                            | 27                         | 12(5-15)                            | 26                          | 11(4-14)                            | 28                    | 11(4-14)                            | 33                                         | 9(4-13)                             | 26                                | 12(4-15)                            | 25                               | 11(5-14)                            |
| Placebo                  | 8                | 14(11-15)                           | 11                                  | 13(9-14)                            | 9                          | 14(11-15)                           | 9                           | 13(1-14)                            | 9                     | 13(10-14)                           | 5                                          | 13(10-13)                           | 10                                | 14(1-15)                            | 8                                | 13(11-14)                           |

A1, aspirin 30-50 mg daily; A2, aspirin 75-162 mg daily; A3, aspirin 283-330 mg daily; A4, aspirin 500-1500 mg daily; AD1, aspirin 50 mg plus dipyridamole 400 mg daily; AD2, aspirin 990-1300 mg plus dipyridamole 150-300 mg daily; \* study that investigated regimen of aspirin plus ticlopidine was excluded; † studies that investigated regimens of aspirin plus ticlopidine and aspirin plus cilostazol were excluded; SUCRA, surface under the cumulative ranking curve; SUCRA would be 1 when a treatment is certain to be the best and 0 when a treatment is certain to be the worst.

## Supplementary appendix 10. Rankings of efficacy and safety of different regimens.

| Ranking of competing antiplatelet regimens for risk of any bleeding |                   |                                     |                                     |                                     |                            |                                     |                             |                                     |                       |                                     |                                            |                                     |                                    |                                     |                                  |                                     |
|---------------------------------------------------------------------|-------------------|-------------------------------------|-------------------------------------|-------------------------------------|----------------------------|-------------------------------------|-----------------------------|-------------------------------------|-----------------------|-------------------------------------|--------------------------------------------|-------------------------------------|------------------------------------|-------------------------------------|----------------------------------|-------------------------------------|
| Regimens                                                            | All trials (n=30) |                                     | Trials with low risk of bias(n=26)* |                                     | Allocation concealed(n=29) |                                     | Adjudication blinded(n=27)* |                                     | Attrition bias(n=29)* |                                     | Trials with ≥24 months of follow-up(n=19)† |                                     | Trials initiated after 1980(n=25)‡ |                                     | A2=Aspirin 75-330 mg daily(n=33) |                                     |
|                                                                     | SUCRA (%)         | Median rank (95% credible interval) | SUCRA (%)                           | Median rank (95% credible interval) | SUCRA (%)                  | Median rank (95% credible interval) | SUCRA (%)                   | Median rank (95% credible interval) | SUCRA (%)             | Median rank (95% credible interval) | SUCRA (%)                                  | Median rank (95% credible interval) | SUCRA (%)                          | Median rank (95% credible interval) | SUCRA (%)                        | Median rank (95% credible interval) |
| Placebo                                                             | 91                | 2(1-4)                              | 92                                  | 2(1-4)                              | 92                         | 2(1-4)                              | 92                          | 2(1-4)                              | 92                    | 2(1-4)                              | 89                                         | 2(1-4)                              | 91                                 | 2(1-4)                              | 91                               | 2(1-4)                              |
| Dipyridamole                                                        | 91                | 2(1-5)                              | 90                                  | 2(1-5)                              | 91                         | 2(1-5)                              | 91                          | 2(1-5)                              | 91                    | 2(1-5)                              | 91                                         | 2(1-4)                              | 90                                 | 2(1-5)                              | 91                               | 2(1-5)                              |
| Cilostazol                                                          | 81                | 4(1-7)                              | 82                                  | 3(1-6)                              | 82                         | 3(1-7)                              | 83                          | 3(1-6)                              | 82                    | 3(1-6)                              | 89                                         | 2(1-6)                              | 80                                 | 4(1-7)                              | 80                               | 4(1-6)                              |
| Triflusal                                                           | 81                | 4(1-7)                              | 78                                  | 4(1-7)                              | 78                         | 4(1-8)                              | 78                          | 4(1-7)                              | 78                    | 4(1-7)                              | 73                                         | 4(1-8)                              | 80                                 | 4(1-7)                              | 79                               | 4(1-7)                              |
| A1                                                                  | 60                | 6(4-11)                             | 59                                  | 6(4-10)                             | 61                         | 6(4-10)                             | 60                          | 6(4-10)                             | 60                    | 6(4-10)                             | 59                                         | 6(4-9)                              | 58                                 | 6(4-10)                             | 58                               | 6(4-10)                             |
| Clopidogrel                                                         | 55                | 7(4-12)                             | 54                                  | 7(4-12)                             | 56                         | 7(4-12)                             | 55                          | 7(4-11)                             | 55                    | 7(4-11)                             | 59                                         | 6(3-11)                             | 53                                 | 7(4-11)                             | 53                               | 7(4-11)                             |
| AD1                                                                 | 46                | 8(6-12)                             | 42                                  | 8(6-12)                             | 47                         | 8(5-12)                             | 43                          | 8(6-12)                             | 45                    | 8(5-12)                             | 52                                         | 7(4-10)                             | 44                                 | 8(5-12)                             | 44                               | 8(6-11)                             |
| Aspirin plus cilostazol                                             | 45                | 9(1-15)                             | 45                                  | 9(1-14)                             | 43                         | 10(1-15)                            | 45                          | 9(1-14)                             | 43                    | 10(1-14)                            | —                                          | —                                   | 42                                 | 10(1-14)                            | 43                               | 9(1-14)                             |
| Ticlopidine                                                         | 43                | 9(5-13)                             | 44                                  | 8(4-12)                             | 43                         | 9(5-13)                             | 41                          | 9(4-12)                             | 44                    | 8(4-12)                             | 32                                         | 9(5-12)                             | 41                                 | 9(5-12)                             | 40                               | 9(5-12)                             |
| Aspirin plus ticlopidine                                            | 42                | 10(1-15)                            | —                                   | —                                   | 41                         | 10(1-15)                            | —                           | —                                   | —                     | —                                   | —                                          | —                                   | 41                                 | 9(1-14)                             | 41                               | 10(1-14)                            |
| AD2                                                                 | 33                | 11(5-14)                            | 33                                  | 10(4-13)                            | 32                         | 11(4-14)                            | 31                          | 11(4-13)                            | 33                    | 10(4-13)                            | 31                                         | 10(4-12)                            | —                                  | —                                   | 30                               | 11(5-13)                            |
| A3                                                                  | 32                | 11(7-14)                            | 30                                  | 10(6-13)                            | 32                         | 11(7-14)                            | 31                          | 10(6-13)                            | 30                    | 10(7-13)                            | 28                                         | 10(7-12)                            | 30                                 | 10(7-13)                            | —                                | —                                   |
| A2                                                                  | 29                | 11(8-14)                            | 29                                  | 10(7-13)                            | 29                         | 11(8-14)                            | 31                          | 10(7-13)                            | 26                    | 11(8-13)                            | 26                                         | 10(7-12)                            | 27                                 | 11(7-13)                            | 28                               | 10(8-13)                            |
| A4                                                                  | 20                | 12(8-14)                            | 21                                  | 12(7-13)                            | 20                         | 12(8-14)                            | 19                          | 12(8-13)                            | 21                    | 12(7-13)                            | 20                                         | 11(7-12)                            | 20                                 | 12(7-13)                            | 19                               | 12(9-13)                            |
| Aspirin plus clopidogrel                                            | 2                 | 15(14-15)                           | 1                                   | 14(13-14)                           | 2                          | 15(14-15)                           | 1                           | 14(13-14)                           | 1                     | 14(13-14)                           | 0                                          | 13(12-13)                           | 2                                  | 14(13-14)                           | 2                                | 14(13-14)                           |

A1, aspirin 30-50 mg daily; A2, aspirin 75-162 mg daily; A3, aspirin 283-330 mg daily; A4, aspirin 500-1500 mg daily; AD1, aspirin 50 mg plus dipyridamole 400 mg daily; AD2, aspirin 990-1300 mg plus dipyridamole 150-300 mg daily; \* study that investigated regimen of aspirin plus ticlopidine was excluded; † studies that investigated regimens of aspirin plus ticlopidine and aspirin plus cilostazol were excluded; ‡ studies that investigated regimens of AD2 were excluded; SUCRA, surface under the cumulative ranking curve; SUCRA would be 1 when a treatment is certain to be the best and 0 when a treatment is certain to be the worst.

## Supplementary appendix 10. Rankings of efficacy and safety of different regimens.

**Rankograms of the 15 antiplatelet regimens for preventing serious vascular events (main analysis).** On the horizontal axis are the 15 possible ranks and on the vertical axis the probability of a regimen to achieve each rank.

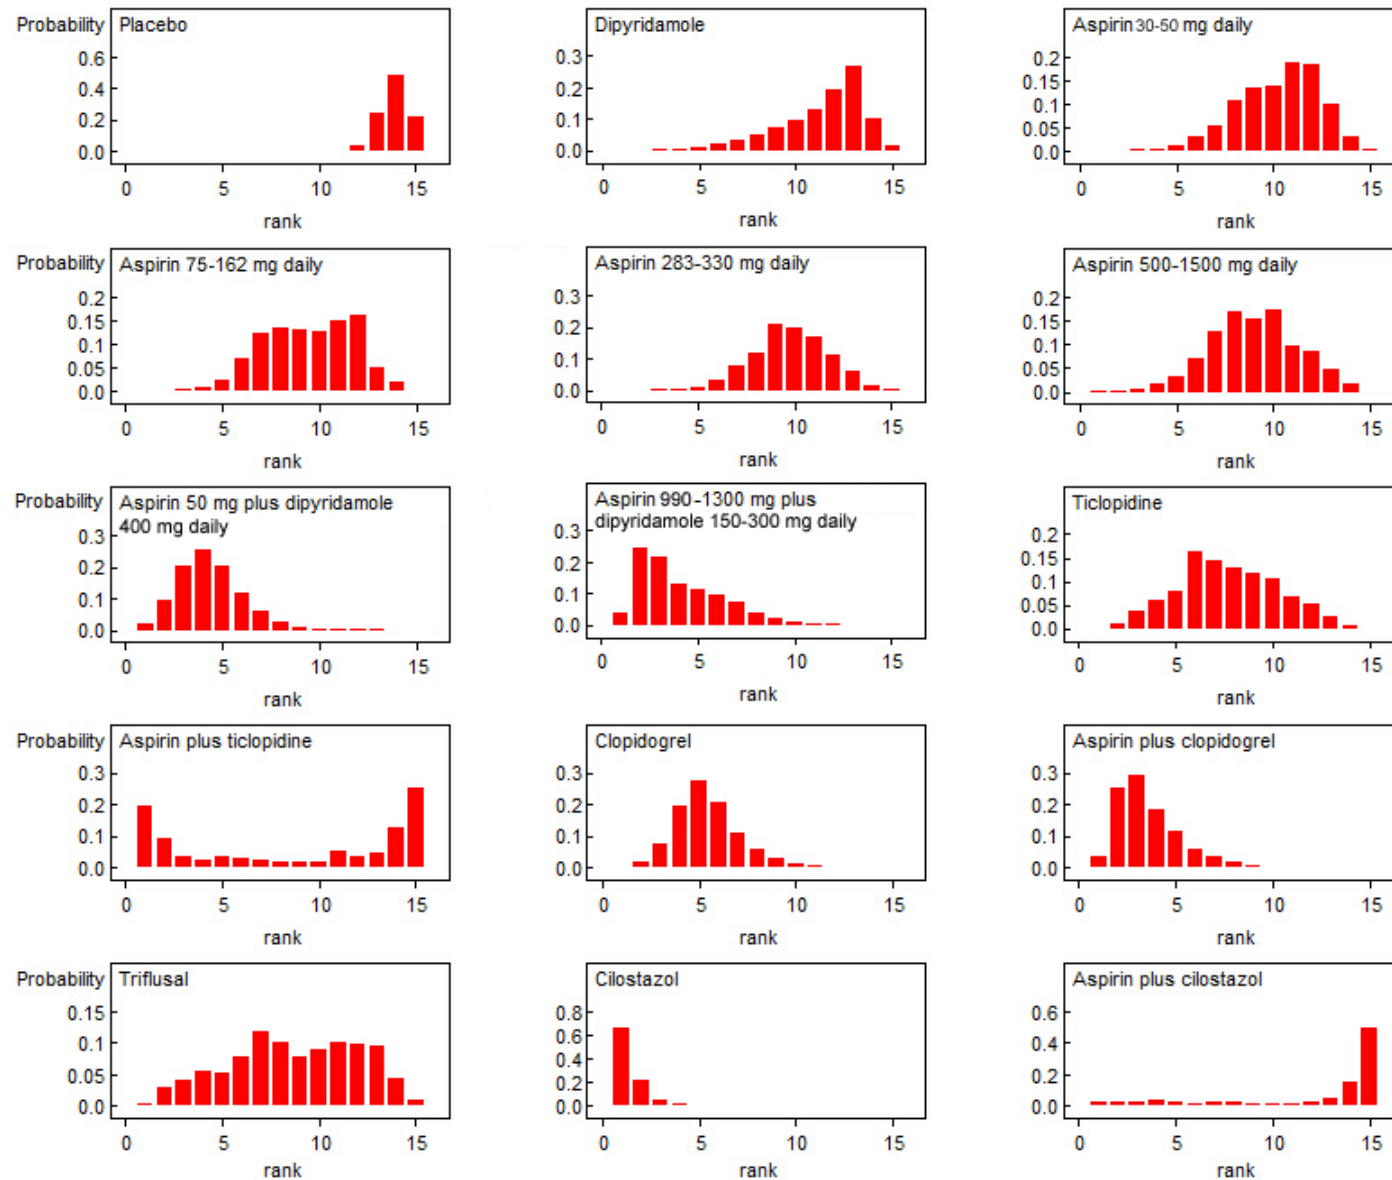

## Supplementary appendix 10. Rankings of efficacy and safety of different regimens.

**Rankograms of the 15 antiplatelet regimens for preventing recurrent stroke (main analysis).** On the horizontal axis are the 15 possible ranks and on the vertical axis the probability of a regimen to achieve each rank.

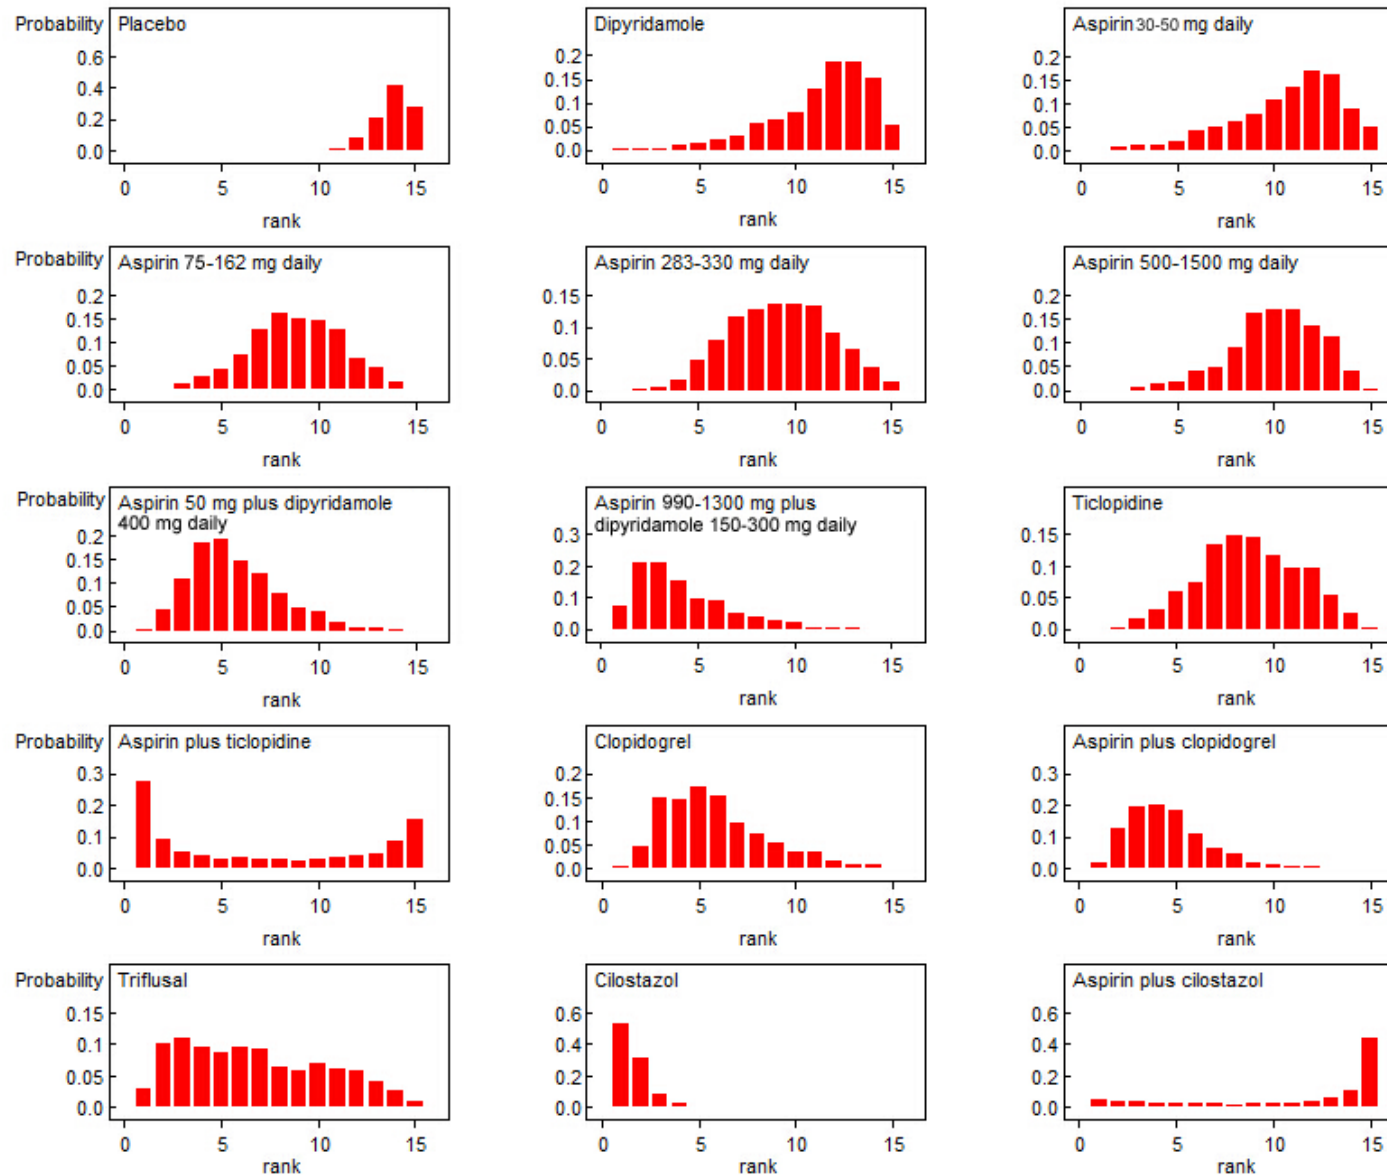

## Supplementary appendix 10. Rankings of efficacy and safety of different regimens.

**Rankograms of the 15 antiplatelet regimens for risk of any bleeding (main analysis).** On the horizontal axis are the 15 possible ranks and on the vertical axis the probability of a regimen to achieve each rank.

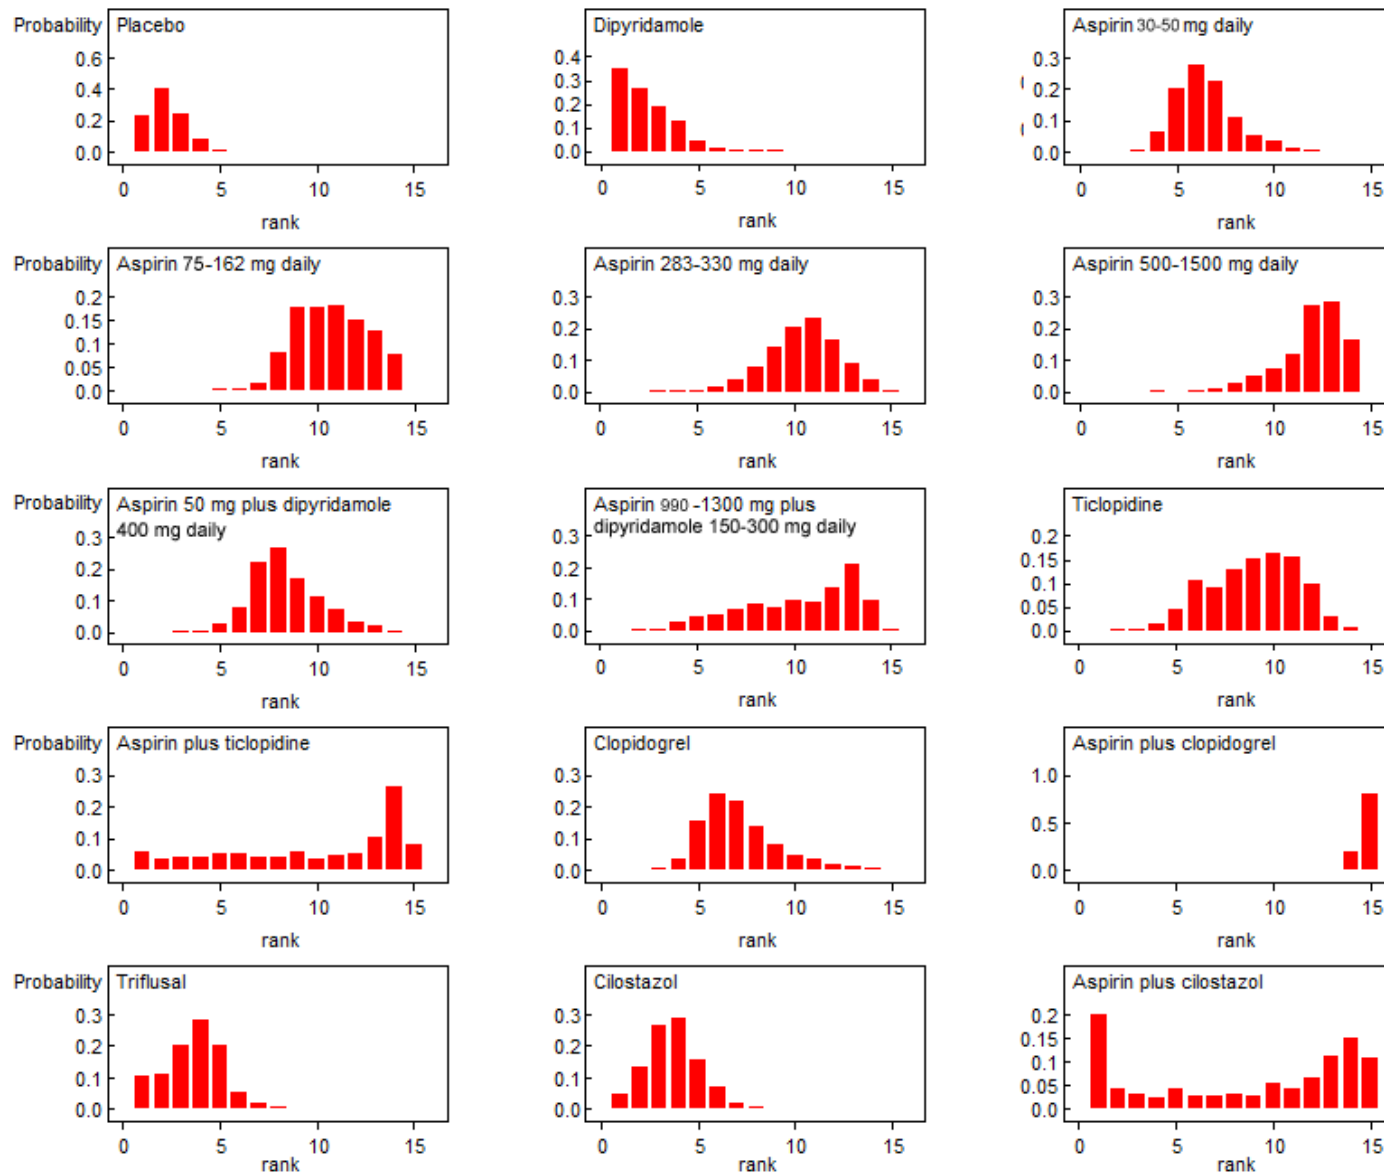

Supplement: bmjopen-2015-009013supp_appendix10.pdf [file bmjopen-2015-009013supp_appendix10.pdf]
