# Supplementary material for: Antiplatelet regimens in the long-term secondary prevention of transient ischaemic attack and ischaemic stroke: an updated network meta-analysis
Source: PubMed Central journal article supplement — BMJ Open. 2016 Mar 17;6(3):e009013. doi: 10.1136/bmjopen-2015-009013 (PMC4800132; doi:10.1136/bmjopen-2015-009013), 2016-03-17
Supplement: bmjopen-2015-009013supp_appendix1.pdf [file bmjopen-2015-009013supp_appendix1.pdf]

## Supplementary appendix 1. Strategy for searching articles for this review.

---

### Strategy for searching articles for this review.

---

#### PubMed:

("Cerebrovascular Disorders"[Mesh] OR "Stroke"[Mesh] OR "Brain Infarction"[Mesh] OR "Ischemic Attack, Transient"[Mesh] OR stroke\*[Title/Abstract] OR poststroke\*[Title/Abstract] OR poststroke\*[Title/Abstract] OR cerebrovasc\*[Title/Abstract] OR cerebral vasc\*[Title/Abstract] OR brain vasc\*[Title/Abstract] OR CVA[Title/Abstract] OR transient ischemic attack\*[Title/Abstract] OR transient ischaemic attack\*[Title/Abstract] OR TIA[Title/Abstract] OR brain infarct\*[Title/Abstract] OR brain ischemi\*[Title/Abstract] OR brain ischaemi\*[Title/Abstract] ischemic attack\*[Title/Abstract] OR ischaemic attack\*[Title/Abstract] OR ischemic stroke[Title/Abstract] OR ischaemic stroke[Title/Abstract] OR cerebral infarct\*[Title/Abstract] OR apoplexy[Title/Abstract]) AND (aspirin[Mesh] OR aspirin[Title/Abstract] OR aspirin[Title/Abstract] OR acetylsalicylic acid[Title/Abstract] OR acetyl salicylic acid[Title/Abstract] OR acetosalicylic acid[Title/Abstract] OR clopidogrel[Title/Abstract] OR plavix[Title/Abstract] OR iscover[Title/Abstract] OR "ticlopidine"[Mesh] OR ticlopidine[Title/Abstract] OR ticlid[Title/Abstract] OR tiklid[Title/Abstract] OR tiklyd[Title/Abstract] OR ticlodone[Title/Abstract] OR "thienopyridines"[Mesh] OR thienopyridine\*[Title/Abstract] OR "dipyridamole"[Mesh] OR dipyridamol\*[Title/Abstract] OR persantin\*[Title/Abstract] OR curantyl[Title/Abstract] OR curantil[Title/Abstract] OR antistenocardin[Title/Abstract] OR cilostazol[Title/Abstract] OR pletal[Title/Abstract] OR pletaal[Title/Abstract] OR OPC-13013[Title/Abstract] OR OPC 13013[Title/Abstract] OR OPC-21[Title/Abstract] OR OPC 21[Title/Abstract] OR triflusal[Title/Abstract] OR disgren[Title/Abstract] OR tecnosal[Title/Abstract] OR triflux[Title/Abstract] OR aflen[Title/Abstract] OR ur-1501[Title/Abstract]) AND "humans"[MeSH Terms] NOT Review[ptyp] NOT Case Reports[ptyp] NOT comment[ptyp]

---

#### EMBASE:

('cerebrovascular disorders'/exp OR 'stroke'/exp OR 'brain infarction'/exp OR 'ischemic attack, transient'/exp OR stroke\*:ab,ti OR poststroke\*:ab,ti OR cerebrovasc\*:ab,ti OR 'cerebral vascular':ab,ti OR 'brain vascular':ab,ti OR cva:ab,ti OR 'transient ischemic attack':ab,ti OR 'transient ischaemic attack':ab,ti OR tia:ab,ti OR 'brain infarction':ab,ti OR 'brain ischemia':ab,ti OR 'brain ischaemia':ab,ti OR 'ischemic attack':ab,ti OR 'ischaemic attack':ab,ti OR 'ischemic stroke':ab,ti OR 'ischaemic stroke':ab,ti OR 'cerebral infarction':ab,ti OR 'apoplexy':ab,ti) AND ('aspirin'/exp OR 'aspirin':ab,ti OR 'acetylsalicylic acid':ab,ti OR 'acetyl salicylic acid':ab,ti OR 'acetosalicylic acid':ab,ti OR 'clopidogrel'/exp OR 'clopidogrel':ab,ti OR 'plavix':ab,ti OR 'iscover':ab,ti OR 'ticlopidine'/exp OR 'ticlopidine':ab,ti OR 'ticlid':ab,ti OR 'tiklid':ab,ti OR 'tiklyd':ab,ti OR 'ticlodone':ab,ti OR 'ticlodix':ab,ti OR 'thienopyridines'/exp OR thienopyridine\*:ab,ti OR 'dipyridamole'/exp OR dipyridamol\*:ab,ti OR persantin\*:ab,ti OR curantyl:ab,ti OR curantil:ab,ti OR antistenocardin:ab,ti OR 'cilostazol'/exp OR pletal:ab,ti OR pletaal:ab,ti OR 'OPC-13013':ab,ti OR 'OPC 13013':ab,ti OR 'OPC-21':ab,ti OR 'OPC 21':ab,ti OR 'triflusal'/exp OR disgren:ab,ti OR tecnosal:ab,ti OR triflux:ab,ti OR aflen:ab,ti OR 'ur-1501':ab,ti) AND [humans]/lim AND ([article]/lim OR [article in press]/lim OR [conference abstract]/lim OR [conference paper]/lim) AND ('clinical article'/de OR 'clinical trial'/de OR 'controlled clinical trial'/de OR 'controlled study'/de OR 'major clinical study'/de OR 'randomized controlled trial'/de OR 'randomized controlled trial (topic)'/de OR 'multicenter study'/de)

---

## Supplementary appendix 1. Strategy for searching articles for this review.

---

### Cochrane Central Register of Controlled Trials:

- #1, [Cerebrovascular Disorders] explode all trees  
#2, [Stroke] explode all trees  
#3, [Brain Infarction] explode all trees  
#4, [Ischemic Attack, Transient] explode all trees  
#5, poststroke\*:ti,ab,kw  
#6, cerebrovasc\*:ti,ab,kw  
#7, cerebral vasc\*:ti,ab,kw  
#8, brain vasc\*:ti,ab,kw  
#9, "CVA":ti,ab,kw  
#10, transient ischemic attack\*:ti,ab,kw  
#11, transient ischaemic attack\*:ti,ab,kw  
#12, "TIA":ti,ab,kw  
#13, brain infarct\*:ti,ab,kw  
#14, brain ischemi\*:ti,ab,kw  
#15, brain ischaemi\*:ti,ab,kw  
#16, ischemic attack\*:ti,ab,kw  
#17, ischaemic attack\*:ti,ab,kw  
#18, "ischemic stroke":ti,ab,kw  
#19, "ischaemic stroke":ti,ab,kw  
#20, cerebral infarct\*:ti,ab,kw  
#21, "apoplexy":ti,ab,kw  
# 22, #1 or #2 or #3 or #4 or #5 #6 or #7 or #8 or #9  
or #10 or #11 or #12 or #13 or #14 or #15 or #16 or  
#17 or #18 or #19 or #20 or #21  
#23, [Aspirin] explode all trees  
#24, "aspirin":ti,ab,kw  
#25, "acetylsalicylic acid":ti,ab,kw  
#26, "acetyl salicylic acid":ti,ab,kw  
#27, "acetosalicylic acid":ti,ab,kw  
#28, "clopidogrel":ti,ab,kw  
#29, "plavix":ti,ab,kw  
#30, "iscover":ti,ab,kw  
#31, [Ticlopidine] explode all trees  
#32, "ticlopidine":ti,ab,kw  
#33, "ticlid":ti,ab,kw  
#34, "tiklid":ti,ab,kw  
#35, "tiklyd":ti,ab,kw  
#36, "ticlodone":ti,ab,kw  
#37, thienopyridine\*:ti,ab,kw  
#38, [Thienopyridines] explode all trees  
#39, [Dipyridamole] explode all trees  
#40, dipyridamol\*:ti,ab,kw  
#41, persantin\*:ti,ab,kw  
#42, "curantyl":ti,ab,kw  
#43, "curantil":ti,ab,kw  
#44, "antistenocardin":ti,ab,kw  
#45, "antistenocardin":ti,ab,kw  
#46, "cilostazol":ti,ab,kw  
#47, "pletal":ti,ab,kw  
#48, "pletaal":ti,ab,kw  
#49, "OPC-13013":ti,ab,kw  
#50, "OPC 13013":ti,ab,kw  
#51, "OPC-21":ti,ab,kw  
#52, "OPC 21":ti,ab,kw  
#53, "triflusal":ti,ab,kw  
#54, "disgren":ti,ab,kw  
#55, "tecnosal":ti,ab,kw  
#56, "triflux":ti,ab,kw  
#57, "aflen":ti,ab,kw  
#58, "ur-1501":ti,ab,kw  
#59, #23 or #24 or #25 or #26 or #27 or #28 or #29 or  
#30 or #31 or #32 or #33 or #34 or #35 or #36 or #37  
or #38 or #39 or #40 or #41 or #42 or #43 or #44 or  
#45 or #46 or #47 or #48 or #49 or #50 or #51 or #52  
or #53 or #54 or #55 or #56 or #57 or #58  
#60, #22 and #59
- 

### ClinicalTrials.gov and Google Scholar:

**Conditions:** ischemic stroke, ischaemic stroke, stroke, cerebral infarction, brain infarction, apoplexy, transient ischemic attack, transient ischaemic attack, and TIA

**Treatments:** aspirin, acetylsalicylic acid, acetyl salicylic acid, clopidogrel, plavix, ticlopidine, thienopyridine, dipyridamole, persantine, cilostazol, and triflusal

The search algorithm combined the categories for 'conditions' and 'treatments'.

---
