# Supplementary material for: Antiplatelet regimens in the long-term secondary prevention of transient ischaemic attack and ischaemic stroke: an updated network meta-analysis
Source: PubMed Central journal article supplement — BMJ Open. 2016 Mar 17;6(3):e009013. doi: 10.1136/bmjopen-2015-009013 (PMC4800132; doi:10.1136/bmjopen-2015-009013), 2016-03-17
Supplement: bmjopen-2015-009013supp_appendix2.pdf [file bmjopen-2015-009013supp_appendix2.pdf]

## Supplementary appendix 2. The WinBUGS code for random effects model.

---

### The WinBUGS code for random effects model.

```
# Binomial likelihood, cloglog link
# Random effects model for multi-arm trials
model{
    # *** ROGRAM STARTS
    for(i in 1:ns){
        # LOOP THROUGH STUDIES
        w[i,1] <- 0 # adjustment for multi-arm trials is zero for control arm
        delta[i,1] <- 0 # treatment effect is zero for control arm
        mu[i] ~ dnorm(0,.0001) # vague priors for all trial baselines
        for (k in 1:na[i]) {
            # LOOP THROUGH ARMS
            r[i,k] ~ dbin(p[i,k],n[i,k]) # Binomial likelihood
# model for linear predictor
            cloglog(p[i,k]) <- log(time[i]) + mu[i] + delta[i,k]
            rhat[i,k] <- p[i,k] * n[i,k] # expected value of the numerators
#Deviance contribution
            dev[i,k] <- 2 * (r[i,k] * (log(r[i,k])-log(rhat[i,k]))
                + (n[i,k]-r[i,k]) * (log(n[i,k]-r[i,k]) - log(n[i,k]-rhat[i,k])))
# summed residual deviance contribution for this trial
            resdev[i] <- sum(dev[i,1:na[i]])
            for (k in 2:na[i]) {
                # LOOP THROUGH ARMS
# trial-specific LOR distributions
                delta[i,k] ~ dnorm(md[i,k],taud[i,k])
# mean of LOR distributions, with multi-arm trial correction
                md[i,k] <- d[t[i,k]] - d[t[i,1]] + sw[i,k]
# precision of LOR distributions (with multi-arm trial correction)
                taud[i,k] <- tau *2*(k-1)/k
# adjustment, multi-arm RCTs
                w[i,k] <- (delta[i,k] - d[t[i,k]] + d[t[i,1]])
# cumulative adjustment for multi-arm trials
                sw[i,k] <- sum(w[i,1:k-1])/(k-1)
            }
        }
    }
    totresdev <- sum(resdev[]) #Total Residual Deviance
    d[1]<-0 # treatment effect is zero for reference treatment
# vague priors for treatment effects
    for (k in 2:nt){ d[k] ~ dnorm(0,.0001) }
    sd ~ dunif(0,2) # vague prior for between-trial SD
    tau <- pow(sd,-2) # between-trial precision = (1/between-trial variance)

    for (c in 1:(nt -1)) {
        for (k in (c+1):nt) {
            or[c,k] <- exp(d[k] - d[c])
            lor[c,k] <- (d[k] -d[c])
        }
    }
}
```

## Supplementary appendix 2. The WinBUGS code for random effects model.

---

```
}
#Ranking of treatments#

  for(k in 1:nt) {
    order[k]<- rank(d[,k])
# this is when the outcome is positive - omit 'nt+1-' when the outcome is negative
    most.effective[k]<-equals(order[k],1)

    for(j in 1:nt) {
      effectiveness[k,j]<- equals(order[k],j)
    }
  }
  for(k in 1:nt) {
    for(j in 1:nt) {
      cumeffectiveness[k,j]<- sum(effectiveness[k,1:j])
    }
  }
#SUCRAS#

  for(k in 1:nt) {
    SUCRA[k]<- sum(cumeffectiveness[k,1:(nt-1)])/(nt-1)
  }
# ranking on relative scale
for (k in 1:nt) {
# rk[k] <- nt+1 -rank(d[,k]) # assumes events are "good"
rk[k] <- rank(d[,k]) # assumes events are "bad"
best[k] <- equals(rk[k],1) #calculate probability that treat k is best
}
}
# *** PROGRAM ENDS

#Data
# ns= number of studies; nt=number of treatments
list(ns=36, nt=15)
t[,1] r[,1] n[,1]   t[,2] r[,2] n[,2]   t[,3] r[,3] n[,3]   t[,4] r[,4] n[,4]   na[] time[]
...
...
.
.
.
END
```
