# Supplementary material for: Antiplatelet regimens in the long-term secondary prevention of transient ischaemic attack and ischaemic stroke: an updated network meta-analysis
Source: PubMed Central journal article supplement — BMJ Open. 2016 Mar 17;6(3):e009013. doi: 10.1136/bmjopen-2015-009013 (PMC4800132; doi:10.1136/bmjopen-2015-009013), 2016-03-17
Supplement: bmjopen-2015-009013supp_appendix4.pdf [file bmjopen-2015-009013supp_appendix4.pdf]

## Supplementary appendix 4. Outcome data.

### Outcome data.

| Study                 | Interventions |     |    |    | Total included patients |      |      |      | Serious vascular events |     |     |     | Any bleeding |     |    |    | Stroke |     |     |     |
|-----------------------|---------------|-----|----|----|-------------------------|------|------|------|-------------------------|-----|-----|-----|--------------|-----|----|----|--------|-----|-----|-----|
|                       | t1            | t2  | t3 | t4 | n1                      | n2   | n3   | n4   | v1                      | v2  | v3  | v4  | b1           | b2  | b3 | b4 | s1     | s2  | s3  | s4  |
| 1977 AITIA            | A4            | P   | —  | —  | 162                     | 157  | —    | —    | 26                      | 35  | —   | —   | 7            | 0   | —  | —  | 13     | 22  | —   | —   |
| 1978 Canadian Coop    | A4            | P   | —  | —  | 144                     | 139  | —    | —    | 32                      | 30  | —   | —   | 0            | 2   | —  | —  | 22     | 20  | —   | —   |
| 1982 Guiraud-Chaumeil | A4            | AD2 | P  | —  | 147                     | 137  | 156  | —    | 11                      | 12  | 16  | —   | —            | —   | —  | —  | 7      | —   | 9   | —   |
| 1983 AICLA            | A4            | AD2 | P  | —  | 198                     | 202  | 204  | —    | 31                      | 30  | 46  | —   | 7            | 8   | 2  | —  | 19     | 19  | 33  | —   |
| 1983 Danish coop      | A4            | P   | —  | —  | 101                     | 102  | —    | —    | 23                      | 27  | —   | —   | —            | —   | —  | —  | 17     | 11  | —   | —   |
| 1984 Tohgi            | A4            | TC  | —  | —  | 170                     | 170  | —    | —    | 16                      | 8   | —   | —   | —            | —   | —  | —  | —      | —   | —   | —   |
| 1985 ACCSG            | A4            | AD2 | —  | —  | 442                     | 448  | —    | —    | 85                      | 79  | —   | —   | 36           | 30  | —  | —  | 55     | 45  | —   | —   |
| 1987 Swedish Coop     | A4            | P   | —  | —  | 253                     | 252  | —    | —    | 59                      | 55  | —   | —   | 8            | 5   | —  | —  | 32     | 32  | —   | —   |
| 1989 CATS             | TC            | P   | —  | —  | 531                     | 541  | —    | —    | 112                     | 139 | —   | —   | 36           | 18  | —  | —  | 98     | 80  | —   | —   |
| 1989 TASS             | A4            | TC  | —  | —  | 1540                    | 1529 | —    | —    | 395                     | 370 | —   | —   | 163          | 147 | —  | —  | 212    | 172 | —   | —   |
| 1990 ESPS             | AD2           | P   | —  | —  | 1250                    | 1250 | —    | —    | 183                     | 263 | —   | —   | -            | -   | —  | —  | 114    | 184 | —   | —   |
| 1991 Dutch TIA        | A1            | A3  | —  | —  | 1555                    | 1576 | —    | —    | 228                     | 240 | —   | —   | 89           | 138 | —  | —  | —      | —   | —   | —   |
| 1991 SALT             | A2            | P   | —  | —  | 676                     | 684  | —    | —    | 163                     | 193 | —   | —   | 49           | 22  | —  | —  | 93     | 112 | —   | —   |
| 1991 UK-TIA           | A3            | A4  | P  | —  | 805                     | 815  | 814  | —    | 178                     | 176 | 204 | —   | 55           | 71  | 27 | —  | 100    | 101 | 119 | —   |
| 1996 CAPRIE stroke    | A3            | C   | —  | —  | 3195                    | 3233 | —    | —    | 488                     | 453 | —   | —   | —            | —   | —  | —  | —      | —   | —   | —   |
| 1996 ESPS2            | A1            | AD1 | D  | P  | 1649                    | 1650 | 1654 | 1649 | 293                     | 235 | 297 | 332 | 135          | 144 | 77 | 74 | 206    | 157 | 211 | 250 |
| 1998 Alvarez Sabín    | A3            | TF  | —  | —  | 111                     | 106  | —    | —    | 34                      | 22  | —   | —   | 12           | 3   | —  | —  | 26     | 14  | —   | —   |
| 2000 CSPS             | CL            | P   | —  | —  | 533                     | 534  | —    | —    | 37                      | 67  | —   | —   | 19           | 18  | —  | —  | 34     | 64  | —   | —   |
| 2003 AAASPS           | A4            | TC  | —  | —  | 907                     | 902  | —    | —    | 112                     | 133 | —   | —   | 19           | 10  | —  | —  | 86     | 107 | —   | —   |
| 2003 TOPALS           | A+TC          | TC  | —  | —  | 132                     | 138  | —    | —    | 10                      | 10  | —   | —   | 6            | 6   | —  | —  | 7      | 9   | —   | —   |
| 2003 TACIP            | A3            | TF  | —  | —  | 1052                    | 1055 | —    | —    | 136                     | 140 | —   | —   | 229          | 145 | —  | —  | 112    | 109 | —   | —   |
| 2004 TAPIRSS          | A3            | TF  | —  | —  | 216                     | 213  | —    | —    | 25                      | 27  | —   | —   | 18           | 6   | —  | —  | 17     | 19  | —   | —   |

### Supplementary appendix 4. Outcome data.

|                                    |     |      |   |   |       |       |   |   |      |      |   |   |     |     |   |   |     |     |   |   |
|------------------------------------|-----|------|---|---|-------|-------|---|---|------|------|---|---|-----|-----|---|---|-----|-----|---|---|
| 2004 MATCH                         | A+C | C    | — | — | 3797  | 3802  | — | — | 445  | 473  | — | — | 193 | 61  | — | — | 339 | 347 | — | — |
| 2006 ESPRIT                        | A2  | AD1  | — | — | 1376  | 1363  | — | — | 192  | 149  | — | — | 53  | 35  | — | — | 137 | 108 | — | — |
| 2007 FASTER                        | A2  | A+C  | — | — | 194   | 198   | — | — | 23   | 17   | — | — | 27  | 67  | — | — | 21  | 14  | — | — |
| 2008 Fukuuchi                      | C   | TC   | — | — | 573   | 578   | — | — | 20   | 16   | — | — | 8   | 5   | — | — | 20  | 16  | — | — |
| 2008 CASISP                        | A2  | CL   | — | — | 359   | 360   | — | — | 24   | 13   | — | — | 32  | 16  | — | — | 20  | 12  | — | — |
| 2008 PRoFESS                       | AD1 | C    | — | — | 10181 | 10151 | — | — | 1333 | 1333 | — | — | 535 | 494 | — | — | 916 | 898 | — | — |
| 2009 Uchiyama Phase IIIa           | C   | TC   | — | — | 366   | 345   | — | — | 9    | 10   | — | — | -   | -   | — | — | 8   | 10  | — | — |
| 2010 CSPS2                         | A2  | CL   | — | — | 1335  | 1337  | — | — | 135  | 102  | — | — | 57  | 23  | — | — | 119 | 82  | — | — |
| 2011 CHARISMA stroke and TIA group | A2  | A+C  | — | — | 2163  | 2157  | — | — | 207  | 174  | — | — | 444 | 807 | — | — | 131 | 105 | — | — |
| 2011 TOSS2                         | A+C | A+CL | — | — | 225   | 232   | — | — | 10   | 15   | — | — | 6   | 2   | — | — | 7   | 11  | — | — |
| 2011 CAIST                         | A3  | CL   | — | — | 227   | 231   | — | — | 9    | 6    | — | — | 30  | 25  | — | — | 9   | 5   | — | — |
| 2011 JASAP                         | A2  | AD1  | — | — | 639   | 652   | — | — | 55   | 66   | — | — | 187 | 192 | — | — | 39  | 57  | — | — |
| 2012 SPS3                          | A3  | A+C  | — | — | 1503  | 1517  | — | — | 174  | 153  | — | — | 56  | 105 | — | — | 138 | 125 | — | — |
| 2013 ECLIPse                       | A2  | A+CL | — | — | 103   | 100   | — | — | 1    | 1    | — | — | 0   | 1   | — | — | 1   | 1   | — | — |

A, aspirin; D, dipyridamole; P, placebo; TF, triflusal; TC, ticlopidine; CL, cilostazol; C, clopidogrel; A1, aspirin 30-50 mg daily; A2, aspirin 75-162 mg daily; A3, aspirin 283-330 mg daily; A4, aspirin 500-1500 mg daily; AD1, aspirin 50 mg plus dipyridamole 400 mg daily; AD2, aspirin 990-1300 mg plus dipyridamole 150-300 mg daily; t1, t2, t3, and t4, comparison arms of each study; n1, n2, n3, and n4, total included patients of each comparison arm; v1, v2, v3, and v4, the number of serious vascular events of each comparison arm; b1, b2, b3, and b4, the number of bleeding events of each comparison arm; s1, s2, s3, and s4, the number of recurrent stroke of each comparison arm.
