# Supplementary material for: Antiplatelet regimens in the long-term secondary prevention of transient ischaemic attack and ischaemic stroke: an updated network meta-analysis
Source: PubMed Central journal article supplement — BMJ Open. 2016 Mar 17;6(3):e009013. doi: 10.1136/bmjopen-2015-009013 (PMC4800132; doi:10.1136/bmjopen-2015-009013), 2016-03-17
Supplement: bmjopen-2015-009013supp_appendix6.pdf [file bmjopen-2015-009013supp_appendix6.pdf]

**Supplementary appendix 6. Main analysis, sensitivity analysis, and direct comparison for serious vascular events.**

**Main analysis, sensitivity analysis, and direct comparison for serious vascular events**

| Comparisons | Network meta-analysis |                         |                             |                             |                  |                  |                                            |                                    |                                   |  | Direct comparisons |
|-------------|-----------------------|-------------------------|-----------------------------|-----------------------------|------------------|------------------|--------------------------------------------|------------------------------------|-----------------------------------|--|--------------------|
|             | All trials (n=36)     | Low risk of bias (n=29) | Allocation concealed (n=33) | Adjudication blinded (n=31) | Attrition (n=31) | bias             | Trials with ≥24 months of follow-up (n=19) | Trials initiated after 1980 (n=28) | A2=Aspirin 75-330 mg daily (n=36) |  |                    |
| P vs D      | 0.88 (0.75-1.06)      | 0.89 (0.75-1.09)        | 0.75 (0.75-1.06)            | 0.89 (0.75-1.08)            | 0.88 (0.75-1.06) | 0.86 (0.71-1.05) | 0.88 (0.74-1.08)                           | 0.88 (0.75-1.05)                   | 0.87 (0.73-1.03)                  |  |                    |
| P vs A1     | 0.86 (0.74-1.00)      | 0.87 (0.74-1.02)        | 0.86 (0.74-1.00)            | 0.87 (0.74-1.01)            | 0.86 (0.74-1.00) | 0.85 (0.72-1.01) | 0.86 (0.73-1.01)                           | 0.86 (0.74-0.99)                   | 0.86 (0.72-1.02)                  |  |                    |
| P vs A2     | 0.83 (0.71-0.96)      | 0.80 (0.68-0.95)        | 0.83 (0.71-0.96)            | 0.80 (0.68-0.94)            | 0.83 (0.71-0.97) | 0.84 (0.71-1.00) | 0.83 (0.70-0.97)                           | 0.83 (0.75-0.93)                   | 0.81 (0.63-1.03)                  |  |                    |
| P vs A3     | 0.84 (0.73-0.97)      | 0.85 (0.74-0.98)        | 0.84 (0.73-0.97)            | 0.85 (0.74-0.98)            | 0.85 (0.73-0.97) | 0.87 (0.74-1.02) | 0.84 (0.72-0.97)                           | —                                  | 0.85 (0.67-1.07)                  |  |                    |
| P vs A4     | 0.82 (0.72-0.93)      | 0.84 (0.73-0.96)        | 0.82 (0.72-0.93)            | 0.82 (0.72-0.93)            | 0.83 (0.73-0.95) | 0.86 (0.75-0.99) | 0.81 (0.67-0.97)                           | 0.82 (0.73-0.92)                   | 0.83 (0.71-0.98)                  |  |                    |
| P vs AD1    | 0.72 (0.63-0.83)      | 0.74 (0.64-0.87)        | 0.72 (0.63-0.83)            | 0.74 (0.64-0.86)            | 0.72 (0.63-0.83) | 0.67 (0.56-0.79) | 0.72 (0.62-0.84)                           | 0.72 (0.63-0.83)                   | 0.66 (0.55-0.79)                  |  |                    |
| P vs AD2    | 0.70 (0.59-0.83)      | 0.74 (0.56-0.97)        | 0.69 (0.58-0.82)            | 0.70 (0.59-0.82)            | 0.70 (0.58-0.82) | 0.76 (0.59-1.02) | 0.68 (0.53-0.85)                           | 0.70 (0.60-0.83)                   | 0.65 (0.54-0.78)                  |  |                    |
| P vs TC     | 0.80 (0.68-0.93)      | 0.83 (0.70-0.98)        | 0.81 (0.69-0.95)            | 0.81 (0.69-0.95)            | 0.82 (0.70-0.96) | 0.81 (0.67-0.97) | 0.80 (0.66-0.97)                           | 0.80 (0.68-0.93)                   | 0.77 (0.58-1.03)                  |  |                    |
| P vs A+TC   | 0.94 (0.32-2.17)      | —                       | 0.99 (0.34-2.69)            | —                           | —                | —                | 0.92 (0.33-1.97)                           | 0.91 (0.30-2.06)                   | —                                 |  |                    |
| P vs C      | 0.74 (0.65-0.86)      | 0.75 (0.65-0.88)        | 0.74 (0.65-0.86)            | 0.75 (0.65-0.88)            | 0.74 (0.65-0.87) | 0.67 (0.53-0.84) | 0.74 (0.64-0.88)                           | 0.74 (0.65-0.86)                   | —                                 |  |                    |
| P vs A+C    | 0.70 (0.59-0.83)      | 0.69 (0.59-0.83)        | 0.70 (0.59-0.83)            | 0.69 (0.59-0.83)            | 0.70 (0.59-0.83) | 0.72 (0.58-0.91) | 0.69 (0.58-0.83)                           | 0.70 (0.60-0.83)                   | —                                 |  |                    |
| P vs TF     | 0.82 (0.63-1.04)      | 0.89 (0.67-1.17)        | 0.89 (0.67-1.16)            | 0.89 (0.67-1.15)            | 0.89 (0.67-1.16) | 0.83 (0.60-1.09) | 0.81 (0.62-1.05)                           | 0.81 (0.64-1.02)                   | —                                 |  |                    |
| P vs CL     | 0.57 (0.45-0.72)      | 0.55 (0.43-0.71)        | 0.57 (0.45-0.72)            | 0.56 (0.44-0.71)            | 0.56 (0.45-0.72) | 0.59 (0.46-0.78) | 0.56 (0.44-0.72)                           | 0.57 (0.46-0.72)                   | 0.52 (0.34-0.79)                  |  |                    |
| P vs A+CL   | 0.94 (0.47-2.22)      | 0.96 (0.51-2.38)        | 0.96 (0.47-2.33)            | 1.00 (0.50-2.56)            | 0.95 (0.46-2.50) | —                | 0.92 (0.46-2.27)                           | 0.94 (0.47-2.22)                   | —                                 |  |                    |
| D vs A1     | 0.97 (0.80-1.16)      | 0.97 (0.80-1.16)        | 0.97 (0.80-1.16)            | 0.97 (0.80-1.17)            | 0.97 (0.80-1.17) | 0.99 (0.81-1.20) | 0.97 (0.79-1.17)                           | 0.97 (0.81-1.15)                   | 0.99 (0.83-1.18)                  |  |                    |
| D vs A2     | 0.93 (0.76-1.15)      | 0.88 (0.70-1.12)        | 0.93 (0.76-1.15)            | 0.88 (0.71-1.11)            | 0.93 (0.76-1.15) | 0.97 (0.78-1.23) | 0.93 (0.74-1.16)                           | 0.93 (0.79-1.12)                   | —                                 |  |                    |
| D vs A3     | 0.95 (0.78-1.15)      | 0.95 (0.77-1.16)        | 0.95 (0.78-1.15)            | 0.95 (0.78-1.15)            | 0.95 (0.78-1.16) | 1.01 (0.80-1.26) | 0.95 (0.76-1.17)                           | —                                  | —                                 |  |                    |
| D vs A4     | 0.93 (0.75-1.15)      | 0.94 (0.74-1.16)        | 0.93 (0.75-1.13)            | 0.92 (0.74-1.13)            | 0.94 (0.75-1.16) | 1.00 (0.79-1.26) | 0.91 (0.70-1.17)                           | 0.92 (0.75-1.12)                   | —                                 |  |                    |
| D vs AD1    | 0.81 (0.68-0.97)      | 0.82 (0.68-1.00)        | 0.81 (0.68-0.97)            | 0.82 (0.68-0.99)            | 0.81 (0.68-0.98) | 0.76 (0.63-0.94) | 0.81 (0.67-0.98)                           | 0.81 (0.68-0.97)                   | 0.76 (0.63-0.91)                  |  |                    |
| D vs AD2    | 0.80 (0.62-1.01)      | 0.83 (0.58-1.13)        | 0.78 (0.61-0.99)            | 0.78 (0.60-0.98)            | 0.79 (0.61-1.00) | 0.90 (0.64-1.24) | 0.76 (0.56-1.02)                           | 0.79 (0.62-1.00)                   | —                                 |  |                    |

**Supplementary appendix 6. Main analysis, sensitivity analysis, and direct comparison for serious vascular events.**

|            |                  |                  |                  |                  |                  |                  |                  |                  |                   |
|------------|------------------|------------------|------------------|------------------|------------------|------------------|------------------|------------------|-------------------|
| D vs TC    | 0.90 (0.71-1.13) | 0.92 (0.72-1.17) | 0.92 (0.72-1.15) | 0.91 (0.72-1.14) | 0.93 (0.73-1.16) | 0.94 (0.71-1.21) | 0.91 (0.70-1.17) | 0.90 (0.71-1.11) | —                 |
| D vs A+TC  | 1.06 (0.35-2.44) | —                | 1.11 (0.38-3.03) | —                | —                | —                | 1.04 (0.37-2.24) | 1.03 (0.34-2.34) | —                 |
| D vs C     | 0.84 (0.69-1.02) | 0.85 (0.69-1.04) | 0.84 (0.69-1.02) | 0.84 (0.69-1.02) | 0.84 (0.69-1.03) | 0.78 (0.60-1.00) | 0.84 (0.67-1.04) | 0.84 (0.69-1.01) | —                 |
| D vs A+C   | 0.79 (0.63-0.98) | 0.78 (0.62-0.97) | 0.79 (0.63-0.97) | 0.78 (0.62-0.96) | 0.79 (0.63-0.98) | 0.85 (0.64-1.10) | 0.79 (0.62-0.99) | 0.79 (0.64-0.97) | —                 |
| D vs TF    | 0.93 (0.69-1.22) | 1.00 (0.72-1.34) | 1.00 (0.73-1.35) | 0.99 (0.72-1.35) | 1.00 (0.73-1.34) | 0.95 (0.67-1.30) | 0.92 (0.66-1.23) | 0.92 (0.69-1.19) | —                 |
| D vs CL    | 0.65 (0.48-0.86) | 0.63 (0.46-0.84) | 0.65 (0.49-0.85) | 0.63 (0.46-0.82) | 0.65 (0.48-0.85) | 0.70 (0.50-0.94) | 0.65 (0.48-0.85) | 0.65 (0.50-0.85) | —                 |
| D vs A+CL  | 1.26 (0.52-2.50) | 1.25 (0.54-2.66) | 1.29 (0.53-2.61) | 1.32 (0.55-2.84) | 1.29 (0.52-2.80) | —                | 1.23 (0.51-2.61) | 1.25 (0.52-2.57) | —                 |
| A1 vs A2   | 0.96 (0.81-1.16) | 0.92 (0.75-1.14) | 0.96 (0.81-1.16) | 0.92 (0.76-1.12) | 0.96 (0.81-1.16) | 0.99 (0.81-1.23) | 0.96 (0.79-1.18) | 0.97 (0.85-1.12) | —                 |
| A1 vs A3   | 0.98 (0.85-1.14) | 0.98 (0.84-1.15) | 0.98 (0.85-1.14) | 0.98 (0.84-1.14) | 0.99 (0.84-1.15) | 1.03 (0.86-1.22) | 0.98 (0.83-1.15) | —                | 1.05 (0.86-1.27)  |
| A1 vs A4   | 0.96 (0.79-1.16) | 0.97 (0.79-1.17) | 0.96 (0.79-1.15) | 0.95 (0.79-1.15) | 0.97 (0.80-1.17) | 1.02 (0.82-1.25) | 0.95 (0.75-1.18) | 0.96 (0.80-1.14) | —                 |
| A1 vs AD1  | 0.84 (0.72-0.98) | 0.85 (0.72-1.01) | 0.84 (0.72-0.99) | 0.85 (0.73-1.00) | 0.84 (0.72-0.99) | 0.78 (0.65-0.95) | 0.84 (0.71-1.00) | 0.84 (0.72-0.98) | 0.77 (0.64-0.93)  |
| A1 vs AD2  | 0.82 (0.66-1.02) | 0.86 (0.62-1.16) | 0.81 (0.64-1.01) | 0.80 (0.64-1.00) | 0.81 (0.64-1.02) | 0.89 (0.66-1.25) | 0.79 (0.59-1.04) | 0.82 (0.66-1.02) | —                 |
| A1 vs TC   | 0.93 (0.76-1.15) | 0.94 (0.76-1.18) | 0.93 (0.76-1.16) | 0.93 (0.75-1.16) | 0.95 (0.78-1.18) | 0.93 (0.74-1.20) | 0.93 (0.75-1.19) | 0.92 (0.76-1.14) | —                 |
| A1 vs A+TC | 0.86 (0.37-2.56) | —                | 0.90 (0.40-3.03) | —                | —                | —                | 0.87 (0.38-2.33) | 0.83 (0.35-2.44) | —                 |
| A1 vs C    | 0.86 (0.74-1.03) | 0.87 (0.74-1.04) | 0.86 (0.74-1.03) | 0.86 (0.74-1.03) | 0.86 (0.74-1.03) | 0.78 (0.61-1.01) | 0.86 (0.72-1.04) | 0.86 (0.74-1.02) | —                 |
| A1 vs A+C  | 0.81 (0.68-0.98) | 0.80 (0.66-0.98) | 0.81 (0.68-0.98) | 0.80 (0.67-0.97) | 0.81 (0.68-0.99) | 0.85 (0.67-1.09) | 0.81 (0.67-1.00) | 0.81 (0.68-0.98) | —                 |
| A1 vs TF   | 0.94 (0.73-1.23) | 1.01 (0.77-1.35) | 1.01 (0.78-1.37) | 1.00 (0.77-1.33) | 1.01 (0.78-1.35) | 0.94 (0.70-1.28) | 0.93 (0.71-1.23) | 0.93 (0.73-1.20) | —                 |
| A1 vs CL   | 0.66 (0.51-0.87) | 0.64 (0.48-0.85) | 0.66 (0.51-0.87) | 0.64 (0.49-0.84) | 0.66 (0.50-0.87) | 0.69 (0.52-0.95) | 0.66 (0.51-0.87) | 0.67 (0.52-0.86) | —                 |
| A1 vs A+CL | 1.10 (0.54-2.56) | 1.11 (0.57-2.70) | 1.12 (0.54-2.70) | 1.15 (0.57-2.94) | 1.11 (0.54-2.94) | —                | 1.08 (0.54-2.70) | 1.10 (0.55-2.63) | —                 |
| A2 vs A3   | 1.02 (0.87-1.19) | 1.06 (0.88-1.28) | 1.01 (0.86-1.19) | 1.06 (0.89-1.27) | 1.02 (0.86-1.20) | 1.03 (0.84-1.26) | 1.01 (0.85-1.20) | —                | —                 |
| A2 vs A4   | 0.99 (0.82-1.18) | 1.05 (0.85-1.28) | 0.99 (0.82-1.19) | 1.03 (0.84-1.26) | 1.01 (0.82-1.22) | 1.02 (0.82-1.27) | 0.98 (0.78-1.21) | 0.98 (0.84-1.14) | —                 |
| A2 vs AD1  | 0.87 (0.76-1.00) | 0.93 (0.78-1.12) | 0.87 (0.75-1.00) | 0.93 (0.78-1.11) | 0.87 (0.75-1.01) | 0.79 (0.65-0.95) | 0.87 (0.75-1.01) | 0.87 (0.77-0.96) | 0.93 (0.59-1.45)* |
| A2 vs AD2  | 0.85 (0.67-1.05) | 0.93 (0.66-1.27) | 0.83 (0.66-1.04) | 0.87 (0.69-1.09) | 0.84 (0.66-1.06) | 0.92 (0.66-1.26) | 0.82 (0.61-1.07) | 0.84 (0.69-1.02) | —                 |
| A2 vs TC   | 0.97 (0.78-1.18) | 1.04 (0.82-1.30) | 0.98 (0.79-1.20) | 1.02 (0.81-1.27) | 0.99 (0.80-1.22) | 0.96 (0.74-1.22) | 0.97 (0.77-1.22) | 0.95 (0.79-1.13) | —                 |
| A2 vs A+TC | 1.13 (0.38-2.62) | —                | 1.19 (0.41-3.23) | —                | —                | —                | 1.11 (0.40-2.42) | 1.09 (0.36-2.45) | —                 |

**Supplementary appendix 6. Main analysis, sensitivity analysis, and direct comparison for serious vascular events.**

|            |                  |                  |                  |                  |                  |                  |                  |                  |                   |
|------------|------------------|------------------|------------------|------------------|------------------|------------------|------------------|------------------|-------------------|
| A2 vs C    | 0.90 (0.77-1.05) | 0.95 (0.79-1.13) | 0.90 (0.77-1.05) | 0.94 (0.79-1.12) | 0.90 (0.77-1.05) | 0.80 (0.62-1.01) | 0.90 (0.76-1.06) | 0.89 (0.80-0.99) | —                 |
| A2 vs A+C  | 0.84 (0.72-0.98) | 0.88 (0.74-1.03) | 0.84 (0.72-0.98) | 0.87 (0.74-1.03) | 0.85 (0.72-0.98) | 0.87 (0.71-1.05) | 0.84 (0.72-0.99) | 0.84 (0.74-0.95) | 0.82 (0.67-1.00)  |
| A2 vs TF   | 0.99 (0.74-1.28) | 1.12 (0.82-1.50) | 1.07 (0.80-1.41) | 1.11 (0.82-1.47) | 1.07 (0.80-1.42) | 0.98 (0.70-1.32) | 0.98 (0.73-1.27) | 0.97 (0.78-1.18) | —                 |
| A2 vs CL   | 0.69 (0.55-0.86) | 0.70 (0.55-0.87) | 0.69 (0.55-0.85) | 0.70 (0.56-0.86) | 0.69 (0.55-0.85) | 0.71 (0.55-0.90) | 0.69 (0.55-0.86) | 0.69 (0.56-0.85) | 0.70 (0.55-0.90)  |
| A2 vs A+CL | 1.34 (0.55-2.65) | 1.40 (0.63-2.96) | 1.37 (0.57-2.76) | 1.47 (0.64-3.09) | 1.38 (0.56-2.95) | —                | 1.31 (0.56-2.77) | 1.32 (0.57-2.70) | 1.03 (0.06-16.7)  |
| A3 vs A4   | 0.98 (0.83-1.15) | 0.99 (0.83-1.17) | 0.98 (0.82-1.15) | 0.97 (0.82-1.15) | 0.99 (0.82-1.17) | 0.99 (0.82-1.20) | 0.97 (0.79-1.17) | —                | 0.97 (0.77-1.23)  |
| A3 vs AD1  | 0.85 (0.75-0.98) | 0.87 (0.75-1.02) | 0.85 (0.75-0.98) | 0.87 (0.76-1.01) | 0.85 (0.74-0.99) | 0.76 (0.62-0.94) | 0.85 (0.74-1.00) | —                | —                 |
| A3 vs AD2  | 0.84 (0.68-1.03) | 0.87 (0.63-1.17) | 0.83 (0.66-1.01) | 0.82 (0.66-1.01) | 0.83 (0.66-1.02) | 0.88 (0.65-1.20) | 0.81 (0.61-1.05) | —                | —                 |
| A3 vs TC   | 0.94 (0.78-1.15) | 0.96 (0.80-1.18) | 0.96 (0.79-1.16) | 0.95 (0.79-1.16) | 0.96 (0.80-1.18) | 0.92 (0.74-1.16) | 0.95 (0.78-1.18) | —                | —                 |
| A3 vs A+TC | 0.88 (0.37-2.56) | —                | 0.92 (0.41-3.13) | —                | —                | —                | 0.89 (0.40-2.38) | —                | —                 |
| A3 vs C    | 0.88 (0.78-1.01) | 0.89 (0.79-1.01) | 0.88 (0.78-1.00) | 0.88 (0.79-1.01) | 0.88 (0.78-1.01) | 0.76 (0.59-0.99) | 0.88 (0.78-1.02) | —                | 0.90 (0.79-1.04)  |
| A3 vs A+C  | 0.83 (0.71-0.96) | 0.82 (0.70-0.95) | 0.83 (0.71-0.96) | 0.82 (0.71-0.96) | 0.83 (0.71-0.96) | 0.83 (0.68-1.03) | 0.83 (0.71-0.97) | —                | 0.86 (0.68-1.08)  |
| A3 vs TF   | 0.96 (0.78-1.20) | 1.03 (0.82-1.32) | 1.04 (0.83-1.32) | 1.03 (0.82-1.32) | 1.03 (0.83-1.32) | 0.93 (0.73-1.19) | 0.95 (0.77-1.19) | —                | 0.94 (0.69-1.28)  |
| A3 vs CL   | 0.67 (0.53-0.87) | 0.65 (0.50-0.86) | 0.68 (0.53-0.87) | 0.65 (0.51-0.85) | 0.67 (0.52-0.87) | 0.68 (0.51-0.92) | 0.68 (0.52-0.88) | —                | 0.65 (0.23-1.85)  |
| A3 vs A+CL | 1.12 (0.56-2.56) | 1.14 (0.59-2.78) | 1.15 (0.56-2.70) | 1.18 (0.60-3.03) | 1.14 (0.55-2.94) | —                | 1.10 (0.56-2.70) | —                | —                 |
| A4 vs AD1  | 0.88 (0.74-1.05) | 0.88 (0.74-1.08) | 0.88 (0.74-1.05) | 0.89 (0.75-1.09) | 0.87 (0.72-1.04) | 0.77 (0.62-0.96) | 0.88 (0.72-1.11) | 0.88 (0.74-1.05) | —                 |
| A4 vs AD2  | 0.86 (0.72-1.03) | 0.88 (0.67-1.13) | 0.84 (0.70-1.01) | 0.85 (0.70-1.02) | 0.84 (0.69-1.01) | 0.88 (0.70-1.15) | 0.84 (0.62-1.12) | 0.86 (0.71-1.02) | 0.94 (0.71-1.23)  |
| A4 vs TC   | 0.97 (0.85-1.11) | 0.98 (0.85-1.12) | 0.99 (0.87-1.12) | 0.99 (0.87-1.12) | 0.98 (0.86-1.12) | 0.93 (0.79-1.10) | 0.99 (0.86-1.15) | 0.97 (0.85-1.10) | 0.97 (0.71-1.32)* |
| A4 vs A+TC | 0.90 (0.38-2.63) | —                | 0.94 (0.42-3.23) | —                | —                | —                | 0.93 (0.41-2.44) | 0.88 (0.37-2.50) | —                 |
| A4 vs C    | 0.90 (0.76-1.09) | 0.90 (0.75-1.09) | 0.90 (0.76-1.09) | 0.91 (0.77-1.1)  | 0.89 (0.75-1.09) | 0.77 (0.59-1.01) | 0.92 (0.75-1.15) | 0.90 (0.76-1.09) | —                 |
| A4 vs A+C  | 0.85 (0.70-1.04) | 0.83 (0.68-1.02) | 0.85 (0.70-1.04) | 0.85 (0.7-1.04)  | 0.84 (0.69-1.04) | 0.84 (0.66-1.09) | 0.86 (0.69-1.09) | 0.85 (0.71-1.04) | —                 |
| A4 vs TF   | 0.98 (0.76-1.28) | 1.04 (0.79-1.41) | 1.06 (0.81-1.43) | 1.05 (0.79-1.43) | 1.04 (0.79-1.43) | 0.93 (0.69-1.30) | 0.99 (0.75-1.33) | 0.98 (0.76-1.28) | —                 |
| A4 vs CL   | 0.69 (0.53-0.91) | 0.66 (0.51-0.88) | 0.69 (0.53-0.91) | 0.68 (0.52-0.88) | 0.68 (0.52-0.90) | 0.68 (0.51-0.93) | 0.70 (0.53-0.94) | 0.70 (0.55-0.91) | —                 |
| A4 vs A+CL | 1.15 (0.56-2.70) | 1.15 (0.59-2.86) | 1.18 (0.57-2.86) | 1.20 (0.61-3.13) | 1.15 (0.55-3.03) | —                | 1.14 (0.57-2.86) | 1.15 (0.57-2.78) | —                 |
| AD1 vs AD2 | 0.98 (0.79-1.20) | 1.00 (0.72-1.34) | 0.96 (0.77-1.18) | 0.94 (0.75-1.16) | 0.97 (0.77-1.20) | 1.17 (0.84-1.60) | 0.94 (0.71-1.22) | 0.97 (0.79-1.19) | —                 |

**Supplementary appendix 6. Main analysis, sensitivity analysis, and direct comparison for serious vascular events.**

|              |                  |                  |                  |                  |                  |                  |                  |                  |                  |
|--------------|------------------|------------------|------------------|------------------|------------------|------------------|------------------|------------------|------------------|
| AD1 vs TC    | 1.11 (0.91-1.34) | 1.12 (0.90-1.36) | 1.13 (0.92-1.37) | 1.10 (0.89-1.34) | 1.14 (0.93-1.39) | 1.21 (0.94-1.55) | 1.12 (0.89-1.39) | 1.10 (0.90-1.33) | —                |
| AD1 vs A+TC  | 1.30 (0.43-2.98) | —                | 1.37 (0.47-3.70) | —                | —                | —                | 1.28 (0.46-2.75) | 1.26 (0.42-2.84) | —                |
| AD1 vs C     | 1.03 (0.93-1.16) | 1.02 (0.90-1.15) | 1.03 (0.93-1.16) | 1.02 (0.91-1.14) | 1.03 (0.92-1.16) | 1.01 (0.86-1.17) | 1.03 (0.91-1.18) | 1.03 (0.93-1.15) | 1.00 (0.93-1.09) |
| AD1 vs A+C   | 0.97 (0.83-1.13) | 0.94 (0.79-1.10) | 0.97 (0.83-1.13) | 0.95 (0.80-1.11) | 0.97 (0.83-1.13) | 1.10 (0.85-1.39) | 0.97 (0.82-1.14) | 0.97 (0.84-1.12) | —                |
| AD1 vs TF    | 1.14 (0.87-1.45) | 1.20 (0.90-1.57) | 1.23 (0.93-1.61) | 1.20 (0.90-1.56) | 1.23 (0.92-1.60) | 1.24 (0.88-1.68) | 1.13 (0.85-1.46) | 1.13 (0.89-1.41) | —                |
| AD1 vs CL    | 0.80 (0.62-1.01) | 0.76 (0.57-0.97) | 0.80 (0.62-1.00) | 0.76 (0.58-0.97) | 0.80 (0.61-1.01) | 0.90 (0.67-1.20) | 0.80 (0.61-1.01) | 0.80 (0.63-1.00) | —                |
| AD1 vs A+CL  | 1.54 (0.65-3.04) | 1.50 (0.67-3.19) | 1.58 (0.66-3.18) | 1.60 (0.68-3.48) | 1.58 (0.64-3.41) | —                | 1.51 (0.64-3.16) | 1.53 (0.66-3.11) | —                |
| AD2 vs TC    | 1.14 (0.92-1.41) | 1.11 (0.84-1.52) | 1.16 (0.94-1.47) | 1.16 (0.94-1.45) | 1.18 (0.95-1.47) | 1.06 (0.78-1.41) | 1.18 (0.89-1.61) | 1.12 (0.93-1.39) | —                |
| AD2 vs A+TC  | 1.05 (0.45-3.13) | —                | 1.12 (0.49-3.85) | —                | —                | —                | 1.10 (0.47-3.13) | 1.02 (0.43-2.94) | —                |
| AD2 vs C     | 1.05 (0.85-1.32) | 1.02 (0.76-1.41) | 1.08 (0.87-1.35) | 1.08 (0.88-1.35) | 1.06 (0.86-1.35) | 0.85 (0.61-1.23) | 1.10 (0.84-1.47) | 1.05 (0.86-1.32) | —                |
| AD2 vs A+C   | 0.99 (0.79-1.27) | 0.94 (0.69-1.32) | 1.01 (0.80-1.28) | 1.00 (0.80-1.27) | 1.00 (0.79-1.28) | 0.93 (0.67-1.33) | 1.03 (0.78-1.39) | 0.99 (0.80-1.27) | —                |
| AD2 vs TF    | 1.15 (0.85-1.56) | 1.19 (0.82-1.75) | 1.25 (0.93-1.75) | 1.25 (0.93-1.72) | 1.25 (0.92-1.75) | 1.08 (0.71-1.56) | 1.18 (0.85-1.69) | 1.14 (0.86-1.54) | —                |
| AD2 vs CL    | 0.81 (0.61-1.09) | 0.75 (0.52-1.11) | 0.82 (0.62-1.10) | 0.80 (0.60-1.08) | 0.81 (0.61-1.10) | 0.76 (0.53-1.12) | 0.84 (0.61-1.19) | 0.81 (0.63-1.1)  | —                |
| AD2 vs A+CL  | 1.35 (0.66-3.23) | 1.30 (0.64-3.33) | 1.39 (0.68-3.33) | 1.43 (0.71-3.7)  | 1.37 (0.65-3.57) | —                | 1.35 (0.66-3.57) | 1.35 (0.65-3.23) | —                |
| TC vs A+TC   | 1.17 (0.40-2.66) | —                | 1.22 (0.43-3.18) | —                | —                | —                | 1.15 (0.42-2.43) | 1.14 (0.39-2.54) | 1.05 (0.42-2.61) |
| TC vs C      | 0.93 (0.77-1.14) | 0.91 (0.75-1.12) | 0.91 (0.75-1.12) | 0.93 (0.76-1.14) | 0.91 (0.74-1.11) | 0.83 (0.62-1.11) | 0.92 (0.75-1.16) | 0.93 (0.78-1.14) | 1.10 (0.64-1.89) |
| TC vs A+C    | 0.87 (0.70-1.09) | 0.84 (0.68-1.05) | 0.85 (0.69-1.08) | 0.85 (0.69-1.06) | 0.85 (0.68-1.06) | 0.90 (0.69-1.19) | 0.86 (0.69-1.10) | 0.88 (0.71-1.09) | —                |
| TC vs TF     | 1.03 (0.76-1.34) | 1.09 (0.79-1.46) | 1.10 (0.80-1.47) | 1.10 (0.79-1.47) | 1.09 (0.79-1.46) | 1.03 (0.72-1.41) | 1.02 (0.74-1.36) | 1.03 (0.77-1.35) | —                |
| TC vs CL     | 0.71 (0.54-0.94) | 0.67 (0.51-0.91) | 0.70 (0.53-0.94) | 0.68 (0.52-0.91) | 0.69 (0.52-0.92) | 0.74 (0.54-1.02) | 0.70 (0.52-0.95) | 0.72 (0.56-0.95) | —                |
| TC vs A+CL   | 1.18 (0.58-2.78) | 1.16 (0.59-2.94) | 1.19 (0.56-2.86) | 1.22 (0.60-3.23) | 1.16 (0.56-3.03) | —                | 1.15 (0.57-2.86) | 1.19 (0.58-2.86) | —                |
| A+TC vs C    | 0.79 (0.35-2.38) | —                | 0.75 (0.28-2.22) | —                | —                | —                | 0.81 (0.37-2.27) | 0.81 (0.36-2.50) | —                |
| A+TC vs A+C  | 0.75 (0.32-2.22) | —                | 0.70 (0.26-2.08) | —                | —                | —                | 0.76 (0.34-2.13) | 0.77 (0.34-2.33) | —                |
| A+TC vs TF   | 1.11 (0.38-2.68) | —                | 1.14 (0.33-2.68) | —                | —                | —                | 1.09 (0.39-2.55) | 1.13 (0.39-2.73) | —                |
| A+TC vs CL   | 0.61 (0.27-1.85) | —                | 0.58 (0.23-1.72) | —                | —                | —                | 0.61 (0.27-1.75) | 0.63 (0.27-1.89) | —                |
| A+TC vs A+CL | 1.01 (0.58-4.17) | —                | 0.99 (0.36-4.17) | —                | —                | —                | 1.01 (0.38-3.85) | 1.04 (0.38-4.55) | —                |

**Supplementary appendix 6. Main analysis, sensitivity analysis, and direct comparison for serious vascular events.**

|             |                  |                  |                  |                  |                  |                  |                  |                  |                  |
|-------------|------------------|------------------|------------------|------------------|------------------|------------------|------------------|------------------|------------------|
| C vs A+C    | 0.94 (0.82-1.07) | 0.93 (0.80-1.06) | 0.94 (0.82-1.07) | 0.93 (0.81-1.06) | 0.94 (0.82-1.07) | 1.10 (0.82-1.45) | 0.94 (0.81-1.08) | 0.95 (0.83-1.07) | 0.93 (0.81-1.07) |
| C vs TF     | 1.10 (0.85-1.40) | 1.18 (0.89-1.53) | 1.19 (0.91-1.55) | 1.18 (0.89-1.52) | 1.19 (0.90-1.54) | 1.24 (0.85-1.73) | 1.10 (0.83-1.40) | 1.10 (0.86-1.37) | —                |
| C vs CL     | 0.77 (0.60-0.98) | 0.74 (0.56-0.96) | 0.78 (0.59-0.98) | 0.75 (0.57-0.95) | 0.77 (0.59-0.99) | 0.90 (0.65-1.24) | 0.78 (0.59-0.99) | 0.78 (0.61-0.97) | —                |
| C vs A+CL   | 1.49 (0.63-2.93) | 1.48 (0.66-3.13) | 1.54 (0.64-3.08) | 1.57 (0.67-3.42) | 1.53 (0.62-3.30) | -                | 1.47 (0.62-3.04) | 1.49 (0.64-3.03) | —                |
| A+C vs TF   | 1.17 (0.90-1.52) | 1.28 (0.95-1.68) | 1.27 (0.96-1.66) | 1.27 (0.96-1.66) | 1.27 (0.95-1.67) | 1.13 (0.81-1.54) | 1.16 (0.88-1.50) | 1.16 (0.90-1.47) | —                |
| A+C vs CL   | 0.81 (0.63-1.05) | 0.79 (0.61-1.03) | 0.81 (0.63-1.05) | 0.79 (0.62-1.03) | 0.81 (0.63-1.05) | 0.81 (0.61-1.11) | 0.81 (0.63-1.05) | 0.81 (0.65-1.04) | —                |
| A+C vs A+CL | 1.58 (0.67-3.11) | 1.60 (0.72-3.33) | 1.63 (0.69-3.24) | 1.69 (0.73-3.59) | 1.63 (0.67-3.43) | —                | 1.55 (0.67-3.20) | 1.58 (0.70-3.19) | 1.49 (0.65-3.38) |
| TF vs CL    | 0.69 (0.51-0.98) | 0.62 (0.43-0.89) | 0.65 (0.47-0.91) | 0.63 (0.45-0.89) | 0.64 (0.46-0.92) | 0.72 (0.50-1.08) | 0.70 (0.50-1.00) | 0.70 (0.53-0.96) | —                |
| TF vs A+CL  | 1.16 (0.56-2.78) | 1.08 (0.54-2.70) | 1.09 (0.52-2.70) | 1.12 (0.55-3.03) | 1.08 (0.51-2.94) | —                | 1.14 (0.57-2.94) | 1.16 (0.57-2.86) | —                |
| CL vs A+CL  | 1.96 (0.79-3.99) | 2.02 (0.87-4.43) | 2.01 (0.81-4.18) | 2.13 (0.87-4.68) | 2.02 (0.79-4.43) | —                | 1.92 (0.79-4.11) | 1.93 (0.78-4.02) | —                |

Random effects model was used; A, aspirin; D, dipyridamole; P, placebo; TF, triflusal; TC, ticlopidine; CL, cilostazol; C, clopidogrel; A1, aspirin 30-50 mg daily; A2, aspirin 75-162 mg daily; A3, aspirin 283-330 mg daily; A4, aspirin 500-1500 mg daily; AD1, aspirin 50 mg plus dipyridamole 400 mg daily; AD2, aspirin 990-1300 mg plus dipyridamole 150-300 mg daily; for all of the table cells, odds ratios <1 favor the right regimens; for network meta-analysis, “—” indicates that the corresponding regimens were excluded by sensitivity analysis; for direct comparison, “—” indicates that no direct comparison is available; \*statistical heterogeneity was found (P-for-heterogeneity < 0.1 or I<sup>2</sup> > 50%).
