# Supplementary material for: Antiplatelet regimens in the long-term secondary prevention of transient ischaemic attack and ischaemic stroke: an updated network meta-analysis
Source: PubMed Central journal article supplement — BMJ Open. 2016 Mar 17;6(3):e009013. doi: 10.1136/bmjopen-2015-009013 (PMC4800132; doi:10.1136/bmjopen-2015-009013), 2016-03-17
Supplement: bmjopen-2015-009013supp_appendix7.pdf [file bmjopen-2015-009013supp_appendix7.pdf]

## Supplementary appendix 7. Main analysis, sensitivity analysis, and direct comparison for recurrent stroke.

### Main analysis, sensitivity analysis, and direct comparison for recurrent stroke.

| Comparisons | Network meta-analysis |                        |                            |                            |                      |                                        |                                   |                                |                  | Direct comparisons |
|-------------|-----------------------|------------------------|----------------------------|----------------------------|----------------------|----------------------------------------|-----------------------------------|--------------------------------|------------------|--------------------|
|             | All trials (n=33)     | Low risk of bias(n=27) | Allocation concealed(n=31) | Adjudication blinded(n=29) | Attrition bias(n=29) | Trials with ≥24 months follow-up(n=19) | Trials initiated after 1980(n=28) | A2=Aspirin 75-330mgdaily(n=33) |                  |                    |
| P vs D      | 0.87 (0.66-1.21)      | 0.88 (0.65-1.30)       | 0.87 (0.66-1.20)           | 0.88 (0.66-1.25)           | 0.87 (0.66-1.20)     | 0.83 (0.63-1.12)                       | 0.87 (0.63-1.28)                  | 0.87 (0.67-1.19)               | 0.82 (0.67-1.00) |                    |
| P vs A1     | 0.87 (0.64-1.18)      | 0.90 (0.63-1.27)       | 0.87 (0.65-1.18)           | 0.89 (0.64-1.23)           | 0.87 (0.65-1.18)     | 0.83 (0.62-1.09)                       | 0.88 (0.61-1.25)                  | 0.87 (0.65-1.16)               | 0.80 (0.66-0.97) |                    |
| P vs A2     | 0.78 (0.63-0.99)      | 0.76 (0.59-1.00)       | 0.78 (0.63-0.99)           | 0.75 (0.59-0.97)           | 0.78 (0.63-0.99)     | 0.81 (0.65-1.04)                       | 0.78 (0.61-1.01)                  | 0.78 (0.65-0.95)               | 0.82 (0.61-1.10) |                    |
| P vs A3     | 0.80 (0.61-1.04)      | 0.81 (0.60-1.08)       | 0.80 (0.60-1.04)           | 0.80 (0.60-1.05)           | 0.81 (0.61-1.05)     | 0.83 (0.62-1.10)                       | 0.80 (0.58-1.08)                  | —                              | 0.83 (0.62-1.10) |                    |
| P vs A4     | 0.82 (0.68-0.99)      | 0.86 (0.69-1.07)       | 0.82 (0.68-0.99)           | 0.83 (0.68-1.00)           | 0.85 (0.70-1.02)     | 0.90 (0.74-1.11)                       | 0.81 (0.58-1.08)                  | 0.82 (0.69-0.98)               | 0.84 (0.67-1.06) |                    |
| P vs AD1    | 0.69 (0.56-0.89)      | 0.72 (0.57-0.99)       | 0.69 (0.56-0.89)           | 0.71 (0.56-0.96)           | 0.69 (0.56-0.89)     | 0.62 (0.49-0.80)                       | 0.69 (0.54-0.93)                  | 0.69 (0.56-0.88)               | 0.59 (0.48-0.73) |                    |
| P vs AD2    | 0.63 (0.48-0.81)      | 0.69 (0.45-1.02)       | 0.63 (0.48-0.81)           | 0.63 (0.48-0.82)           | 0.63 (0.49-0.82)     | 0.68 (0.47-1.02)                       | 0.61 (0.40-0.89)                  | 0.63 (0.49-0.80)               | 0.58 (0.46-0.72) |                    |
| P vs TC     | 0.79 (0.62-0.99)      | 0.82 (0.63-1.06)       | 0.79 (0.62-0.99)           | 0.79 (0.62-1.01)           | 0.80 (0.63-1.01)     | 0.76 (0.58-0.99)                       | 0.78 (0.57-1.04)                  | 0.79 (0.62-0.99)               | 0.80 (0.58-1.11) |                    |
| P vs A+TC   | 0.74 (0.20-1.99)      | —                      | 0.72 (0.22-1.77)           | —                          | —                    | —                                      | 0.71 (0.20-1.82)                  | 0.71 (0.20-1.79)               | —                |                    |
| P vs C      | 0.68 (0.53-0.92)      | 0.70 (0.54-0.99)       | 0.68 (0.53-0.92)           | 0.69 (0.53-0.95)           | 0.68 (0.54-0.93)     | 0.60 (0.43-0.88)                       | 0.68 (0.51-0.97)                  | 0.68 (0.54-0.91)               | —                |                    |
| P vs A+C    | 0.65 (0.50-0.86)      | 0.65 (0.49-0.89)       | 0.65 (0.50-0.85)           | 0.65 (0.49-0.86)           | 0.65 (0.51-0.87)     | 0.68 (0.51-0.95)                       | 0.65 (0.48-0.89)                  | 0.65 (0.51-0.85)               | —                |                    |
| P vs TF     | 0.72 (0.48-1.05)      | 0.83 (0.52-1.29)       | 0.81 (0.52-1.22)           | 0.81 (0.51-1.23)           | 0.82 (0.53-1.22)     | 0.73 (0.46-1.07)                       | 0.72 (0.44-1.09)                  | 0.72 (0.50-0.99)               | —                |                    |
| P vs CL     | 0.51 (0.38-0.70)      | 0.50 (0.36-0.70)       | 0.51 (0.37-0.69)           | 0.49 (0.36-0.68)           | 0.51 (0.38-0.69)     | 0.53 (0.39-0.75)                       | 0.50 (0.36-0.70)                  | 0.51 (0.38-0.69)               | 0.50 (0.32-0.77) |                    |
| P vs A+CL   | 0.90 (0.39-2.69)      | 0.88 (0.37-2.78)       | 0.88 (0.38-2.70)           | 0.88 (0.38-2.78)           | 0.89 (0.39-2.86)     | —                                      | 0.88 (0.36-2.70)                  | 0.88 (0.37-2.70)               | —                |                    |
| D vs A1     | 0.99 (0.71-1.35)      | 1.00 (0.68-1.41)       | 0.99 (0.71-1.35)           | 0.99 (0.69-1.37)           | 0.99 (0.71-1.35)     | 0.99 (0.72-1.32)                       | 0.99 (0.67-1.43)                  | 0.99 (0.72-1.33)               | 0.98 (0.80-1.20) |                    |
| D vs A2     | 0.88 (0.63-1.25)      | 0.83 (0.56-1.25)       | 0.88 (0.63-1.23)           | 0.83 (0.57-1.22)           | 0.88 (0.63-1.23)     | 0.96 (0.69-1.37)                       | 0.87 (0.59-1.30)                  | 0.88 (0.65-1.22)               | —                |                    |
| D vs A3     | 0.92 (0.60-1.31)      | 0.91 (0.57-1.36)       | 0.91 (0.60-1.31)           | 0.90 (0.58-1.31)           | 0.92 (0.61-1.32)     | 1.00 (0.66-1.46)                       | 0.91 (0.56-1.38)                  | —                              | —                |                    |
| D vs A4     | 0.95 (0.65-1.31)      | 0.97 (0.63-1.40)       | 0.95 (0.65-1.31)           | 0.93 (0.63-1.31)           | 0.97 (0.67-1.34)     | 1.09 (0.76-1.52)                       | 0.93 (0.56-1.40)                  | 0.94 (0.67-1.29)               | —                |                    |
| D vs AD1    | 0.78 (0.58-1.08)      | 0.80 (0.58-1.16)       | 0.78 (0.58-1.08)           | 0.79 (0.58-1.12)           | 0.78 (0.59-1.08)     | 0.74 (0.55-1.00)                       | 0.78 (0.56-1.14)                  | 0.78 (0.59-1.06)               | 0.72 (0.58-0.90) |                    |
| D vs AD2    | 0.72 (0.47-1.04)      | 0.78 (0.44-1.26)       | 0.72 (0.48-1.04)           | 0.71 (0.46-1.04)           | 0.73 (0.48-1.05)     | 0.85 (0.51-1.34)                       | 0.70 (0.39-1.14)                  | 0.72 (0.48-1.03)               | —                |                    |

**Supplementary appendix 7. Main analysis, sensitivity analysis, and direct comparison for recurrent stroke.**

|            |                  |                  |                  |                  |                  |                  |                  |                  |                   |
|------------|------------------|------------------|------------------|------------------|------------------|------------------|------------------|------------------|-------------------|
| D vs TC    | 0.90 (0.61-1.28) | 0.92 (0.59-1.36) | 0.90 (0.61-1.28) | 0.89 (0.59-1.29) | 0.92 (0.62-1.30) | 0.92 (0.61-1.34) | 0.89 (0.55-1.35) | 0.90 (0.62-1.26) | —                 |
| D vs A+TC  | 0.84 (0.22-2.32) | —                | 0.83 (0.24-2.08) | —                | —                | —                | 0.81 (0.22-2.15) | 0.81 (0.22-2.09) | —                 |
| D vs C     | 0.80 (0.55-1.13) | 0.81 (0.53-1.20) | 0.79 (0.55-1.13) | 0.80 (0.54-1.15) | 0.80 (0.56-1.13) | 0.74 (0.49-1.08) | 0.80 (0.51-1.20) | 0.79 (0.56-1.11) | —                 |
| D vs A+C   | 0.76 (0.51-1.07) | 0.75 (0.47-1.10) | 0.76 (0.51-1.07) | 0.74 (0.48-1.06) | 0.76 (0.52-1.07) | 0.85 (0.55-1.25) | 0.76 (0.47-1.12) | 0.76 (0.52-1.06) | —                 |
| D vs TF    | 0.83 (0.49-1.29) | 0.93 (0.51-1.55) | 0.93 (0.54-1.48) | 0.91 (0.52-1.49) | 0.94 (0.55-1.49) | 0.88 (0.50-1.37) | 0.82 (0.45-1.35) | 0.82 (0.52-1.21) | —                 |
| D vs CL    | 0.60 (0.38-0.87) | 0.57 (0.34-0.87) | 0.59 (0.38-0.87) | 0.57 (0.35-0.85) | 0.59 (0.38-0.86) | 0.66 (0.42-0.98) | 0.59 (0.35-0.90) | 0.59 (0.39-0.86) | —                 |
| D vs A+CL  | 1.31 (0.43-3.15) | 1.28 (0.40-3.18) | 1.30 (0.42-3.18) | 1.29 (0.40-3.22) | 1.33 (0.43-3.35) | —                | 1.30 (0.40-3.19) | 1.30 (0.40-3.16) | —                 |
| A1 vs A2   | 0.90 (0.64-1.27) | 0.85 (0.57-1.28) | 0.90 (0.65-1.27) | 0.85 (0.58-1.25) | 0.90 (0.65-1.27) | 0.99 (0.71-1.41) | 0.88 (0.60-1.33) | 0.90 (0.67-1.23) | —                 |
| A1 vs A3   | 0.94 (0.62-1.34) | 0.93 (0.58-1.40) | 0.93 (0.61-1.34) | 0.92 (0.59-1.34) | 0.94 (0.63-1.35) | 1.02 (0.68-1.49) | 0.93 (0.57-1.42) | —                | —                 |
| A1 vs A4   | 0.97 (0.67-1.34) | 0.99 (0.65-1.44) | 0.97 (0.67-1.34) | 0.95 (0.64-1.34) | 0.99 (0.69-1.37) | 1.11 (0.78-1.55) | 0.95 (0.57-1.44) | 0.97 (0.68-1.32) | —                 |
| A1 vs AD1  | 0.80 (0.60-1.10) | 0.81 (0.59-1.19) | 0.79 (0.60-1.10) | 0.81 (0.60-1.15) | 0.80 (0.60-1.10) | 0.75 (0.56-1.02) | 0.79 (0.57-1.16) | 0.80 (0.60-1.09) | 0.74 (0.59-0.92)  |
| A1 vs AD2  | 0.74 (0.48-1.06) | 0.79 (0.45-1.29) | 0.74 (0.49-1.06) | 0.73 (0.47-1.07) | 0.74 (0.49-1.07) | 0.82 (0.52-1.37) | 0.72 (0.40-1.17) | 0.74 (0.49-1.06) | —                 |
| A1 vs TC   | 0.89 (0.62-1.32) | 0.89 (0.60-1.39) | 0.89 (0.63-1.32) | 0.88 (0.60-1.32) | 0.90 (0.64-1.33) | 0.90 (0.63-1.37) | 0.87 (0.56-1.39) | 0.89 (0.64-1.30) | —                 |
| A1 vs A+TC | 0.61 (0.22-2.38) | —                | 0.62 (0.24-2.13) | —                | —                | —                | 0.59 (0.22-2.22) | 0.60 (0.23-2.13) | —                 |
| A1 vs C    | 0.79 (0.56-1.15) | 0.79 (0.54-1.23) | 0.79 (0.56-1.15) | 0.79 (0.55-1.18) | 0.79 (0.57-1.16) | 0.73 (0.51-1.10) | 0.78 (0.52-1.23) | 0.79 (0.57-1.14) | —                 |
| A1 vs A+C  | 0.75 (0.52-1.09) | 0.73 (0.48-1.12) | 0.75 (0.52-1.09) | 0.73 (0.49-1.09) | 0.75 (0.53-1.10) | 0.83 (0.56-1.28) | 0.74 (0.48-1.15) | 0.75 (0.53-1.08) | —                 |
| A1 vs TF   | 0.80 (0.50-1.32) | 0.88 (0.52-1.59) | 0.88 (0.55-1.52) | 0.87 (0.53-1.54) | 0.90 (0.56-1.52) | 0.84 (0.52-1.39) | 0.78 (0.45-1.39) | 0.81 (0.53-1.25) | —                 |
| A1 vs CL   | 0.58 (0.39-0.88) | 0.55 (0.35-0.88) | 0.58 (0.39-0.88) | 0.56 (0.36-0.87) | 0.58 (0.39-0.88) | 0.65 (0.43-0.99) | 0.57 (0.36-0.92) | 0.58 (0.40-0.88) | —                 |
| A1 vs A+CL | 1.03 (0.44-3.23) | 0.98 (0.40-3.23) | 1.01 (0.43-3.23) | 1.00 (0.41-3.33) | 1.03 (0.44-3.45) | —                | 1.01 (0.40-3.23) | 1.02 (0.41-3.23) | —                 |
| A2 vs A3   | 1.02 (0.75-1.37) | 1.07 (0.76-1.47) | 1.02 (0.74-1.37) | 1.05 (0.75-1.44) | 1.03 (0.76-1.37) | 1.02 (0.73-1.37) | 1.02 (0.72-1.41) | —                | —                 |
| A2 vs A4   | 1.05 (0.79-1.39) | 1.14 (0.82-1.56) | 1.06 (0.79-1.38) | 1.10 (0.80-1.47) | 1.08 (0.81-1.42) | 1.11 (0.82-1.48) | 1.04 (0.70-1.47) | 1.05 (0.82-1.32) | —                 |
| A2 vs AD1  | 0.89 (0.72-1.12) | 0.97 (0.72-1.33) | 0.89 (0.72-1.11) | 0.96 (0.72-1.30) | 0.89 (0.72-1.11) | 0.76 (0.58-0.98) | 0.90 (0.71-1.17) | 0.89 (0.73-1.09) | 1.05 (0.56-1.96)* |
| A2 vs AD2  | 0.81 (0.56-1.12) | 0.91 (0.55-1.44) | 0.80 (0.56-1.12) | 0.84 (0.57-1.19) | 0.81 (0.57-1.12) | 0.87 (0.54-1.32) | 0.79 (0.48-1.23) | 0.80 (0.58-1.08) | —                 |
| A2 vs TC   | 1.01 (0.73-1.36) | 1.08 (0.75-1.51) | 1.01 (0.74-1.36) | 1.05 (0.75-1.45) | 1.02 (0.74-1.37) | 0.93 (0.65-1.31) | 1.00 (0.69-1.41) | 1.00 (0.76-1.30) | —                 |
| A2 vs A+TC | 0.94 (0.25-2.63) | —                | 0.93 (0.27-2.30) | —                | —                | —                | 0.91 (0.25-2.35) | 0.90 (0.26-2.28) | —                 |

**Supplementary appendix 7. Main analysis, sensitivity analysis, and direct comparison for recurrent stroke.**

|            |                  |                  |                  |                  |                  |                  |                  |                  |                   |
|------------|------------------|------------------|------------------|------------------|------------------|------------------|------------------|------------------|-------------------|
| A2 vs C    | 0.89 (0.68-1.17) | 0.95 (0.69-1.31) | 0.88 (0.68-1.16) | 0.93 (0.69-1.27) | 0.89 (0.69-1.17) | 0.76 (0.52-1.07) | 0.89 (0.66-1.22) | 0.88 (0.70-1.13) | —                 |
| A2 vs A+C  | 0.84 (0.66-1.07) | 0.87 (0.66-1.13) | 0.84 (0.66-1.06) | 0.87 (0.66-1.11) | 0.84 (0.66-1.07) | 0.86 (0.63-1.13) | 0.84 (0.64-1.09) | 0.84 (0.68-1.02) | 0.77 (0.60-0.99)  |
| A2 vs TF   | 0.92 (0.59-1.36) | 1.09 (0.66-1.73) | 1.03 (0.65-1.58) | 1.07 (0.66-1.68) | 1.04 (0.66-1.58) | 0.89 (0.54-1.33) | 0.92 (0.56-1.41) | 0.91 (0.67-1.19) | —                 |
| A2 vs CL   | 0.66 (0.49-0.86) | 0.66 (0.48-0.88) | 0.66 (0.49-0.86) | 0.66 (0.49-0.87) | 0.66 (0.49-0.85) | 0.67 (0.48-0.89) | 0.65 (0.47-0.88) | 0.66 (0.49-0.85) | 0.66 (0.50-0.86)  |
| A2 vs A+CL | 1.46 (0.50-3.38) | 1.49 (0.49-3.62) | 1.44 (0.49-3.45) | 1.50 (0.51-3.65) | 1.47 (0.50-3.65) | —                | 1.45 (0.47-3.42) | 1.44 (0.47-3.40) | 1.03 (0.06-16.7)  |
| A3 vs A4   | 1.05 (0.78-1.38) | 1.08 (0.77-1.48) | 1.05 (0.78-1.39) | 1.06 (0.77-1.40) | 1.07 (0.79-1.41) | 1.10 (0.81-1.47) | 1.03 (0.71-1.44) | —                | 1.00 (0.74-1.34)  |
| A3 vs AD1  | 0.87 (0.65-1.22) | 0.89 (0.65-1.33) | 0.87 (0.65-1.22) | 0.90 (0.66-1.32) | 0.86 (0.65-1.20) | 0.75 (0.53-1.08) | 0.88 (0.63-1.30) | —                | —                 |
| A3 vs AD2  | 0.80 (0.55-1.13) | 0.87 (0.52-1.36) | 0.80 (0.55-1.13) | 0.81 (0.55-1.15) | 0.80 (0.55-1.13) | 0.82 (0.53-1.33) | 0.78 (0.46-1.27) | —                | —                 |
| A3 vs TC   | 0.97 (0.71-1.37) | 0.99 (0.71-1.45) | 0.98 (0.71-1.37) | 0.98 (0.71-1.41) | 0.98 (0.72-1.37) | 0.90 (0.64-1.32) | 0.96 (0.68-1.43) | —                | —                 |
| A3 vs A+TC | 0.67 (0.25-2.56) | —                | 0.68 (0.27-2.33) | —                | —                | —                | 0.65 (0.25-2.38) | —                | —                 |
| A3 vs C    | 0.86 (0.64-1.22) | 0.88 (0.63-1.30) | 0.86 (0.64-1.22) | 0.88 (0.65-1.27) | 0.85 (0.64-1.20) | 0.72 (0.48-1.15) | 0.86 (0.62-1.30) | —                | —                 |
| A3 vs A+C  | 0.82 (0.63-1.09) | 0.81 (0.61-1.11) | 0.82 (0.63-1.09) | 0.82 (0.62-1.10) | 0.82 (0.63-1.09) | 0.83 (0.63-1.12) | 0.82 (0.60-1.14) | —                | 0.89 (0.69-1.14)  |
| A3 vs TF   | 0.88 (0.67-1.19) | 0.99 (0.71-1.43) | 0.99 (0.73-1.39) | 0.99 (0.72-1.41) | 0.99 (0.73-1.39) | 0.85 (0.62-1.16) | 0.88 (0.64-1.22) | —                | 0.87 (0.59-1.29)  |
| A3 vs CL   | 0.64 (0.44-0.93) | 0.61 (0.42-0.92) | 0.64 (0.44-0.93) | 0.62 (0.43-0.93) | 0.63 (0.44-0.92) | 0.65 (0.43-0.98) | 0.63 (0.43-0.96) | —                | 0.54 (1.78-1.62)  |
| A3 vs A+CL | 1.14 (0.49-3.33) | 1.10 (0.46-3.45) | 1.11 (0.48-3.45) | 1.12 (0.48-3.57) | 1.12 (0.48-3.57) | —                | 1.11 (0.46-3.45) | —                | —                 |
| A4 vs AD1  | 0.84 (0.65-1.14) | 0.84 (0.62-1.20) | 0.83 (0.65-1.14) | 0.86 (0.66-1.22) | 0.82 (0.63-1.11) | 0.68 (0.51-0.94) | 0.86 (0.61-1.30) | 0.84 (0.66-1.11) | —                 |
| A4 vs AD2  | 0.77 (0.58-1.01) | 0.80 (0.53-1.15) | 0.77 (0.58-1.00) | 0.77 (0.57-1.01) | 0.75 (0.57-0.99) | 0.76 (0.54-1.10) | 0.77 (0.45-1.25) | 0.77 (0.58-1.00) | 0.84 (0.59-1.19)  |
| A4 vs TC   | 0.95 (0.78-1.18) | 0.93 (0.75-1.19) | 0.94 (0.78-1.18) | 0.95 (0.77-1.19) | 0.93 (0.77-1.16) | 0.83 (0.66-1.09) | 0.95 (0.75-1.25) | 0.94 (0.78-1.18) | 1.00 (0.62-1.60)* |
| A4 vs A+TC | 0.65 (0.24-2.44) | —                | 0.66 (0.27-2.13) | —                | —                | —                | 0.65 (0.25-2.27) | 0.64 (0.25-2.13) | —                 |
| A4 vs C    | 0.83 (0.63-1.15) | 0.82 (0.60-1.19) | 0.83 (0.63-1.15) | 0.84 (0.63-1.19) | 0.81 (0.62-1.12) | 0.67 (0.45-1.02) | 0.85 (0.60-1.30) | 0.83 (0.64-1.14) | —                 |
| A4 vs A+C  | 0.79 (0.59-1.08) | 0.76 (0.55-1.08) | 0.79 (0.59-1.08) | 0.78 (0.58-1.09) | 0.78 (0.58-1.05) | 0.76 (0.55-1.10) | 0.80 (0.56-1.20) | 0.79 (0.60-1.08) | —                 |
| A4 vs TF   | 0.85 (0.57-1.30) | 0.91 (0.58-1.52) | 0.93 (0.63-1.49) | 0.93 (0.62-1.52) | 0.93 (0.62-1.47) | 0.77 (0.50-1.19) | 0.85 (0.54-1.41) | 0.85 (0.60-1.23) | —                 |
| A4 vs CL   | 0.62 (0.44-0.88) | 0.57 (0.40-0.85) | 0.61 (0.44-0.88) | 0.60 (0.42-0.87) | 0.60 (0.43-0.86) | 0.59 (0.41-0.87) | 0.62 (0.41-0.97) | 0.62 (0.45-0.87) | —                 |
| A4 vs A+CL | 1.09 (0.47-3.33) | 1.02 (0.43-3.33) | 1.06 (0.46-3.33) | 1.08 (0.46-3.45) | 1.06 (0.46-3.45) | —                | 1.10 (0.44-3.45) | 1.08 (0.44-3.33) | —                 |
| AD1 vs AD2 | 0.91 (0.63-1.25) | 0.95 (0.56-1.48) | 0.91 (0.63-1.25) | 0.88 (0.59-1.23) | 0.92 (0.64-1.25) | 1.15 (0.71-1.77) | 0.88 (0.52-1.37) | 0.91 (0.64-1.23) | —                 |

**Supplementary appendix 7. Main analysis, sensitivity analysis, and direct comparison for recurrent stroke.**

|              |                  |                  |                  |                  |                  |                  |                  |                  |                  |
|--------------|------------------|------------------|------------------|------------------|------------------|------------------|------------------|------------------|------------------|
| AD1 vs TC    | 1.14 (0.82-1.51) | 1.12 (0.77-1.54) | 1.14 (0.83-1.51) | 1.11 (0.77-1.50) | 1.15 (0.84-1.53) | 1.23 (0.85-1.75) | 1.12 (0.76-1.57) | 1.14 (0.84-1.50) | —                |
| AD1 vs A+TC  | 1.06 (0.28-2.92) | —                | 1.05 (0.31-2.57) | —                | —                | —                | 1.02 (0.28-2.63) | 1.02 (0.29-2.58) | —                |
| AD1 vs C     | 1.00 (0.79-1.25) | 0.99 (0.74-1.27) | 1.00 (0.79-1.25) | 0.98 (0.75-1.24) | 1.00 (0.80-1.25) | 0.99 (0.76-1.27) | 1.00 (0.75-1.30) | 1.00 (0.80-1.24) | 0.98 (0.89-1.08) |
| AD1 vs A+C   | 0.95 (0.71-1.22) | 0.92 (0.64-1.21) | 0.95 (0.71-1.21) | 0.92 (0.65-1.19) | 0.96 (0.72-1.21) | 1.14 (0.78-1.61) | 0.95 (0.67-1.24) | 0.95 (0.73-1.20) | —                |
| AD1 vs TF    | 1.04 (0.65-1.54) | 1.14 (0.66-1.80) | 1.17 (0.72-1.77) | 1.13 (0.67-1.75) | 1.18 (0.73-1.78) | 1.17 (0.70-1.81) | 1.03 (0.60-1.58) | 1.04 (0.71-1.43) | —                |
| AD1 vs CL    | 0.75 (0.52-1.02) | 0.70 (0.45-1.00) | 0.75 (0.52-1.01) | 0.71 (0.47-0.99) | 0.75 (0.52-1.01) | 0.89 (0.60-1.26) | 0.74 (0.49-1.03) | 0.75 (0.53-1.02) | —                |
| AD1 vs A+CL  | 1.65 (0.56-3.84) | 1.57 (0.51-3.79) | 1.63 (0.55-3.92) | 1.59 (0.52-3.87) | 1.67 (0.57-4.13) | —                | 1.63 (0.53-3.88) | 1.64 (0.53-3.87) | —                |
| AD2 vs TC    | 1.23 (0.91-1.72) | 1.16 (0.78-1.89) | 1.23 (0.91-1.72) | 1.25 (0.90-1.75) | 1.25 (0.92-1.75) | 1.11 (0.71-1.67) | 1.25 (0.78-2.13) | 1.23 (0.92-1.72) | —                |
| AD2 vs A+TC  | 0.85 (0.31-3.23) | —                | 0.86 (0.34-2.86) | —                | —                | —                | 0.85 (0.31-3.23) | 0.83 (0.32-2.94) | —                |
| AD2 vs C     | 1.09 (0.78-1.61) | 1.03 (0.65-1.75) | 1.09 (0.78-1.61) | 1.10 (0.78-1.67) | 1.09 (0.78-1.61) | 0.85 (0.52-1.47) | 1.12 (0.70-1.96) | 1.09 (0.78-1.59) | —                |
| AD2 vs A+C   | 1.03 (0.74-1.52) | 0.95 (0.60-1.59) | 1.03 (0.73-1.52) | 1.03 (0.71-1.52) | 1.03 (0.74-1.52) | 0.97 (0.62-1.64) | 1.06 (0.65-1.82) | 1.04 (0.74-1.49) | —                |
| AD2 vs TF    | 1.11 (0.71-1.79) | 1.14 (0.66-2.17) | 1.23 (0.78-2.08) | 1.22 (0.77-2.08) | 1.23 (0.79-2.04) | 1.06 (0.58-1.79) | 1.12 (0.63-2.13) | 1.11 (0.74-1.72) | —                |
| AD2 vs CL    | 0.81 (0.55-1.22) | 0.72 (0.44-1.25) | 0.81 (0.55-1.22) | 0.78 (0.53-1.20) | 0.80 (0.55-1.20) | 0.76 (0.47-1.30) | 0.82 (0.50-1.41) | 0.81 (0.56-1.20) | —                |
| AD2 vs A+CL  | 1.43 (0.61-4.35) | 1.28 (0.51-4.55) | 1.39 (0.59-4.55) | 1.41 (0.59-4.55) | 1.41 (0.62-4.76) | —                | 1.45 (0.57-4.76) | 1.41 (0.58-4.55) | —                |
| TC vs A+TC   | 0.93 (0.26-2.46) | —                | 0.92 (0.29-2.20) | —                | —                | —                | 0.91 (0.27-2.27) | 0.90 (0.27-2.23) | 0.80 (0.29-2.22) |
| TC vs C      | 0.87 (0.65-1.22) | 0.87 (0.63-1.27) | 0.87 (0.65-1.22) | 0.88 (0.65-1.25) | 0.86 (0.65-1.19) | 0.79 (0.52-1.25) | 0.88 (0.63-1.30) | 0.87 (0.65-1.20) | 1.06 (0.62-1.84) |
| TC vs A+C    | 0.83 (0.61-1.16) | 0.81 (0.56-1.16) | 0.83 (0.60-1.16) | 0.82 (0.59-1.16) | 0.82 (0.60-1.15) | 0.90 (0.62-1.37) | 0.83 (0.58-1.23) | 0.83 (0.61-1.15) | —                |
| TC vs TF     | 0.93 (0.58-1.39) | 1.03 (0.61-1.65) | 1.04 (0.64-1.61) | 1.03 (0.63-1.62) | 1.04 (0.64-1.58) | 0.97 (0.57-1.49) | 0.94 (0.55-1.47) | 0.92 (0.61-1.33) | —                |
| TC vs CL     | 0.65 (0.45-0.95) | 0.61 (0.41-0.93) | 0.64 (0.45-0.94) | 0.62 (0.43-0.93) | 0.63 (0.44-0.93) | 0.70 (0.47-1.09) | 0.64 (0.43-1.00) | 0.65 (0.45-0.94) | —                |
| TC vs A+CL   | 1.14 (0.50-3.57) | 1.08 (0.44-3.45) | 1.12 (0.48-3.57) | 1.12 (0.47-3.57) | 1.12 (0.48-3.70) | —                | 1.14 (0.46-3.57) | 1.12 (0.46-3.45) | —                |
| A+TC vs C    | 0.93 (0.34-3.57) | —                | 0.94 (0.38-3.23) | —                | —                | —                | 0.97 (0.37-3.57) | 0.97 (0.38-3.45) | —                |
| A+TC vs A+C  | 0.88 (0.32-3.33) | —                | 0.90 (0.36-3.13) | —                | —                | —                | 0.92 (0.35-3.33) | 0.93 (0.36-3.33) | —                |
| A+TC vs TF   | 1.36 (0.33-3.77) | —                | 1.49 (0.41-3.89) | —                | —                | —                | 1.38 (0.36-3.72) | 1.37 (0.38-3.61) | —                |
| A+TC vs CL   | 0.69 (0.25-2.63) | —                | 0.70 (0.28-2.44) | —                | —                | —                | 0.70 (0.26-2.63) | 0.71 (0.28-2.63) | —                |
| A+TC vs A+CL | 1.23 (0.39-7.14) | —                | 1.22 (0.38-6.67) | —                | —                | —                | 1.23 (0.37-7.14) | 1.25 (0.38-7.14) | —                |

**Supplementary appendix 7. Main analysis, sensitivity analysis, and direct comparison for recurrent stroke.**

|             |                  |                  |                  |                  |                  |                  |                  |                  |                  |
|-------------|------------------|------------------|------------------|------------------|------------------|------------------|------------------|------------------|------------------|
| C vs A+C    | 0.96 (0.73-1.20) | 0.93 (0.68-1.20) | 0.96 (0.73-1.19) | 0.94 (0.70-1.18) | 0.96 (0.74-1.19) | 1.17 (0.73-1.77) | 0.95 (0.69-1.23) | 0.96 (0.74-1.19) | 0.98 (0.83-1.14) |
| C vs TF     | 1.05 (0.65-1.56) | 1.16 (0.68-1.84) | 1.18 (0.72-1.80) | 1.16 (0.69-1.81) | 1.19 (0.73-1.79) | 1.20 (0.66-1.95) | 1.04 (0.61-1.61) | 1.05 (0.69-1.47) | —                |
| C vs CL     | 0.76 (0.51-1.05) | 0.72 (0.46-1.03) | 0.75 (0.51-1.05) | 0.72 (0.48-1.03) | 0.75 (0.51-1.04) | 0.91 (0.56-1.37) | 0.75 (0.48-1.08) | 0.76 (0.51-1.04) | —                |
| C vs A+CL   | 1.66 (0.57-3.86) | 1.60 (0.52-3.88) | 1.64 (0.55-3.95) | 1.63 (0.54-3.96) | 1.67 (0.57-4.14) | —                | 1.65 (0.53-3.88) | 1.65 (0.53-3.89) | —                |
| A+C vs TF   | 1.10 (0.72-1.60) | 1.25 (0.78-1.96) | 1.23 (0.79-1.86) | 1.24 (0.78-1.90) | 1.24 (0.80-1.85) | 1.05 (0.65-1.54) | 1.10 (0.68-1.66) | 1.09 (0.76-1.51) | —                |
| A+C vs CL   | 0.77 (0.55-1.10) | 0.75 (0.52-1.10) | 0.77 (0.55-1.10) | 0.75 (0.53-1.10) | 0.76 (0.55-1.09) | 0.76 (0.52-1.16) | 0.76 (0.53-1.14) | 0.77 (0.56-1.09) | —                |
| A+C vs A+CL | 1.73 (0.62-3.93) | 1.71 (0.58-4.07) | 1.72 (0.60-4.06) | 1.74 (0.60-4.16) | 1.74 (0.61-4.25) | —                | 1.73 (0.58-3.99) | 1.72 (0.57-3.99) | 1.55 (0.59-4.07) |
| TF vs CL    | 0.70 (0.45-1.15) | 0.60 (0.36-1.04) | 0.63 (0.39-1.05) | 0.61 (0.38-1.04) | 0.62 (0.39-1.04) | 0.74 (0.46-1.28) | 0.70 (0.44-1.22) | 0.71 (0.49-1.08) | —                |
| TF vs A+CL  | 1.25 (0.53-3.85) | 1.08 (0.43-3.70) | 1.10 (0.45-3.70) | 1.10 (0.45-3.70) | 1.10 (0.46-3.70) | —                | 1.23 (0.50-4.17) | 1.23 (0.51-4.00) | —                |
| CL vs A+CL  | 2.25 (0.74-5.39) | 2.30 (0.72-5.70) | 2.23 (0.73-5.44) | 2.31 (0.74-5.72) | 2.28 (0.75-5.73) | —                | 2.27 (0.71-5.52) | 2.24 (0.72-5.41) | —                |

Random effects model was used; A, aspirin; D, dipyridamole; AD, aspirin plus dipyridamole; P, placebo; TF, triflusal; TC, ticlopidine; CL, cilostazol; C, clopidogrel; A1, aspirin 30-50 mg daily; A2, aspirin 75-162 mg daily; A3, aspirin 283-330 mg daily; A4, aspirin 500-1500 mg daily; AD1, aspirin 50 mg plus dipyridamole 400 mg daily; AD2, aspirin 990-1300 mg plus dipyridamole 150-300 mg daily; for all of the table cells, odds ratios <1 favor the right regimens; for network meta-analysis, “—” indicates that the corresponding regimens were excluded by sensitivity analysis; for direct comparison, “—” indicates that no direct comparison is available; \*statistical heterogeneity was found (P-for-heterogeneity < 0.1 or I<sup>2</sup> >50%).
