# Supplementary material for: Antiplatelet regimens in the long-term secondary prevention of transient ischaemic attack and ischaemic stroke: an updated network meta-analysis
Source: PubMed Central journal article supplement — BMJ Open. 2016 Mar 17;6(3):e009013. doi: 10.1136/bmjopen-2015-009013 (PMC4800132; doi:10.1136/bmjopen-2015-009013), 2016-03-17
Supplement: bmjopen-2015-009013supp_appendix8.pdf [file bmjopen-2015-009013supp_appendix8.pdf]

## Supplementary appendix 8. Main analysis, sensitivity analysis, and direct comparison for any bleeding.

### Main analysis, sensitivity analysis, and direct comparison for any bleeding.

| Comparisons | Network meta-analysis |                        |                            |                            |                      |                                        |                                   |                                  |                  | Direct comparisons |
|-------------|-----------------------|------------------------|----------------------------|----------------------------|----------------------|----------------------------------------|-----------------------------------|----------------------------------|------------------|--------------------|
|             | All trials (n=30)     | Low risk of bias(n=26) | Allocation concealed(n=29) | Adjudication blinded(n=27) | Attrition bias(n=29) | Trials with ≥24 months follow-up(n=19) | Trials initiated after 1980(n=25) | A2=Aspirin 75-330 mg daily(n=33) |                  |                    |
| P vs D      | 0.97 (0.65-1.54)      | 0.98 (0.65-1.54)       | 0.97 (0.65-1.52)           | 0.98 (0.66-1.56)           | 0.96 (0.65-1.52)     | 0.93 (0.62-1.45)                       | 0.97 (0.64-1.56)                  | 0.97 (0.66-1.52)                 | 1.04 (0.75-1.44) |                    |
| P vs A1     | 1.72 (1.18-2.40)      | 1.71 (1.18-2.38)       | 1.71 (1.19-2.39)           | 1.73 (1.20-2.41)           | 1.69 (1.18-2.34)     | 1.69 (1.16-2.33)                       | 1.72 (1.17-2.43)                  | 1.72 (1.21-2.37)                 | 1.90 (1.42-2.54) |                    |
| P vs A2     | 2.33 (1.73-3.30)      | 2.22 (1.64-3.13)       | 2.33 (1.72-3.33)           | 2.27 (1.67-3.23)           | 2.33 (1.72-3.23)     | 2.38 (1.72-3.45)                       | 2.33 (1.72-3.33)                  | 2.33 (1.79-3.03)                 | 2.33 (1.41-3.94) |                    |
| P vs A3     | 2.33 (1.65-3.19)      | 2.28 (1.61-3.10)       | 2.34 (1.66-3.20)           | 2.33 (1.64-3.18)           | 2.29 (1.60-3.11)     | 2.44 (1.67-3.34)                       | 2.34 (1.62-3.25)                  | —                                | 2.14 (1.33-3.42) |                    |
| P vs A4     | 2.69 (1.86-3.81)      | 2.54 (1.73-3.57)       | 2.71 (1.88-3.81)           | 2.71 (1.86-3.78)           | 2.55 (1.74-3.55)     | 2.67 (1.78-3.75)                       | 2.71 (1.75-4.01)                  | 2.72 (1.91-3.77)                 | 2.48 (1.31-4.68) |                    |
| P vs AD1    | 1.95 (1.43-2.78)      | 2.00 (1.47-2.78)       | 1.96 (1.45-2.70)           | 2.00 (1.47-2.86)           | 1.92 (1.43-2.70)     | 1.75 (1.25-2.56)                       | 1.96 (1.43-2.78)                  | 1.96 (1.45-2.63)                 | 2.04 (1.52-2.72) |                    |
| P vs AD2    | 2.49 (1.31-4.41)      | 2.38 (1.24-4.19)       | 2.52 (1.31-4.45)           | 2.53 (1.31-4.48)           | 2.38 (1.24-4.13)     | 2.27 (1.28-4.35)                       | —                                 | 2.53 (1.34-4.38)                 | 4.17 (0.87-19.9) |                    |
| P vs TC     | 2.12 (1.35-3.09)      | 2.04 (1.29-2.97)       | 2.13 (1.36-3.10)           | 2.14 (1.35-3.10)           | 2.04 (1.29-2.96)     | 2.37 (1.47-3.53)                       | 2.11 (1.29-3.12)                  | 2.14 (1.39-3.06)                 | 2.11 (1.18-3.77) |                    |
| P vs A+TC   | 2.71 (0.60-7.83)      | —                      | 2.78 (0.60-8.25)           | —                          | —                    | —                                      | 2.67 (0.59-7.73)                  | 2.77 (0.59-8.61)                 | —                |                    |
| P vs C      | 1.79 (1.23-2.78)      | 1.75 (1.23-2.70)       | 1.75 (1.23-2.70)           | 1.79 (1.23-2.78)           | 1.75 (1.22-2.63)     | 1.61 (0.98-2.70)                       | 1.79 (1.20-2.78)                  | 1.75 (1.25-2.63)                 | —                |                    |
| P vs A+C    | 5.00 (3.70-7.69)      | 5.00 (3.57-7.14)       | 5.00 (3.70-7.69)           | 5.00 (3.57-7.69)           | 5.00 (3.57-7.69)     | 4.76 (3.23-7.14)                       | 5.00 (3.70-7.69)                  | 5.00 (3.70-7.14)                 | —                |                    |
| P vs TF     | 1.24 (0.69-1.90)      | 1.28 (0.73-1.98)       | 1.31 (0.75-2.04)           | 1.31 (0.74-2.03)           | 1.29 (0.74-2.00)     | 1.38 (0.74-2.12)                       | 1.23 (0.67-1.91)                  | 1.26 (0.76-1.84)                 | —                |                    |
| P vs CL     | 1.18 (0.80-1.79)      | 1.14 (0.79-1.72)       | 1.18 (0.81-1.79)           | 1.15 (0.79-1.75)           | 1.16 (0.80-1.75)     | 0.96 (0.60-1.67)                       | 1.18 (0.80-1.82)                  | 1.18 (0.81-1.75)                 | 1.06 (0.55-2.04) |                    |
| P vs A+CL   | 1.47 (0.39-9.09)      | 1.41 (0.37-9.09)       | 1.56 (0.45-9.09)           | 1.43 (0.36-10.0)           | 1.45 (0.38-9.09)     | —                                      | 1.59 (0.45-10.0)                  | 1.56 (0.45-9.09)                 | —                |                    |
| D vs A1     | 1.73 (1.09-2.60)      | 1.72 (1.09-2.56)       | 1.73 (1.10-2.59)           | 1.73 (1.09-2.57)           | 1.73 (1.10-2.57)     | 1.78 (1.14-2.65)                       | 1.73 (1.08-2.63)                  | 1.74 (1.14-2.56)                 | 1.83 (1.37-2.44) |                    |
| D vs A2     | 2.33 (1.52-3.85)      | 2.17 (1.43-3.57)       | 2.33 (1.54-3.70)           | 2.22 (1.43-3.70)           | 2.33 (1.54-3.70)     | 2.50 (1.56-4.17)                       | 2.33 (1.49-3.85)                  | 2.33 (1.56-3.57)                 | —                |                    |
| D vs A3     | 2.37 (1.43-3.68)      | 2.30 (1.39-3.54)       | 2.37 (1.45-3.66)           | 2.34 (1.40-3.60)           | 2.34 (1.43-3.59)     | 2.59 (1.54-4.04)                       | 2.37 (1.41-3.73)                  | —                                | —                |                    |
| D vs A4     | 2.75 (1.56-4.51)      | 2.58 (1.45-4.19)       | 2.77 (1.58-4.52)           | 2.74 (1.54-4.44)           | 2.62 (1.48-4.23)     | 2.85 (1.58-4.65)                       | 2.76 (1.50-4.69)                  | 2.78 (1.63-4.46)                 | —                |                    |
| D vs AD1    | 1.92 (1.30-3.03)      | 1.96 (1.33-3.13)       | 1.92 (1.32-3.03)           | 1.96 (1.33-3.13)           | 1.92 (1.32-3.03)     | 1.82 (1.22-2.86)                       | 1.92 (1.28-3.03)                  | 1.96 (1.33-2.94)                 | 1.96 (1.47-2.61) |                    |
| D vs AD2    | 2.55 (1.17-4.97)      | 2.42 (1.10-4.68)       | 2.58 (1.18-5.02)           | 2.56 (1.16-4.96)           | 2.46 (1.12-4.69)     | 2.66 (1.20-5.13)                       | —                                 | 2.59 (1.21-4.91)                 | —                |                    |

**Supplementary appendix 8. Main analysis, sensitivity analysis, and direct comparison for any bleeding.**

|            |                  |                  |                  |                  |                  |                  |                  |                  |                   |
|------------|------------------|------------------|------------------|------------------|------------------|------------------|------------------|------------------|-------------------|
| D vs TC    | 2.17 (1.15-3.58) | 2.07 (1.09-3.42) | 2.18 (1.15-3.59) | 2.16 (1.13-3.56) | 2.10 (1.11-3.44) | 2.53 (1.32-4.30) | 2.15 (1.11-3.65) | 2.19 (1.19-3.55) | —                 |
| D vs A+TC  | 2.77 (0.57-8.34) | —                | 2.84 (0.56-8.74) | —                | —                | —                | 2.72 (0.55-8.02) | 2.84 (0.56-8.94) | —                 |
| D vs C     | 1.87 (1.12-3.06) | 1.85 (1.10-2.98) | 1.86 (1.12-3.01) | 1.86 (1.11-3.02) | 1.86 (1.12-2.98) | 1.81 (0.99-3.03) | 1.87 (1.10-3.09) | 1.86 (1.14-2.93) | —                 |
| D vs A+C   | 5.34 (3.26-8.63) | 5.14 (3.13-8.31) | 5.34 (3.29-8.56) | 5.17 (3.14-8.41) | 5.31 (3.30-8.48) | 5.29 (2.96-8.63) | 5.37 (3.22-8.79) | 5.31 (3.33-8.36) | —                 |
| D vs TF    | 1.26 (0.62-2.09) | 1.30 (0.65-2.18) | 1.33 (0.68-2.25) | 1.32 (0.66-2.21) | 1.32 (0.67-2.20) | 1.47 (0.71-2.46) | 1.25 (0.61-2.10) | 1.28 (0.69-2.03) | —                 |
| D vs CL    | 1.24 (0.71-2.05) | 1.20 (0.68-1.97) | 1.25 (0.71-2.05) | 1.21 (0.68-1.99) | 1.24 (0.71-2.02) | 1.10 (0.56-1.96) | 1.25 (0.70-2.08) | 1.24 (0.72-2.01) | —                 |
| D vs A+CL  | 2.81 (0.38-9.20) | 2.75 (0.37-9.26) | 2.96 (0.44-9.75) | 2.86 (0.35-10.0) | 2.87 (0.38-9.48) | —                | 2.97 (0.44-9.98) | 2.91 (0.44-9.75) | —                 |
| A1 vs A2   | 1.37 (0.97-2.08) | 1.32 (0.93-2.00) | 1.37 (0.98-2.04) | 1.32 (0.93-2.00) | 1.39 (0.99-2.04) | 1.45 (0.97-2.27) | 1.37 (0.97-2.13) | 1.37 (1.03-1.85) | —                 |
| A1 vs A3   | 1.38 (0.97-1.91) | 1.36 (0.95-1.86) | 1.38 (0.98-1.90) | 1.37 (0.96-1.88) | 1.37 (0.97-1.87) | 1.46 (1.02-2.02) | 1.38 (0.96-1.92) | —                | 1.58 (1.20-2.08)  |
| A1 vs A4   | 1.61 (1.01-2.46) | 1.53 (0.94-2.32) | 1.62 (1.01-2.47) | 1.61 (1.00-2.45) | 1.54 (0.96-2.32) | 1.62 (0.99-2.46) | 1.62 (0.96-2.57) | 1.61 (1.03-2.44) | —                 |
| A1 vs AD1  | 1.15 (0.83-1.69) | 1.18 (0.85-1.72) | 1.15 (0.83-1.67) | 1.18 (0.85-1.72) | 1.16 (0.84-1.67) | 1.06 (0.75-1.56) | 1.15 (0.82-1.69) | 1.15 (0.85-1.59) | 1.07 (0.84-1.37)  |
| A1 vs AD2  | 1.49 (0.73-2.77) | 1.43 (0.69-2.65) | 1.51 (0.73-2.81) | 1.50 (0.72-2.79) | 1.44 (0.70-2.64) | 1.35 (0.74-2.78) | —                | 1.50 (0.74-2.74) | —                 |
| A1 vs TC   | 1.19 (0.73-1.96) | 1.15 (0.70-1.92) | 1.19 (0.73-2.00) | 1.19 (0.72-1.96) | 1.16 (0.71-1.92) | 1.33 (0.81-2.33) | 1.18 (0.70-2.00) | 1.20 (0.75-1.96) | —                 |
| A1 vs A+TC | 1.03 (0.34-4.76) | —                | 1.04 (0.34-5.00) | —                | —                | —                | 1.02 (0.34-4.76) | 1.03 (0.34-5.26) | —                 |
| A1 vs C    | 1.04 (0.70-1.69) | 1.04 (0.71-1.67) | 1.04 (0.71-1.67) | 1.04 (0.71-1.69) | 1.04 (0.71-1.67) | 0.96 (0.59-1.69) | 1.04 (0.70-1.72) | 1.04 (0.72-1.59) | —                 |
| A1 vs A+C  | 3.03 (2.08-4.76) | 2.94 (2.04-4.55) | 3.03 (2.13-4.76) | 2.94 (2.04-4.55) | 3.03 (2.13-4.55) | 2.86 (1.85-4.55) | 3.03 (2.08-4.76) | 2.94 (2.13-4.55) | —                 |
| A1 vs TF   | 0.68 (0.41-1.11) | 0.71 (0.43-1.18) | 0.73 (0.44-1.20) | 0.72 (0.43-1.19) | 0.72 (0.44-1.19) | 0.78 (0.45-1.27) | 0.68 (0.40-1.12) | 0.70 (0.44-1.09) | —                 |
| A1 vs CL   | 0.69 (0.45-1.12) | 0.68 (0.44-1.10) | 0.69 (0.46-1.12) | 0.67 (0.44-1.10) | 0.69 (0.46-1.11) | 0.57 (0.34-1.08) | 0.69 (0.45-1.14) | 0.69 (0.46-1.09) | —                 |
| A1 vs A+CL | 0.87 (0.23-5.26) | 0.83 (0.22-5.26) | 0.93 (0.26-5.56) | 0.83 (0.21-5.88) | 0.87 (0.23-5.56) | —                | 0.94 (0.26-5.88) | 0.92 (0.27-5.56) | —                 |
| A2 vs A3   | 0.99 (0.68-1.35) | 1.01 (0.69-1.39) | 0.99 (0.69-1.35) | 1.02 (0.70-1.40) | 0.98 (0.68-1.33) | 1.00 (0.64-1.43) | 0.99 (0.67-1.36) | —                | —                 |
| A2 vs A4   | 1.15 (0.72-1.71) | 1.13 (0.70-1.70) | 1.16 (0.73-1.73) | 1.20 (0.75-1.79) | 1.10 (0.68-1.61) | 1.10 (0.65-1.68) | 1.15 (0.69-1.78) | 1.16 (0.80-1.65) | —                 |
| A2 vs AD1  | 0.84 (0.64-1.08) | 0.90 (0.66-1.19) | 0.84 (0.64-1.07) | 0.90 (0.66-1.20) | 0.84 (0.64-1.07) | 0.75 (0.50-1.07) | 0.84 (0.63-1.08) | 0.85 (0.66-1.06) | 0.85 (0.56-1.28)* |
| A2 vs AD2  | 1.06 (0.52-1.93) | 1.06 (0.52-1.93) | 1.08 (0.53-1.98) | 1.12 (0.54-2.05) | 1.03 (0.50-1.84) | 1.03 (0.49-1.88) | —                | 1.09 (0.56-1.90) | —                 |
| A2 vs TC   | 0.90 (0.52-1.38) | 0.91 (0.52-1.41) | 0.91 (0.53-1.40) | 0.95 (0.54-1.46) | 0.88 (0.51-1.34) | 0.98 (0.54-1.57) | 0.90 (0.51-1.40) | 0.92 (0.57-1.34) | —                 |
| A2 vs A+TC | 1.15 (0.25-3.37) | —                | 1.19 (0.25-3.57) | —                | —                | —                | 1.13 (0.24-3.33) | 1.19 (0.25-3.68) | —                 |

**Supplementary appendix 8. Main analysis, sensitivity analysis, and direct comparison for any bleeding.**

|            |                  |                  |                  |                  |                  |                  |                  |                  |                  |
|------------|------------------|------------------|------------------|------------------|------------------|------------------|------------------|------------------|------------------|
| A2 vs C    | 0.78 (0.54-1.09) | 0.81 (0.56-1.14) | 0.77 (0.54-1.08) | 0.81 (0.56-1.15) | 0.77 (0.54-1.07) | 0.70 (0.40-1.14) | 0.78 (0.53-1.10) | 0.78 (0.57-1.06) | —                |
| A2 vs A+C  | 2.21 (1.71-2.87) | 2.23 (1.74-2.92) | 2.21 (1.72-2.88) | 2.24 (1.74-2.94) | 2.20 (1.72-2.84) | 2.01 (1.41-2.69) | 2.21 (1.70-2.91) | 2.22 (1.78-2.83) | 2.46 (1.93-3.12) |
| A2 vs TF   | 0.52 (0.29-0.80) | 0.57 (0.31-0.88) | 0.56 (0.31-0.86) | 0.58 (0.32-0.88) | 0.55 (0.31-0.85) | 0.57 (0.29-0.90) | 0.52 (0.28-0.80) | 0.53 (0.35-0.71) | —                |
| A2 vs CL   | 0.51 (0.35-0.72) | 0.52 (0.36-0.73) | 0.52 (0.36-0.72) | 0.52 (0.36-0.73) | 0.51 (0.35-0.71) | 0.42 (0.25-0.66) | 0.52 (0.35-0.72) | 0.52 (0.37-0.71) | 0.42 (0.29-0.62) |
| A2 vs A+CL | 1.16 (0.17-3.68) | 1.19 (0.17-3.90) | 1.22 (0.19-3.81) | 1.23 (0.16-4.16) | 1.19 (0.16-3.78) | —                | 1.22 (0.19-3.89) | 1.21 (0.20-3.93) | 3.12 (0.13-77.5) |
| A3 vs A4   | 1.17 (0.78-1.71) | 1.13 (0.75-1.64) | 1.18 (0.79-1.72) | 1.19 (0.79-1.72) | 1.13 (0.75-1.63) | 1.12 (0.73-1.62) | 1.18 (0.76-1.76) | —                | 1.30 (0.90-1.88) |
| A3 vs AD1  | 0.85 (0.61-1.23) | 0.88 (0.64-1.30) | 0.85 (0.61-1.23) | 0.87 (0.63-1.30) | 0.85 (0.62-1.23) | 0.73 (0.50-1.15) | 0.85 (0.60-1.25) | —                | —                |
| A3 vs AD2  | 1.09 (0.56-1.98) | 1.06 (0.54-1.92) | 1.10 (0.56-1.99) | 1.11 (0.56-2.01) | 1.06 (0.54-1.89) | 0.93 (0.53-1.89) | —                | —                | —                |
| A3 vs TC   | 0.88 (0.56-1.39) | 0.86 (0.55-1.37) | 0.88 (0.56-1.41) | 0.88 (0.56-1.41) | 0.86 (0.55-1.35) | 0.93 (0.59-1.56) | 0.87 (0.55-1.41) | —                | —                |
| A3 vs A+TC | 0.76 (0.26-3.45) | —                | 0.77 (0.25-3.57) | —                | —                | —                | 0.75 (0.25-3.45) | —                | —                |
| A3 vs C    | 0.77 (0.53-1.22) | 0.78 (0.54-1.23) | 0.76 (0.53-1.20) | 0.78 (0.54-1.23) | 0.78 (0.53-1.20) | 0.67 (0.40-1.22) | 0.77 (0.52-1.23) | —                | —                |
| A3 vs A+C  | 2.22 (1.64-3.23) | 2.17 (1.61-3.23) | 2.22 (1.64-3.23) | 2.17 (1.61-3.23) | 2.22 (1.64-3.23) | 2.00 (1.41-2.94) | 2.22 (1.61-3.33) | —                | 1.92 (1.38-2.68) |
| A3 vs TF   | 0.51 (0.34-0.71) | 0.54 (0.37-0.78) | 0.54 (0.37-0.78) | 0.54 (0.37-0.78) | 0.54 (0.37-0.78) | 0.55 (0.36-0.78) | 0.51 (0.34-0.72) | —                | 0.46 (0.28-0.75) |
| A3 vs CL   | 0.51 (0.35-0.78) | 0.51 (0.35-0.78) | 0.51 (0.35-0.78) | 0.50 (0.35-0.78) | 0.51 (0.36-0.78) | 0.40 (0.24-0.74) | 0.51 (0.35-0.79) | —                | 0.80 (0.45-1.40) |
| A3 vs A+CL | 0.64 (0.17-3.85) | 0.63 (0.17-4.00) | 0.68 (0.19-4.00) | 0.62 (0.16-4.17) | 0.65 (0.17-4.00) | —                | 0.69 (0.19-4.17) | —                | —                |
| A4 vs AD1  | 0.73 (0.49-1.16) | 0.78 (0.52-1.28) | 0.72 (0.48-1.14) | 0.74 (0.50-1.20) | 0.76 (0.52-1.22) | 0.66 (0.43-1.12) | 0.72 (0.47-1.20) | 0.72 (0.49-1.09) | —                |
| A4 vs AD2  | 0.93 (0.54-1.51) | 0.94 (0.55-1.52) | 0.93 (0.54-1.51) | 0.94 (0.54-1.52) | 0.94 (0.54-1.53) | 0.87 (0.54-1.52) | —                | 0.93 (0.55-1.50) | 0.86 (0.55-1.36) |
| A4 vs TC   | 0.78 (0.54-1.06) | 0.79 (0.56-1.08) | 0.77 (0.55-1.05) | 0.78 (0.55-1.05) | 0.79 (0.56-1.09) | 0.87 (0.62-1.25) | 0.76 (0.53-1.06) | 0.78 (0.56-1.04) | 0.78 (0.49-1.24) |
| A4 vs A+TC | 0.67 (0.23-2.86) | —                | 0.67 (0.23-2.94) | —                | —                | —                | 0.66 (0.23-2.78) | 0.67 (0.23-3.13) | —                |
| A4 vs C    | 0.66 (0.43-1.12) | 0.70 (0.45-1.19) | 0.65 (0.42-1.11) | 0.66 (0.43-1.12) | 0.69 (0.45-1.18) | 0.60 (0.35-1.18) | 0.66 (0.41-1.16) | 0.65 (0.43-1.05) | —                |
| A4 vs A+C  | 1.92 (1.27-3.13) | 1.96 (1.30-3.23) | 1.89 (1.25-3.13) | 1.85 (1.22-3.03) | 2.00 (1.33-3.33) | 1.79 (1.15-3.13) | 1.89 (1.22-3.23) | 1.89 (1.28-2.94) | —                |
| A4 vs TF   | 0.44 (0.25-0.75) | 0.48 (0.28-0.83) | 0.46 (0.27-0.79) | 0.46 (0.27-0.79) | 0.48 (0.29-0.84) | 0.49 (0.28-0.85) | 0.43 (0.24-0.75) | 0.44 (0.27-0.73) | —                |
| A4 vs CL   | 0.44 (0.28-0.74) | 0.45 (0.28-0.78) | 0.44 (0.28-0.74) | 0.43 (0.27-0.74) | 0.46 (0.29-0.78) | 0.36 (0.21-0.70) | 0.44 (0.27-0.77) | 0.43 (0.28-0.71) | —                |
| A4 vs A+CL | 0.55 (0.15-3.45) | 0.56 (0.15-3.70) | 0.58 (0.16-3.70) | 0.53 (0.13-3.70) | 0.57 (0.15-3.70) | —                | 0.60 (0.17-3.70) | 0.58 (0.17-3.57) | —                |
| AD1 vs AD2 | 1.27 (0.63-2.33) | 1.20 (0.58-2.19) | 1.29 (0.63-2.37) | 1.26 (0.61-2.31) | 1.23 (0.60-2.22) | 1.40 (0.67-2.62) | —                | 1.29 (0.65-2.31) | -                |

**Supplementary appendix 8. Main analysis, sensitivity analysis, and direct comparison for any bleeding.**

|              |                  |                  |                  |                  |                  |                  |                  |                  |                  |
|--------------|------------------|------------------|------------------|------------------|------------------|------------------|------------------|------------------|------------------|
| AD1 vs TC    | 1.08 (0.63-1.65) | 1.02 (0.59-1.58) | 1.09 (0.64-1.66) | 1.06 (0.61-1.63) | 1.05 (0.61-1.60) | 1.34 (0.74-2.17) | 1.07 (0.61-1.67) | 1.09 (0.67-1.63) | —                |
| AD1 vs A+TC  | 1.38 (0.30-4.04) | —                | 1.42 (0.29-4.28) | —                | —                | —                | 1.35 (0.29-3.95) | 1.42 (0.29-4.40) | —                |
| AD1 vs C     | 0.92 (0.68-1.27) | 0.90 (0.66-1.23) | 0.92 (0.68-1.26) | 0.91 (0.66-1.24) | 0.92 (0.68-1.25) | 0.94 (0.64-1.34) | 0.92 (0.67-1.29) | 0.92 (0.69-1.24) | 0.92 (0.81-1.05) |
| AD1 vs A+C   | 2.65 (1.95-3.68) | 2.53 (1.82-3.53) | 2.65 (1.96-3.65) | 2.53 (1.83-3.56) | 2.64 (1.96-3.63) | 2.79 (1.72-4.22) | 2.66 (1.94-3.74) | 2.64 (1.98-3.62) | —                |
| AD1 vs TF    | 0.63 (0.34-0.96) | 0.64 (0.35-1.00) | 0.67 (0.37-1.04) | 0.65 (0.35-1.01) | 0.66 (0.37-1.02) | 0.78 (0.40-1.24) | 0.62 (0.33-0.97) | 0.64 (0.39-0.91) | —                |
| AD1 vs CL    | 0.62 (0.40-0.91) | 0.59 (0.38-0.88) | 0.62 (0.41-0.91) | 0.59 (0.38-0.88) | 0.62 (0.40-0.90) | 0.58 (0.32-0.98) | 0.62 (0.40-0.92) | 0.62 (0.41-0.90) | —                |
| AD1 vs A+CL  | 1.39 (0.20-4.42) | 1.35 (0.19-4.42) | 1.46 (0.23-4.60) | 1.40 (0.18-4.79) | 1.43 (0.20-4.61) | —                | 1.47 (0.23-4.78) | 1.45 (0.23-4.68) | —                |
| AD2 vs TC    | 0.83 (0.46-1.56) | 0.83 (0.47-1.59) | 0.83 (0.46-1.56) | 0.83 (0.46-1.56) | 0.83 (0.47-1.59) | 1.02 (0.52-1.79) | —                | 0.83 (0.47-1.54) | —                |
| AD2 vs A+TC  | 0.72 (0.23-3.57) | —                | 0.72 (0.23-3.70) | —                | —                | —                | —                | 0.71 (0.23-3.70) | —                |
| AD2 vs C     | 0.71 (0.38-1.52) | 0.75 (0.40-1.59) | 0.70 (0.38-1.49) | 0.71 (0.38-1.52) | 0.74 (0.40-1.56) | 0.65 (0.32-1.49) | —                | 0.70 (0.38-1.45) | —                |
| AD2 vs A+C   | 2.04 (1.12-4.35) | 2.08 (1.14-4.35) | 2.04 (1.11-4.17) | 1.96 (1.08-4.17) | 2.13 (1.18-4.55) | 1.92 (1.02-4.00) | —                | 2.00 (1.12-4.00) | —                |
| AD2 vs TF    | 0.47 (0.23-1.01) | 0.51 (0.26-1.12) | 0.49 (0.24-1.09) | 0.49 (0.24-1.08) | 0.51 (0.26-1.11) | 0.61 (0.26-1.14) | —                | 0.47 (0.24-1.00) | —                |
| AD2 vs CL    | 0.47 (0.25-1.01) | 0.48 (0.25-1.04) | 0.47 (0.25-0.99) | 0.46 (0.24-0.99) | 0.49 (0.26-1.04) | 0.39 (0.20-0.92) | —                | 0.47 (0.25-0.96) | —                |
| AD2 vs A+CL  | 0.60 (0.15-4.17) | 0.59 (0.15-4.55) | 0.63 (0.17-4.35) | 0.56 (0.13-4.55) | 0.61 (0.15-4.55) | —                | —                | 0.62 (0.17-4.35) | —                |
| TC vs A+TC   | 1.28 (0.31-3.59) | —                | 1.30 (0.31-3.68) | —                | —                | —                | 1.26 (0.31-3.49) | 1.29 (0.30-3.81) | 1.05 (0.33-3.33) |
| TC vs C      | 0.84 (0.54-1.52) | 0.87 (0.55-1.59) | 0.83 (0.53-1.52) | 0.84 (0.53-1.54) | 0.86 (0.55-1.56) | 0.68 (0.38-1.41) | 0.85 (0.53-1.56) | 0.83 (0.54-1.45) | 1.62 (0.53-4.99) |
| TC vs A+C    | 2.44 (1.56-4.35) | 2.44 (1.56-4.35) | 2.38 (1.54-4.35) | 2.33 (1.49-4.17) | 2.50 (1.61-4.35) | 2.04 (1.22-3.70) | 2.44 (1.56-4.55) | 2.38 (1.59-4.17) | —                |
| TC vs TF     | 0.60 (0.32-1.00) | 0.65 (0.35-1.12) | 0.64 (0.34-1.09) | 0.63 (0.34-1.08) | 0.65 (0.36-1.12) | 0.61 (0.30-1.03) | 0.60 (0.31-1.02) | 0.61 (0.34-0.99) | —                |
| TC vs CL     | 0.56 (0.34-1.01) | 0.56 (0.34-1.03) | 0.56 (0.34-1.01) | 0.54 (0.33-1.00) | 0.57 (0.35-1.04) | 0.41 (0.23-0.84) | 0.56 (0.34-1.05) | 0.55 (0.35-0.97) | —                |
| TC vs A+CL   | 0.70 (0.18-4.35) | 0.69 (0.18-4.76) | 0.74 (0.20-4.76) | 0.67 (0.17-4.76) | 0.72 (0.18-4.76) | —                | 0.76 (0.21-5.00) | 0.74 (0.21-4.76) | —                |
| A+TC vs C    | 0.66 (0.22-3.13) | —                | 0.64 (0.21-3.13) | —                | —                | —                | 0.67 (0.23-3.23) | 0.64 (0.21-3.13) | —                |
| A+TC vs A+C  | 1.89 (0.65-9.09) | —                | 1.85 (0.61-9.09) | —                | —                | —                | 1.92 (0.66-9.09) | 1.85 (0.58-9.09) | —                |
| A+TC vs TF   | 0.69 (0.14-2.08) | -                | 0.73 (0.15-2.25) | —                | —                | —                | 0.70 (0.14-2.11) | 0.71 (0.14-2.14) | -                |
| A+TC vs CL   | 0.43 (0.14-2.13) | —                | 0.43 (0.14-2.13) | —                | —                | —                | 0.44 (0.15-2.13) | 0.43 (0.14-2.13) | —                |
| A+TC vs A+CL | 0.56 (0.13-6.67) | —                | 0.56 (0.12-7.14) | —                | —                | —                | 0.61 (0.14-7.14) | 0.57 (0.13-7.69) | —                |

**Supplementary appendix 8. Main analysis, sensitivity analysis, and direct comparison for any bleeding.**

|             |                  |                  |                  |                  |                  |                  |                  |                  |                  |
|-------------|------------------|------------------|------------------|------------------|------------------|------------------|------------------|------------------|------------------|
| C vs A+C    | 2.90 (2.06-4.04) | 2.83 (2.01-3.96) | 2.91 (2.08-4.04) | 2.82 (2.00-3.95) | 2.91 (2.09-4.03) | 3.06 (1.63-5.19) | 2.92 (2.05-4.12) | 2.90 (2.10-4.00) | 3.28 (2.45-4.40) |
| C vs TF     | 0.69 (0.35-1.09) | 0.72 (0.37-1.15) | 0.73 (0.38-1.18) | 0.73 (0.37-1.16) | 0.73 (0.38-1.17) | 0.85 (0.38-1.49) | 0.69 (0.34-1.10) | 0.70 (0.40-1.04) | —                |
| C vs CL     | 0.68 (0.41-1.05) | 0.67 (0.41-1.02) | 0.69 (0.42-1.05) | 0.67 (0.40-1.02) | 0.68 (0.42-1.04) | 0.64 (0.31-1.17) | 0.68 (0.41-1.06) | 0.68 (0.42-1.03) | —                |
| C vs A+CL   | 1.53 (0.22-4.85) | 1.51 (0.21-4.92) | 1.61 (0.25-5.08) | 1.56 (0.20-5.33) | 1.57 (0.22-5.11) | —                | 1.61 (0.25-5.23) | 1.59 (0.25-5.13) | —                |
| A+C vs TF   | 0.24 (0.13-0.36) | 0.26 (0.14-0.40) | 0.25 (0.14-0.39) | 0.26 (0.14-0.40) | 0.25 (0.14-0.39) | 0.29 (0.15-0.45) | 0.24 (0.12-0.37) | 0.24 (0.15-0.34) | —                |
| A+C vs CL   | 0.23 (0.15-0.34) | 0.23 (0.15-0.34) | 0.23 (0.15-0.34) | 0.23 (0.15-0.35) | 0.23 (0.15-0.34) | 0.20 (0.12-0.36) | 0.23 (0.15-0.35) | 0.23 (0.15-0.34) | —                |
| A+C vs A+CL | 0.53 (0.08-1.66) | 0.53 (0.08-1.71) | 0.55 (0.09-1.71) | 0.55 (0.07-1.81) | 0.54 (0.08-1.71) | —                | 0.55 (0.09-1.74) | 0.55 (0.09-1.75) | 0.32 (0.06-1.59) |
| TF vs CL    | 0.96 (0.60-1.82) | 0.90 (0.56-1.67) | 0.91 (0.56-1.67) | 0.89 (0.55-1.67) | 0.91 (0.57-1.69) | 0.70 (0.39-1.56) | 0.97 (0.60-1.89) | 0.94 (0.62-1.64) | —                |
| TF vs A+CL  | 1.20 (0.31-7.69) | 1.11 (0.29-7.69) | 1.20 (0.33-7.69) | 1.10 (0.27-8.33) | 1.15 (0.30-7.69) | —                | 1.32 (0.37-8.33) | 1.27 (0.37-7.69) | —                |
| CL vs A+CL  | 2.32 (0.33-7.50) | 2.35 (0.32-7.86) | 2.43 (0.36-7.81) | 2.43 (0.30-8.43) | 2.38 (0.31-7.79) | 2.44 (0.37-8.14) | 2.39 (0.37-7.93) | —                | —                |

Random effects model was used; A, aspirin; D, dipyridamole; P, placebo; TF, triflusal; TC, ticlopidine; CL, cilostazol; C, clopidogrel; A1, aspirin 30-50 mg daily; A2, aspirin 75-162 mg daily; A3, aspirin 283-330 mg daily; A4, aspirin 500-1500 mg daily; AD1, aspirin 50 mg plus dipyridamole 400 mg daily; AD2, aspirin 990-1300 mg plus dipyridamole 150-300 mg daily; for all of the table cells, odds ratios <1 favor the right regimens; for network meta-analysis, “—” indicates that the corresponding regimens were excluded by sensitivity analysis; for direct comparison, “—” indicates that no direct comparison is available; statistical heterogeneity was found (P-for-heterogeneity < 0.1 or I<sup>2</sup> >50%).
