# Supplementary material for: Antiplatelet regimens in the long-term secondary prevention of transient ischaemic attack and ischaemic stroke: an updated network meta-analysis
Source: PubMed Central journal article supplement — BMJ Open. 2016 Mar 17;6(3):e009013. doi: 10.1136/bmjopen-2015-009013 (PMC4800132; doi:10.1136/bmjopen-2015-009013), 2016-03-17
Supplement: bmjopen-2015-009013supp_appendix9.pdf [file bmjopen-2015-009013supp_appendix9.pdf]

**Supplementary appendix 9. Sensitivity to the choice of prior distribution.**

**Sensitivity to the choice of prior distribution.**

| Comparisons | Serious vascular events |                  |                  | Recurrent stroke |                  |                  | Any bleeding     |                  |                  |
|-------------|-------------------------|------------------|------------------|------------------|------------------|------------------|------------------|------------------|------------------|
|             | Main analysis           | Prior 1          | Prior 2          | Main analysis    | Prior 1          | Prior 2          | Main analysis    | Prior 1          | Prior 2          |
| P vs D      | 0.88 (0.75-1.06)        | 0.88 (0.75-1.06) | 0.88 (0.72-1.10) | 0.87 (0.66-1.21) | 0.87 (0.65-1.22) | 0.88 (0.63-1.28) | 0.97 (0.65-1.54) | 0.98 (0.65-1.54) | 0.97 (0.60-1.67) |
| P vs A1     | 0.86 (0.74-1.00)        | 0.86 (0.73-1.00) | 0.86 (0.72-1.03) | 0.87 (0.64-1.18) | 0.87 (0.64-1.19) | 0.88 (0.61-1.26) | 1.72 (1.18-2.40) | 1.72 (1.18-2.41) | 1.73 (1.11-2.56) |
| P vs A2     | 0.83 (0.71-0.96)        | 0.83 (0.71-0.96) | 0.83 (0.70-0.98) | 0.78 (0.63-0.99) | 0.78 (0.63-0.99) | 0.78 (0.61-1.02) | 2.33 (1.73-3.30) | 2.33 (1.72-3.33) | 2.33 (1.67-3.45) |
| P vs A3     | 0.84 (0.73-0.97)        | 0.84 (0.73-0.97) | 0.84 (0.72-0.99) | 0.80 (0.61-1.04) | 0.80 (0.60-1.05) | 0.80 (0.59-1.08) | 2.33 (1.65-3.19) | 2.34 (1.64-3.19) | 2.34 (1.57-3.33) |
| P vs A4     | 0.82 (0.72-0.93)        | 0.82 (0.73-0.93) | 0.82 (0.72-0.94) | 0.82 (0.68-0.99) | 0.82 (0.68-0.99) | 0.83 (0.67-1.01) | 2.69 (1.86-3.81) | 2.71 (1.84-3.81) | 2.71 (1.79-3.95) |
| P vs AD1    | 0.72 (0.63-0.83)        | 0.72 (0.63-0.83) | 0.72 (0.61-0.85) | 0.69 (0.56-0.89) | 0.69 (0.56-0.9)  | 0.70 (0.54-0.93) | 1.95 (1.43-2.78) | 1.96 (1.43-2.78) | 1.96 (1.37-2.86) |
| P vs AD2    | 0.70 (0.59-0.83)        | 0.70 (0.59-0.83) | 0.71 (0.59-0.85) | 0.63 (0.48-0.81) | 0.63 (0.48-0.81) | 0.63 (0.47-0.84) | 2.49 (1.31-4.41) | 2.51 (1.29-4.41) | 2.56 (1.26-4.73) |
| P vs TC     | 0.80 (0.68-0.93)        | 0.80 (0.69-0.93) | 0.80 (0.67-0.95) | 0.79 (0.62-0.99) | 0.79 (0.62-1.00) | 0.79 (0.61-1.03) | 2.12 (1.35-3.09) | 2.13 (1.34-3.10) | 2.07 (1.25-3.12) |
| P vs A+TC   | 0.94 (0.32-2.17)        | 0.96 (0.36-2.20) | 0.93 (0.32-2.15) | 0.74 (0.20-1.99) | 0.71 (0.21-1.85) | 0.74 (0.21-1.87) | 2.71 (0.60-7.83) | 2.71 (0.61-8.05) | 2.66 (0.55-7.93) |
| P vs C      | 0.74 (0.65-0.86)        | 0.74 (0.64-0.86) | 0.75 (0.63-0.89) | 0.68 (0.53-0.92) | 0.68 (0.53-0.93) | 0.69 (0.52-0.97) | 1.79 (1.23-2.78) | 1.75 (1.22-2.70) | 1.79 (1.16-3.03) |
| P vs A+C    | 0.70 (0.59-0.83)        | 0.69 (0.59-0.83) | 0.69 (0.58-0.85) | 0.65 (0.50-0.86) | 0.65 (0.50-0.86) | 0.65 (0.48-0.89) | 5.00 (3.70-7.69) | 5.00 (3.70-7.69) | 5.26 (3.57-8.33) |
| P vs TF     | 0.82 (0.63-1.04)        | 0.82 (0.63-1.04) | 0.81 (0.61-1.06) | 0.72 (0.48-1.05) | 0.72 (0.47-1.06) | 0.72 (0.45-1.10) | 1.24 (0.69-1.90) | 1.24 (0.69-1.88) | 1.20 (0.62-1.94) |
| P vs CL     | 0.57 (0.45-0.72)        | 0.57 (0.45-0.72) | 0.56 (0.44-0.73) | 0.51 (0.38-0.70) | 0.50 (0.37-0.69) | 0.50 (0.36-0.71) | 1.18 (0.80-1.79) | 1.18 (0.80-1.79) | 1.18 (0.78-1.89) |
| P vs A+CL   | 0.94 (0.47-2.22)        | 0.93 (0.46-2.27) | 0.97 (0.47-2.38) | 0.90 (0.39-2.69) | 0.88 (0.38-2.56) | 0.88 (0.37-2.78) | 1.47 (0.39-9.09) | 1.41 (0.36-9.09) | 1.56 (0.41-11.1) |
| D vs A1     | 0.97 (0.80-1.16)        | 0.97 (0.80-1.16) | 0.97 (0.78-1.20) | 0.99 (0.71-1.35) | 0.99 (0.70-1.36) | 1.00 (0.66-1.44) | 1.73 (1.09-2.60) | 1.73 (1.09-2.60) | 1.75 (1.02-2.80) |
| D vs A2     | 0.93 (0.76-1.15)        | 0.93 (0.76-1.15) | 0.93 (0.73-1.19) | 0.88 (0.63-1.25) | 0.88 (0.63-1.25) | 0.87 (0.59-1.32) | 2.33 (1.52-3.85) | 2.33 (1.52-3.85) | 2.33 (1.41-4.17) |
| D vs A3     | 0.95 (0.78-1.15)        | 0.95 (0.78-1.15) | 0.95 (0.75-1.19) | 0.92 (0.60-1.31) | 0.92 (0.60-1.33) | 0.92 (0.56-1.40) | 2.37 (1.43-3.68) | 2.37 (1.43-3.67) | 2.39 (1.31-3.95) |
| D vs A4     | 0.93 (0.75-1.15)        | 0.93 (0.75-1.14) | 0.93 (0.72-1.17) | 0.95 (0.65-1.31) | 0.95 (0.65-1.32) | 0.94 (0.61-1.38) | 2.75 (1.56-4.51) | 2.76 (1.56-4.53) | 2.78 (1.44-4.87) |
| D vs AD1    | 0.81 (0.68-0.97)        | 0.81 (0.68-0.97) | 0.81 (0.65-1.00) | 0.78 (0.58-1.08) | 0.78 (0.58-1.09) | 0.78 (0.56-1.15) | 1.92 (1.30-3.03) | 1.92 (1.30-3.03) | 1.92 (1.20-3.23) |
| D vs AD2    | 0.80 (0.62-1.01)        | 0.79 (0.62-1.01) | 0.80 (0.60-1.04) | 0.72 (0.47-1.04) | 0.72 (0.47-1.05) | 0.72 (0.44-1.11) | 2.55 (1.17-4.97) | 2.56 (1.15-5.00) | 2.64 (1.08-5.49) |
| D vs TC     | 0.90 (0.71-1.13)        | 0.91 (0.72-1.13) | 0.90 (0.69-1.16) | 0.90 (0.61-1.28) | 0.90 (0.60-1.29) | 0.91 (0.57-1.36) | 2.17 (1.15-3.58) | 2.17 (1.13-3.61) | 2.13 (1.02-3.76) |
| D vs A+TC   | 1.06 (0.35-2.44)        | 1.09 (0.40-2.54) | 1.05 (0.36-2.47) | 0.84 (0.22-2.32) | 0.82 (0.23-2.18) | 0.84 (0.22-2.20) | 2.77 (0.57-8.34) | 2.77 (0.57-8.57) | 2.73 (0.50-8.52) |

**Supplementary appendix 9. Sensitivity to the choice of prior distribution.**

|            |                  |                  |                  |                  |                  |                  |                  |                  |                  |
|------------|------------------|------------------|------------------|------------------|------------------|------------------|------------------|------------------|------------------|
| D vs C     | 0.84 (0.69-1.02) | 0.84 (0.69-1.02) | 0.84 (0.67-1.07) | 0.80 (0.55-1.13) | 0.80 (0.55-1.14) | 0.81 (0.52-1.22) | 1.87 (1.12-3.06) | 1.86 (1.10-3.05) | 1.91 (1.02-3.38) |
| D vs A+C   | 0.79 (0.63-0.98) | 0.79 (0.64-0.98) | 0.79 (0.61-1.01) | 0.76 (0.51-1.07) | 0.76 (0.51-1.08) | 0.76 (0.47-1.14) | 5.34 (3.26-8.63) | 5.33 (3.25-8.68) | 5.50 (3.03-9.54) |
| D vs TF    | 0.93 (0.69-1.22) | 0.92 (0.68-1.22) | 0.92 (0.65-1.24) | 0.83 (0.49-1.29) | 0.83 (0.48-1.30) | 0.83 (0.45-1.37) | 1.26 (0.62-2.09) | 1.25 (0.62-2.07) | 1.22 (0.54-2.19) |
| D vs CL    | 0.65 (0.48-0.86) | 0.65 (0.48-0.86) | 0.65 (0.47-0.87) | 0.60 (0.38-0.87) | 0.59 (0.38-0.88) | 0.59 (0.35-0.91) | 1.24 (0.71-2.05) | 1.24 (0.70-2.06) | 1.26 (0.66-2.21) |
| D vs A+CL  | 1.26 (0.52-2.50) | 1.24 (0.51-2.60) | 1.30 (0.52-2.68) | 1.31 (0.43-3.15) | 1.28 (0.42-3.03) | 1.31 (0.40-3.27) | 2.81 (0.38-9.20) | 2.89 (0.35-9.45) | 3.19 (0.40-11.5) |
| A1 vs A2   | 0.96 (0.81-1.16) | 0.96 (0.80-1.16) | 0.96 (0.78-1.19) | 0.90 (0.64-1.27) | 0.90 (0.64-1.28) | 0.88 (0.60-1.35) | 1.37 (0.97-2.08) | 1.37 (0.97-2.08) | 1.37 (0.91-2.22) |
| A1 vs A3   | 0.98 (0.85-1.14) | 0.99 (0.85-1.15) | 0.99 (0.82-1.17) | 0.94 (0.62-1.34) | 0.94 (0.62-1.37) | 0.94 (0.58-1.43) | 1.38 (0.97-1.91) | 1.38 (0.97-1.91) | 1.39 (0.91-2.01) |
| A1 vs A4   | 0.96 (0.79-1.16) | 0.97 (0.80-1.16) | 0.96 (0.77-1.18) | 0.97 (0.67-1.34) | 0.97 (0.66-1.34) | 0.97 (0.63-1.41) | 1.61 (1.01-2.46) | 1.62 (1.00-2.49) | 1.62 (0.93-2.65) |
| A1 vs AD1  | 0.84 (0.72-0.98) | 0.84 (0.71-0.99) | 0.84 (0.69-1.01) | 0.80 (0.60-1.10) | 0.80 (0.59-1.11) | 0.79 (0.56-1.18) | 1.15 (0.83-1.69) | 1.15 (0.83-1.67) | 1.15 (0.78-1.79) |
| A1 vs AD2  | 0.82 (0.66-1.02) | 0.82 (0.65-1.03) | 0.83 (0.64-1.06) | 0.74 (0.48-1.06) | 0.74 (0.48-1.08) | 0.74 (0.45-1.14) | 1.49 (0.73-2.77) | 1.50 (0.72-2.8)  | 1.54 (0.69-3.06) |
| A1 vs TC   | 0.93 (0.76-1.15) | 0.93 (0.76-1.15) | 0.92 (0.73-1.18) | 0.89 (0.62-1.32) | 0.89 (0.62-1.32) | 0.88 (0.58-1.39) | 1.19 (0.73-1.96) | 1.19 (0.72-2.00) | 1.15 (0.65-2.08) |
| A1 vs A+TC | 0.86 (0.37-2.56) | 0.90 (0.41-2.56) | 0.86 (0.37-2.56) | 0.61 (0.22-2.38) | 0.61 (0.23-2.22) | 0.61 (0.22-2.22) | 1.03 (0.34-4.76) | 1.02 (0.34-5.00) | 0.97 (0.30-5.00) |
| A1 vs C    | 0.86 (0.74-1.03) | 0.86 (0.74-1.03) | 0.87 (0.71-1.06) | 0.79 (0.56-1.15) | 0.79 (0.56-1.18) | 0.79 (0.53-1.25) | 1.04 (0.70-1.69) | 1.04 (0.70-1.69) | 1.04 (0.66-1.85) |
| A1 vs A+C  | 0.81 (0.68-0.98) | 0.81 (0.68-0.99) | 0.81 (0.65-1.01) | 0.75 (0.52-1.09) | 0.75 (0.52-1.1)  | 0.74 (0.49-1.16) | 3.03 (2.08-4.76) | 3.03 (2.08-4.76) | 3.03 (2.00-5.26) |
| A1 vs TF   | 0.94 (0.73-1.23) | 0.94 (0.72-1.22) | 0.93 (0.70-1.25) | 0.80 (0.50-1.32) | 0.80 (0.50-1.33) | 0.78 (0.46-1.41) | 0.68 (0.41-1.11) | 0.68 (0.40-1.11) | 0.65 (0.36-1.15) |
| A1 vs CL   | 0.66 (0.51-0.87) | 0.66 (0.51-0.88) | 0.65 (0.49-0.88) | 0.58 (0.39-0.88) | 0.58 (0.38-0.89) | 0.57 (0.36-0.93) | 0.69 (0.45-1.12) | 0.69 (0.45-1.12) | 0.69 (0.43-1.20) |
| A1 vs A+CL | 1.10 (0.54-2.56) | 1.09 (0.53-2.63) | 1.14 (0.55-2.78) | 1.03 (0.44-3.23) | 1.01 (0.43-3.13) | 1.00 (0.40-3.33) | 0.87 (0.23-5.26) | 0.83 (0.21-5.56) | 0.93 (0.24-6.67) |
| A2 vs A3   | 1.02 (0.87-1.19) | 1.02 (0.87-1.19) | 1.02 (0.84-1.22) | 1.02 (0.75-1.37) | 1.02 (0.75-1.37) | 1.02 (0.72-1.42) | 0.99 (0.68-1.35) | 0.99 (0.68-1.35) | 0.98 (0.64-1.40) |
| A2 vs A4   | 0.99 (0.82-1.18) | 1.00 (0.83-1.19) | 0.99 (0.80-1.21) | 1.05 (0.79-1.39) | 1.05 (0.79-1.38) | 1.06 (0.76-1.43) | 1.15 (0.72-1.71) | 1.15 (0.72-1.72) | 1.15 (0.68-1.80) |
| A2 vs AD1  | 0.87 (0.76-1.00) | 0.87 (0.76-1.00) | 0.87 (0.74-1.03) | 0.89 (0.72-1.12) | 0.89 (0.72-1.12) | 0.90 (0.70-1.17) | 0.84 (0.64-1.08) | 0.84 (0.64-1.08) | 0.84 (0.61-1.13) |
| A2 vs AD2  | 0.85 (0.67-1.05) | 0.85 (0.68-1.06) | 0.85 (0.66-1.09) | 0.81 (0.56-1.12) | 0.80 (0.56-1.12) | 0.81 (0.54-1.17) | 1.06 (0.52-1.93) | 1.07 (0.52-1.94) | 1.09 (0.49-2.10) |
| A2 vs TC   | 0.97 (0.78-1.18) | 0.97 (0.79-1.18) | 0.97 (0.76-1.21) | 1.01 (0.73-1.36) | 1.01 (0.73-1.36) | 1.02 (0.71-1.41) | 0.90 (0.52-1.38) | 0.91 (0.52-1.40) | 0.88 (0.48-1.41) |
| A2 vs A+TC | 1.13 (0.38-2.62) | 1.16 (0.43-2.67) | 1.13 (0.39-2.63) | 0.94 (0.25-2.63) | 0.91 (0.26-2.38) | 0.94 (0.26-2.41) | 1.15 (0.25-3.37) | 1.16 (0.25-3.52) | 1.13 (0.22-3.43) |
| A2 vs C    | 0.90 (0.77-1.05) | 0.90 (0.77-1.05) | 0.90 (0.75-1.08) | 0.89 (0.68-1.17) | 0.89 (0.68-1.17) | 0.90 (0.66-1.23) | 0.78 (0.54-1.09) | 0.77 (0.54-1.09) | 0.78 (0.51-1.18) |
| A2 vs A+C  | 0.84 (0.72-0.98) | 0.85 (0.72-0.98) | 0.85 (0.71-1.01) | 0.84 (0.66-1.07) | 0.84 (0.66-1.07) | 0.84 (0.63-1.10) | 2.21 (1.71-2.87) | 2.21 (1.70-2.88) | 2.24 (1.64-3.06) |

### Supplementary appendix 9. Sensitivity to the choice of prior distribution.

|             |                  |                  |                  |                  |                  |                  |                  |                  |                  |
|-------------|------------------|------------------|------------------|------------------|------------------|------------------|------------------|------------------|------------------|
| A2 vs TF    | 0.99 (0.74-1.28) | 0.99 (0.74-1.28) | 0.98 (0.72-1.30) | 0.92 (0.59-1.36) | 0.92 (0.59-1.37) | 0.92 (0.56-1.43) | 0.52 (0.29-0.80) | 0.52 (0.28-0.80) | 0.50 (0.25-0.82) |
| A2 vs CL    | 0.69 (0.55-0.86) | 0.69 (0.55-0.86) | 0.69 (0.54-0.86) | 0.66 (0.49-0.86) | 0.66 (0.49-0.86) | 0.66 (0.47-0.88) | 0.51 (0.35-0.72) | 0.51 (0.35-0.72) | 0.52 (0.34-0.74) |
| A2 vs A+CL  | 1.34 (0.55-2.65) | 1.33 (0.56-2.73) | 1.39 (0.57-2.83) | 1.46 (0.50-3.38) | 1.42 (0.49-3.28) | 1.46 (0.47-3.52) | 1.16 (0.17-3.68) | 1.20 (0.15-3.80) | 1.30 (0.18-4.44) |
| A3 vs A4    | 0.98 (0.83-1.15) | 0.98 (0.83-1.16) | 0.98 (0.81-1.17) | 1.05 (0.78-1.38) | 1.05 (0.77-1.39) | 1.05 (0.75-1.43) | 1.17 (0.78-1.71) | 1.18 (0.78-1.73) | 1.19 (0.75-1.81) |
| A3 vs AD1   | 0.85 (0.75-0.98) | 0.85 (0.74-0.99) | 0.85 (0.72-1.01) | 0.87 (0.65-1.22) | 0.87 (0.65-1.22) | 0.87 (0.63-1.28) | 0.85 (0.61-1.23) | 0.85 (0.61-1.23) | 0.85 (0.58-1.32) |
| A3 vs AD2   | 0.84 (0.68-1.03) | 0.84 (0.67-1.03) | 0.84 (0.66-1.06) | 0.80 (0.55-1.13) | 0.80 (0.55-1.13) | 0.80 (0.52-1.19) | 1.09 (0.56-1.98) | 1.10 (0.55-1.98) | 1.12 (0.53-2.15) |
| A3 vs TC    | 0.94 (0.78-1.15) | 0.94 (0.79-1.15) | 0.94 (0.76-1.16) | 0.97 (0.71-1.37) | 0.97 (0.71-1.39) | 0.97 (0.68-1.43) | 0.88 (0.56-1.39) | 0.88 (0.56-1.41) | 0.85 (0.51-1.45) |
| A3 vs A+TC  | 0.88 (0.37-2.56) | 0.92 (0.42-2.63) | 0.88 (0.38-2.56) | 0.67 (0.25-2.56) | 0.67 (0.26-2.33) | 0.67 (0.25-2.44) | 0.76 (0.26-3.45) | 0.76 (0.26-3.57) | 0.72 (0.23-3.57) |
| A3 vs C     | 0.88 (0.78-1.01) | 0.88 (0.78-1.00) | 0.88 (0.76-1.03) | 0.86 (0.64-1.22) | 0.86 (0.64-1.22) | 0.86 (0.61-1.30) | 0.77 (0.53-1.22) | 0.77 (0.53-1.22) | 0.78 (0.50-1.33) |
| A3 vs A+C   | 0.83 (0.71-0.96) | 0.83 (0.71-0.96) | 0.83 (0.70-0.98) | 0.82 (0.63-1.09) | 0.82 (0.63-1.10) | 0.82 (0.60-1.14) | 2.22 (1.64-3.23) | 2.22 (1.64-3.23) | 2.27 (1.59-3.57) |
| A3 vs TF    | 0.96 (0.78-1.2)  | 0.96 (0.78-1.19) | 0.95 (0.76-1.19) | 0.88 (0.67-1.19) | 0.88 (0.66-1.19) | 0.88 (0.64-1.22) | 0.51 (0.34-0.71) | 0.51 (0.34-0.72) | 0.49 (0.31-0.73) |
| A3 vs CL    | 0.67 (0.53-0.87) | 0.68 (0.52-0.88) | 0.67 (0.51-0.88) | 0.64 (0.44-0.93) | 0.63 (0.44-0.93) | 0.63 (0.42-0.96) | 0.51 (0.35-0.78) | 0.51 (0.35-0.79) | 0.51 (0.34-0.82) |
| A3 vs A+CL  | 1.12 (0.56-2.56) | 1.11 (0.54-2.70) | 1.16 (0.56-2.78) | 1.14 (0.49-3.33) | 1.11 (0.49-3.33) | 1.11 (0.46-3.57) | 0.64 (0.17-3.85) | 0.62 (0.16-4.00) | 0.68 (0.18-4.76) |
| A4 vs AD1   | 0.88 (0.74-1.05) | 0.88 (0.73-1.04) | 0.88 (0.72-1.08) | 0.84 (0.65-1.14) | 0.84 (0.65-1.15) | 0.85 (0.63-1.19) | 0.73 (0.49-1.16) | 0.72 (0.48-1.16) | 0.72 (0.46-1.22) |
| A4 vs AD2   | 0.86 (0.72-1.03) | 0.85 (0.70-1.03) | 0.86 (0.71-1.05) | 0.77 (0.58-1.01) | 0.77 (0.58-1.00) | 0.77 (0.56-1.03) | 0.93 (0.54-1.51) | 0.93 (0.54-1.51) | 0.95 (0.52-1.60) |
| A4 vs TC    | 0.97 (0.85-1.11) | 0.97 (0.85-1.11) | 0.97 (0.84-1.12) | 0.95 (0.78-1.18) | 0.94 (0.78-1.19) | 0.95 (0.76-1.22) | 0.78 (0.54-1.06) | 0.77 (0.54-1.06) | 0.75 (0.51-1.09) |
| A4 vs A+TC  | 0.90 (0.38-2.63) | 0.94 (0.44-2.63) | 0.91 (0.40-2.56) | 0.65 (0.24-2.44) | 0.65 (0.26-2.22) | 0.65 (0.25-2.27) | 0.67 (0.23-2.86) | 0.66 (0.23-2.94) | 0.64 (0.21-2.94) |
| A4 vs C     | 0.90 (0.76-1.09) | 0.90 (0.75-1.08) | 0.91 (0.75-1.12) | 0.83 (0.63-1.15) | 0.83 (0.63-1.16) | 0.84 (0.61-1.22) | 0.66 (0.43-1.12) | 0.66 (0.42-1.12) | 0.66 (0.40-1.22) |
| A4 vs A+C   | 0.85 (0.70-1.04) | 0.85 (0.70-1.03) | 0.85 (0.69-1.06) | 0.79 (0.59-1.08) | 0.79 (0.59-1.09) | 0.79 (0.57-1.12) | 1.92 (1.27-3.13) | 1.89 (1.25-3.13) | 1.92 (1.20-3.33) |
| A4 vs TF    | 0.98 (0.76-1.28) | 0.98 (0.75-1.28) | 0.97 (0.73-1.32) | 0.85 (0.57-1.30) | 0.85 (0.56-1.32) | 0.83 (0.54-1.35) | 0.44 (0.25-0.75) | 0.43 (0.25-0.74) | 0.41 (0.22-0.76) |
| A4 vs CL    | 0.69 (0.53-0.91) | 0.69 (0.53-0.90) | 0.68 (0.52-0.92) | 0.62 (0.44-0.88) | 0.61 (0.43-0.88) | 0.61 (0.42-0.91) | 0.44 (0.28-0.74) | 0.43 (0.28-0.75) | 0.44 (0.26-0.79) |
| A4 vs A+CL  | 1.15 (0.56-2.70) | 1.14 (0.55-2.78) | 1.19 (0.57-2.94) | 1.09 (0.47-3.33) | 1.08 (0.47-3.23) | 1.06 (0.44-3.45) | 0.55 (0.15-3.45) | 0.53 (0.13-3.57) | 0.58 (0.15-4.17) |
| AD1 vs AD2  | 0.98 (0.79-1.20) | 0.97 (0.78-1.21) | 0.98 (0.77-1.24) | 0.91 (0.63-1.25) | 0.91 (0.63-1.25) | 0.91 (0.60-1.30) | 1.27 (0.63-2.33) | 1.28 (0.62-2.34) | 1.31 (0.59-2.54) |
| AD1 vs TC   | 1.11 (0.91-1.34) | 1.11 (0.91-1.36) | 1.11 (0.88-1.38) | 1.14 (0.82-1.51) | 1.14 (0.82-1.52) | 1.14 (0.78-1.57) | 1.08 (0.63-1.65) | 1.08 (0.63-1.66) | 1.06 (0.57-1.70) |
| AD1 vs A+TC | 1.30 (0.43-2.98) | 1.34 (0.49-3.09) | 1.30 (0.44-3.02) | 1.06 (0.28-2.92) | 1.03 (0.29-2.68) | 1.05 (0.28-2.70) | 1.38 (0.30-4.04) | 1.38 (0.30-4.21) | 1.35 (0.27-4.14) |

**Supplementary appendix 9. Sensitivity to the choice of prior distribution.**

|              |                  |                  |                  |                  |                  |                  |                  |                  |                  |
|--------------|------------------|------------------|------------------|------------------|------------------|------------------|------------------|------------------|------------------|
| AD1 vs C     | 1.03 (0.93-1.16) | 1.03 (0.92-1.16) | 1.04 (0.90-1.20) | 1.00 (0.79-1.25) | 1.00 (0.79-1.26) | 1.00 (0.75-1.31) | 0.92 (0.68-1.27) | 0.92 (0.68-1.27) | 0.94 (0.64-1.38) |
| AD1 vs A+C   | 0.97 (0.83-1.13) | 0.97 (0.83-1.13) | 0.97 (0.81-1.16) | 0.95 (0.71-1.22) | 0.95 (0.71-1.22) | 0.95 (0.68-1.26) | 2.65 (1.95-3.68) | 2.65 (1.95-3.69) | 2.71 (1.85-3.97) |
| AD1 vs TF    | 1.14 (0.87-1.45) | 1.13 (0.87-1.45) | 1.13 (0.84-1.48) | 1.04 (0.65-1.54) | 1.04 (0.65-1.55) | 1.03 (0.60-1.60) | 0.63 (0.34-0.96) | 0.62 (0.34-0.96) | 0.61 (0.30-1.00) |
| AD1 vs CL    | 0.80 (0.62-1.01) | 0.80 (0.62-1.02) | 0.80 (0.60-1.02) | 0.75 (0.52-1.02) | 0.74 (0.51-1.02) | 0.74 (0.49-1.04) | 0.62 (0.40-0.91) | 0.62 (0.40-0.92) | 0.62 (0.38-0.96) |
| AD1 vs A+CL  | 1.54 (0.65-3.04) | 1.52 (0.63-3.10) | 1.60 (0.65-3.25) | 1.65 (0.56-3.84) | 1.61 (0.55-3.72) | 1.64 (0.53-3.98) | 1.39 (0.20-4.42) | 1.44 (0.18-4.60) | 1.57 (0.21-5.45) |
| AD2 vs TC    | 1.14 (0.92-1.41) | 1.14 (0.92-1.43) | 1.12 (0.90-1.43) | 1.23 (0.91-1.72) | 1.23 (0.91-1.75) | 1.23 (0.87-1.82) | 0.83 (0.46-1.56) | 0.83 (0.46-1.59) | 0.79 (0.41-1.61) |
| AD2 vs A+TC  | 1.05 (0.45-3.13) | 1.10 (0.51-3.23) | 1.05 (0.46-3.03) | 0.85 (0.31-3.23) | 0.85 (0.33-3.03) | 0.85 (0.32-3.03) | 0.72 (0.23-3.57) | 0.71 (0.23-3.57) | 0.67 (0.21-3.57) |
| AD2 vs C     | 1.05 (0.85-1.32) | 1.05 (0.85-1.32) | 1.05 (0.83-1.37) | 1.09 (0.78-1.61) | 1.09 (0.78-1.61) | 1.10 (0.75-1.72) | 0.71 (0.38-1.52) | 0.71 (0.38-1.52) | 0.70 (0.35-1.64) |
| AD2 vs A+C   | 0.99 (0.79-1.27) | 0.99 (0.79-1.25) | 0.98 (0.76-1.28) | 1.03 (0.74-1.52) | 1.04 (0.73-1.52) | 1.03 (0.69-1.59) | 2.04 (1.12-4.35) | 2.04 (1.11-4.35) | 2.04 (1.04-4.55) |
| AD2 vs TF    | 1.15 (0.85-1.56) | 1.15 (0.85-1.54) | 1.12 (0.82-1.59) | 1.11 (0.71-1.79) | 1.11 (0.70-1.82) | 1.09 (0.67-1.89) | 0.47 (0.23-1.01) | 0.47 (0.23-1.02) | 0.43 (0.20-1.04) |
| AD2 vs CL    | 0.81 (0.61-1.09) | 0.81 (0.60-1.09) | 0.79 (0.59-1.10) | 0.81 (0.55-1.22) | 0.80 (0.54-1.22) | 0.79 (0.52-1.27) | 0.47 (0.25-1.01) | 0.47 (0.25-1.02) | 0.46 (0.23-1.06) |
| AD2 vs A+CL  | 1.35 (0.66-3.23) | 1.33 (0.64-3.33) | 1.37 (0.65-3.45) | 1.43 (0.61-4.35) | 1.41 (0.60-4.35) | 1.39 (0.56-4.55) | 0.60 (0.15-4.17) | 0.57 (0.14-4.35) | 0.62 (0.15-5.00) |
| TC vs A+TC   | 1.17 (0.40-2.66) | 1.20 (0.46-2.72) | 1.17 (0.41-2.63) | 0.93 (0.26-2.46) | 0.91 (0.27-2.28) | 0.93 (0.27-2.29) | 1.28 (0.31-3.59) | 1.27 (0.31-3.65) | 1.28 (0.30-3.68) |
| TC vs C      | 0.93 (0.77-1.14) | 0.93 (0.76-1.14) | 0.93 (0.75-1.18) | 0.87 (0.65-1.22) | 0.88 (0.65-1.22) | 0.88 (0.63-1.28) | 0.84 (0.54-1.52) | 0.83 (0.53-1.52) | 0.87 (0.52-1.69) |
| TC vs A+C    | 0.87 (0.7-1.09)  | 0.87 (0.70-1.09) | 0.87 (0.69-1.11) | 0.83 (0.61-1.16) | 0.83 (0.6-1.16)  | 0.82 (0.58-1.20) | 2.44 (1.56-4.35) | 2.38 (1.54-4.35) | 2.50 (1.54-4.76) |
| TC vs TF     | 1.03 (0.76-1.34) | 1.03 (0.76-1.35) | 1.02 (0.74-1.38) | 0.93 (0.58-1.39) | 0.93 (0.57-1.40) | 0.92 (0.55-1.45) | 0.60 (0.32-1.00) | 0.60 (0.32-1.01) | 0.60 (0.29-1.08) |
| TC vs CL     | 0.71 (0.54-0.94) | 0.71 (0.54-0.94) | 0.70 (0.53-0.95) | 0.65 (0.45-0.95) | 0.64 (0.44-0.95) | 0.63 (0.43-0.97) | 0.56 (0.34-1.01) | 0.55 (0.34-1.02) | 0.57 (0.34-1.12) |
| TC vs A+CL   | 1.18 (0.58-2.78) | 1.16 (0.56-2.86) | 1.22 (0.59-3.03) | 1.14 (0.50-3.57) | 1.12 (0.49-3.33) | 1.11 (0.46-3.57) | 0.70 (0.18-4.35) | 0.67 (0.16-4.55) | 0.76 (0.20-5.88) |
| A+TC vs C    | 0.79 (0.35-2.38) | 0.77 (0.33-2.08) | 0.80 (0.34-2.33) | 0.93 (0.34-3.57) | 0.96 (0.37-3.45) | 0.94 (0.37-3.45) | 0.66 (0.22-3.13) | 0.66 (0.21-3.13) | 0.68 (0.22-3.57) |
| A+TC vs A+C  | 0.75 (0.32-2.22) | 0.72 (0.31-2.00) | 0.75 (0.32-2.17) | 0.88 (0.32-3.33) | 0.92 (0.35-3.23) | 0.88 (0.34-3.33) | 1.89 (0.65-9.09) | 1.89 (0.62-9.09) | 1.96 (0.64-10.0) |
| A+TC vs TF   | 1.11 (0.38-2.68) | 1.06 (0.36-2.36) | 1.10 (0.36-2.58) | 1.36 (0.33-3.77) | 1.36 (0.37-3.58) | 1.34 (0.35-3.66) | 0.69 (0.14-2.08) | 0.70 (0.14-2.09) | 0.71 (0.13-2.27) |
| A+TC vs CL   | 0.61 (0.27-1.85) | 0.59 (0.25-1.67) | 0.61 (0.26-1.82) | 0.69 (0.25-2.63) | 0.70 (0.27-2.56) | 0.68 (0.26-2.56) | 0.43 (0.14-2.13) | 0.43 (0.14-2.08) | 0.44 (0.14-2.33) |
| A+TC vs A+CL | 1.01 (0.58-4.17) | 0.97 (0.34-4.00) | 1.04 (0.36-4.55) | 1.23 (0.39-7.14) | 1.25 (0.40-6.67) | 1.20 (0.36-7.14) | 0.56 (0.13-6.67) | 0.52 (0.11-7.14) | 0.60 (0.13-8.33) |
| C vs A+C     | 0.94 (0.82-1.07) | 0.94 (0.82-1.07) | 0.94 (0.80-1.09) | 0.96 (0.73-1.20) | 0.96 (0.73-1.20) | 0.95 (0.69-1.24) | 2.90 (2.06-4.04) | 2.91 (2.06-4.08) | 2.94 (1.93-4.33) |
| C vs TF      | 1.10 (0.85-1.40) | 1.10 (0.85-1.39) | 1.09 (0.82-1.41) | 1.05 (0.65-1.56) | 1.05 (0.65-1.57) | 1.04 (0.60-1.63) | 0.69 (0.35-1.09) | 0.69 (0.35-1.09) | 0.66 (0.30-1.13) |

**Supplementary appendix 9. Sensitivity to the choice of prior distribution.**

|             |                  |                  |                  |                  |                  |                  |                  |                  |                  |
|-------------|------------------|------------------|------------------|------------------|------------------|------------------|------------------|------------------|------------------|
| C vs CL     | 0.77 (0.60-0.98) | 0.78 (0.59-0.99) | 0.77 (0.58-1.00) | 0.76 (0.51-1.05) | 0.75 (0.50-1.06) | 0.74 (0.47-1.08) | 0.68 (0.41-1.05) | 0.68 (0.41-1.05) | 0.68 (0.38-1.11) |
| C vs A+CL   | 1.49 (0.63-2.93) | 1.48 (0.61-3.01) | 1.54 (0.64-3.13) | 1.66 (0.57-3.86) | 1.61 (0.56-3.74) | 1.64 (0.53-4.00) | 1.53 (0.22-4.85) | 1.58 (0.20-5.03) | 1.71 (0.23-5.92) |
| A+C vs TF   | 1.17 (0.90-1.52) | 1.17 (0.89-1.50) | 1.16 (0.86-1.52) | 1.10 (0.72-1.60) | 1.10 (0.72-1.61) | 1.10 (0.68-1.68) | 0.24 (0.13-0.36) | 0.24 (0.13-0.36) | 0.23 (0.11-0.37) |
| A+C vs CL   | 0.81 (0.63-1.05) | 0.81 (0.63-1.06) | 0.81 (0.61-1.06) | 0.77 (0.55-1.10) | 0.76 (0.54-1.10) | 0.76 (0.52-1.14) | 0.23 (0.15-0.34) | 0.23 (0.15-0.35) | 0.22 (0.14-0.36) |
| A+C vs A+CL | 1.58 (0.67-3.11) | 1.57 (0.66-3.19) | 1.64 (0.69-3.28) | 1.73 (0.62-3.93) | 1.69 (0.61-3.82) | 1.73 (0.58-4.10) | 0.53 (0.08-1.66) | 0.54 (0.07-1.69) | 0.58 (0.08-1.95) |
| TF vs CL    | 0.69 (0.51-0.98) | 0.69 (0.51-0.98) | 0.69 (0.50-1.01) | 0.70 (0.45-1.15) | 0.70 (0.44-1.16) | 0.70 (0.43-1.22) | 0.96 (0.60-1.82) | 0.96 (0.60-1.85) | 1.00 (0.59-2.04) |
| TF vs A+CL  | 1.16 (0.56-2.78) | 1.14 (0.54-2.86) | 1.20 (0.57-3.03) | 1.25 (0.53-3.85) | 1.23 (0.52-3.85) | 1.23 (0.50-4.17) | 1.20 (0.31-7.69) | 1.16 (0.29-8.33) | 1.33 (0.34-10.0) |
| CL vs A+CL  | 1.96 (0.79-3.99) | 1.93 (0.78-4.06) | 2.04 (0.82-4.28) | 2.25 (0.74-5.39) | 2.21 (0.74-5.26) | 2.27 (0.71-5.63) | 2.32 (0.33-7.50) | 2.40 (0.29-7.74) | 2.61 (0.34-9.16) |

Random effects model was used; A, aspirin; D, dipyridamole; P, placebo; TF, triflusal; TC, ticlopidine; CL, cilostazol; C, clopidogrel; A1, aspirin 30-50 mg daily; A2, aspirin 75-162 mg daily; A3, aspirin 283-330 mg daily; A4, aspirin 500-1500 mg daily; AD1, aspirin 50 mg plus dipyridamole 400 mg daily; AD2, aspirin 990-1300 mg plus dipyridamole 150-300 mg daily; prior 1, Uniform(0,100) on standard deviation; prior 2, Uniform(0,1000) on variance; for all of the table cells, odds ratios <1 favor the right regimens.
