# Supplementary material for: Antiplatelet regimens in the long-term secondary prevention of transient ischaemic attack and ischaemic stroke: an updated network meta-analysis
Source: PubMed Central journal article supplement — BMJ Open. 2016 Mar 17;6(3):e009013. doi: 10.1136/bmjopen-2015-009013 (PMC4800132; doi:10.1136/bmjopen-2015-009013), 2016-03-17
Supplement: bmjopen-2015-009013supp_appendix13.pdf [file bmjopen-2015-009013supp_appendix13.pdf]

**Supplementary appendix 13. Discontinuation owing to adverse events.**

| <b>Data of discontinuation owing to adverse events</b> |               |     |    |    |                         |       |      |      |                               |      |     |     |
|--------------------------------------------------------|---------------|-----|----|----|-------------------------|-------|------|------|-------------------------------|------|-----|-----|
| Study                                                  | Interventions |     |    |    | Total included patients |       |      |      | Dropout due to adverse events |      |     |     |
|                                                        | t1            | t2  | t3 | t4 | n1                      | n2    | n3   | n4   | r1                            | r2   | r3  | r4  |
| 1977 AITIA                                             | P             | A4  | —  | —  | 157                     | 162   | —    | —    | 5                             | 9    | —   | —   |
| 1983 AICLA                                             | AD2           | P   | 13 | —  | 202                     | 204   | 198  | —    | 18                            | 6    | 17  | —   |
| 1983 Danish coop                                       | P             | A4  | —  | —  | 102                     | 101   | —    | —    | 12                            | 7    | —   | —   |
| 1985 ACCSG                                             | AD2           | A4  | —  | —  | 448                     | 442   | —    | —    | 87                            | 75   | —   | —   |
| 1987 Swedish Coop                                      | P             | A4  | —  | —  | 252                     | 253   | —    | —    | 20                            | 33   | —   | —   |
| 1989 CATS                                              | P             | TC  | —  | —  | 541                     | 531   | —    | —    | 15                            | 62   | —   | —   |
| 1989 TASS                                              | TC            | A4  | —  | —  | 1529                    | 1540  | —    | —    | 317                           | 222  | —   | —   |
| 1990 ESPS                                              | AD2           | P   | —  | —  | 1250                    | 1250  | —    | —    | 164                           | 84   | —   | —   |
| 1991 Dutch TIA                                         | A1            | A3  | —  | —  | 1555                    | 1576  | —    | —    | 75                            | 93   | —   | —   |
| 1991 SALT                                              | A2            | P   | —  | —  | 676                     | 684   | —    | —    | 17                            | 10   | —   | —   |
| 1991 UK-TIA                                            | P             | A3  | 13 | —  | 814                     | 806   | 815  | —    | 97                            | 106  | 160 | —   |
| 1996 ESPS2                                             | AD1           | D   | 8  | 11 | 1650                    | 1654  | 1649 | 1649 | 262                           | 249  | 127 | 141 |
| 2000 CSPP                                              | CL            | P   | —  | —  | 533                     | 534   | —    | —    | 70                            | 33   | —   | —   |
| 2003 AAASPS                                            | TC            | A4  | —  | —  | 902                     | 907   | —    | —    | 81                            | 71   | —   | —   |
| 2004 TAPIRSS                                           | TF            | A3  | —  | —  | 213                     | 216   | —    | —    | 5                             | 10   | —   | —   |
| 2006 ESPRIT                                            | A2            | AD1 | —  | —  | 1376                    | 1363  | —    | —    | 35                            | 255  | —   | —   |
| 2007 FASTER                                            | A2            | A+C | —  | —  | 194                     | 198   | —    | —    | 20                            | 17   | —   | —   |
| 2008 Fukuuchi                                          | C             | TC  | —  | —  | 573                     | 578   | —    | —    | 97                            | 154  | —   | —   |
| 2008 CASISP                                            | A2            | CL  | —  | —  | 359                     | 360   | —    | —    | 15                            | 25   | —   | —   |
| 2008 PRoFESS                                           | AD1           | C   | —  | —  | 10181                   | 10151 | —    | —    | 1650                          | 1069 | —   | —   |
| 2009 Uchiyama Phase IIIa                               | C             | TC  | —  | —  | 366                     | 345   | —    | —    | 37                            | 31   | —   | —   |
| 2010 CSPP2                                             | A2            | CL  | —  | —  | 1335                    | 1337  | —    | —    | 166                           | 267  | —   | —   |
| 2011 CAIST                                             | CL            | A3  | —  | —  | 231                     | 227   | —    | —    | 18                            | 11   | —   | —   |

**Supplementary appendix 13. Discontinuation owing to adverse events.**

---

---

|            |    |     |   |   |     |     |   |   |     |     |   |   |
|------------|----|-----|---|---|-----|-----|---|---|-----|-----|---|---|
| 2011 JASAP | A2 | AD1 | — | — | 639 | 652 | — | — | 142 | 172 | — | — |
|------------|----|-----|---|---|-----|-----|---|---|-----|-----|---|---|

---

A, aspirin; D, dipyridamole; P, placebo; TF, triflusal; TC, ticlopidine; CL, cilostazol; C, clopidogrel; A1, aspirin 30-50 mg daily; A2, aspirin 75-162 mg daily; A3, aspirin 283-330 mg daily; A4, aspirin 500-1500 mg daily; AD1, aspirin 50 mg plus dipyridamole 400 mg daily; AD2, aspirin 990-1300 mg plus dipyridamole 150-300 mg daily; t1, t2, t3, and t4, comparison arms of each study; n1, n2, n3, and n4, total included patients of each comparison arm; r1, r2, r3, and r4, dropout due to adverse events of each comparison arm.

Supplementary appendix 13. Discontinuation owing to adverse events.

Network meta-analysis for discontinuation due to adverse events. Regimens compared with placebo. ORs >1 favor placebo.

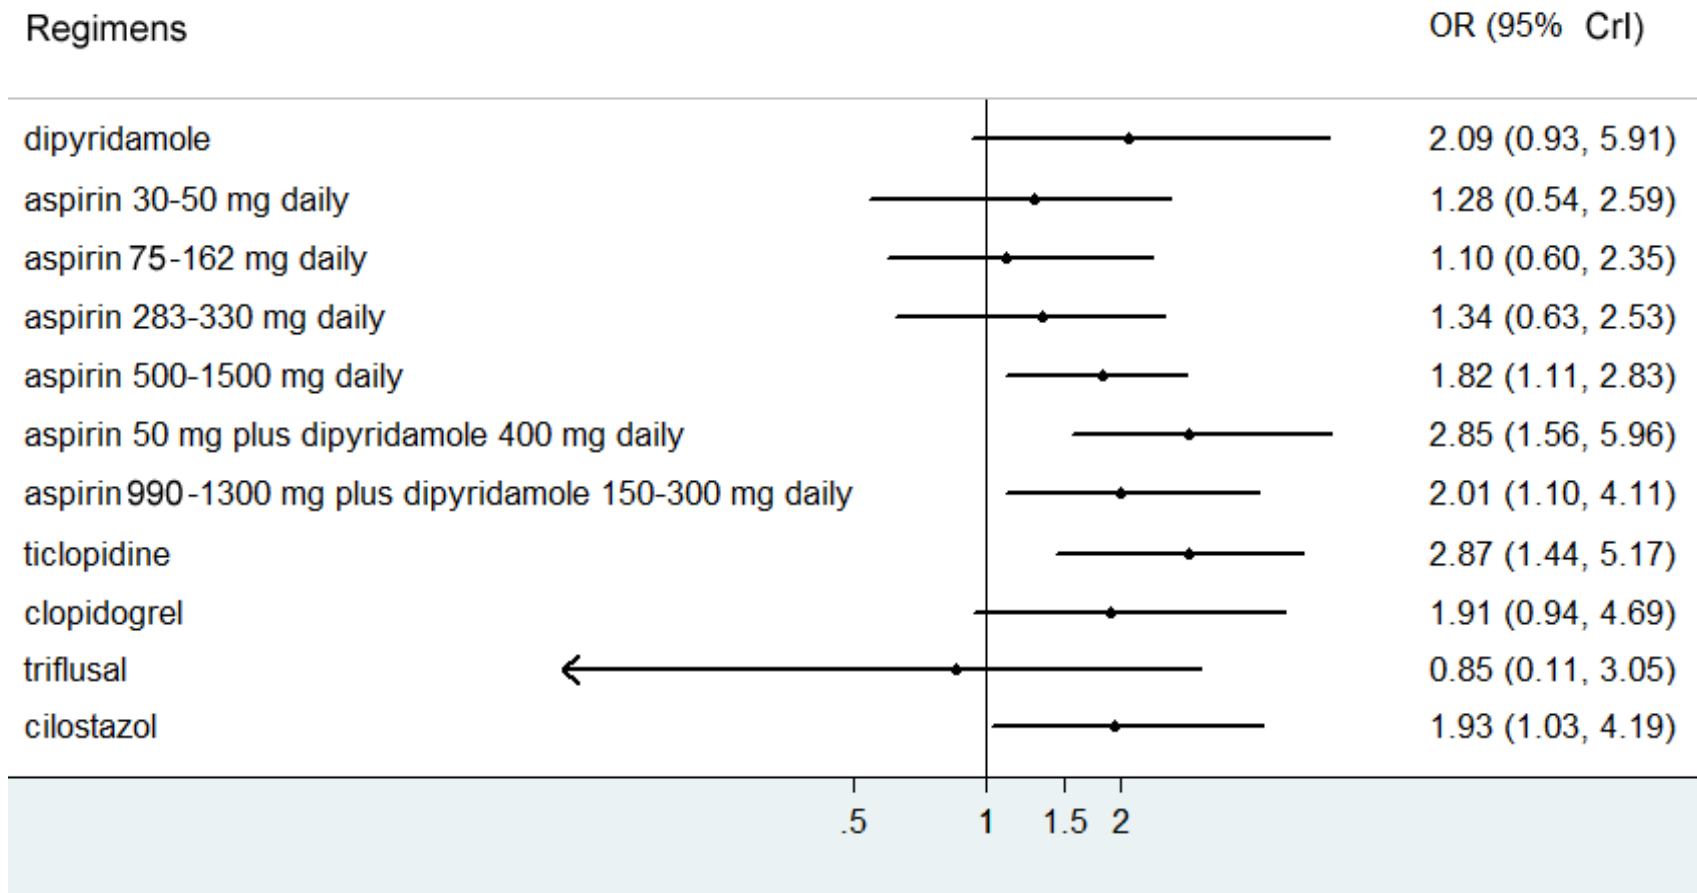

Supplementary appendix 13. Discontinuation owing to adverse events.

Network meta-analysis for discontinuation due to adverse events. Regimens compared with aspirin 75-162 mg daily. ORs >1 favor aspirin 75-162 mg daily.

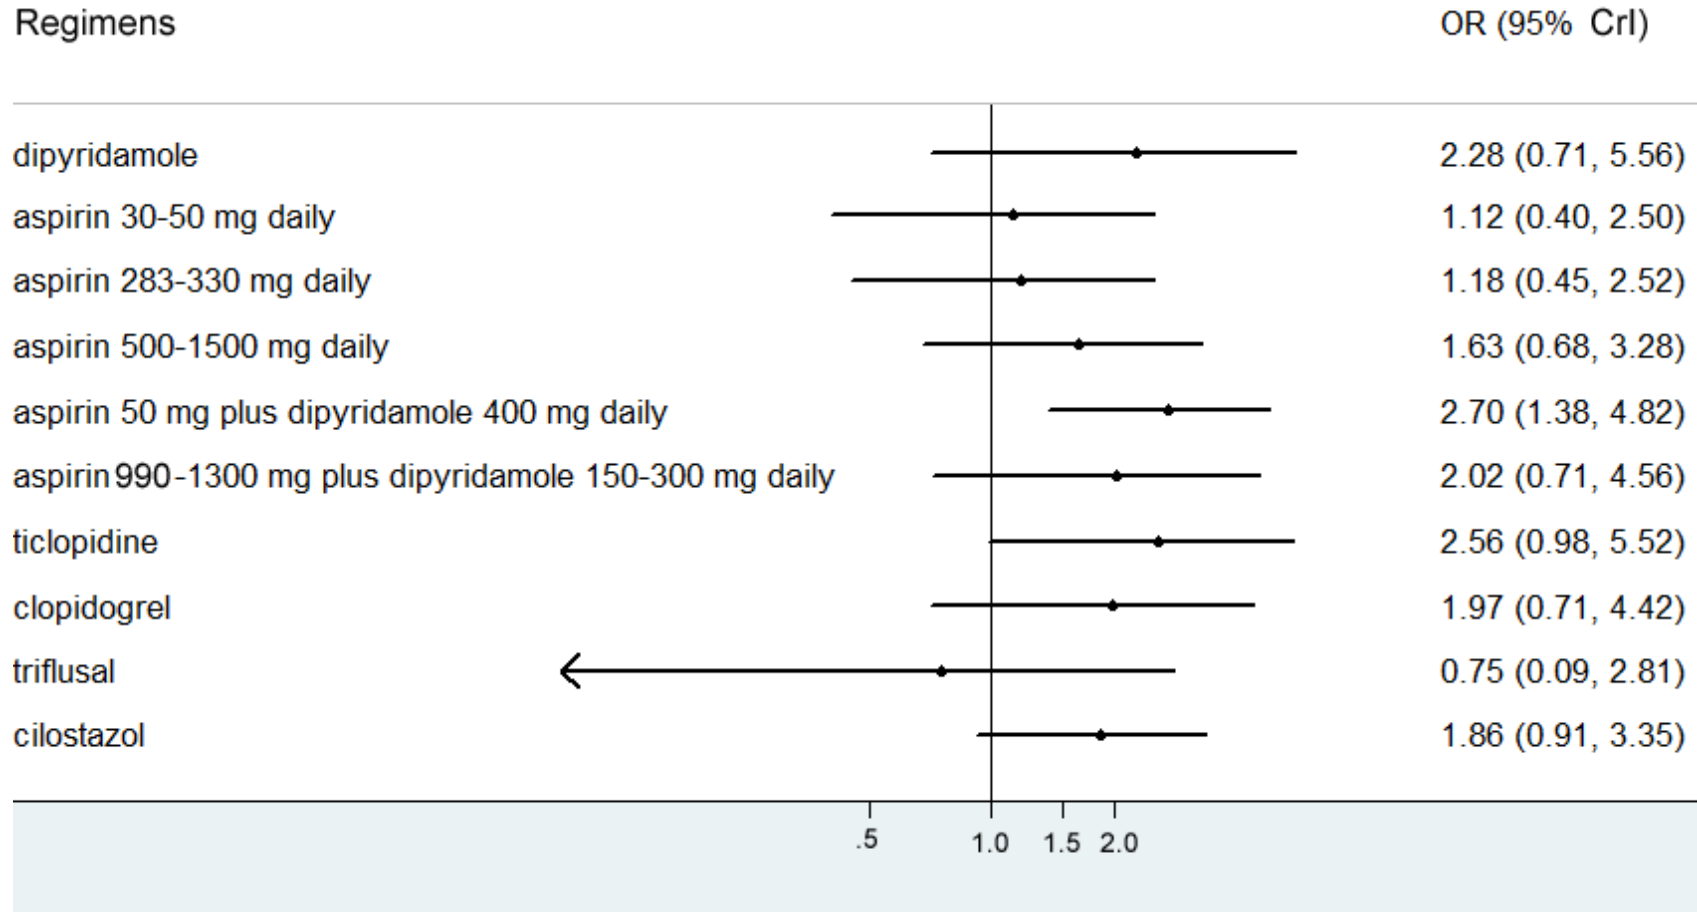

### Supplementary appendix 13. Discontinuation owing to adverse events.

---

#### Direct comparison for discontinuation due to adverse events.

| Direct comparisons                                                                  | OR(95% CI)       |
|-------------------------------------------------------------------------------------|------------------|
| Placebo vs Dipyridamole                                                             | 2.12(1.70-2.66)  |
| Placebo vs Aspirin 75-162 mg daily                                                  | 1.74(0.79-3.83)  |
| Placebo vs Aspirin 283-330 mg daily                                                 | 1.12(0.83-1.50)  |
| Placebo vs Aspirin 500-1500 mg daily                                                | 1.66(1.13-2.45)  |
| Placebo vs Aspirin 50 mg plus dipyridamole 400 mg daily                             | 2.26(1.81-2.83)  |
| Placebo vs Aspirin 990-1300 mg plus dipyridamole 150-300 mg daily                   | 2.17(1.66-2.83)  |
| Placebo vs Ticlopidine                                                              | 4.64(2.60-8.26)  |
| Placebo vs Cilostazol                                                               | 2.30(1.49-3.54)  |
| Dipyridamole vs Aspirin 30-50 mg daily                                              | 0.53(0.42-0.66)  |
| Dipyridamole vs Aspirin 50 mg plus dipyridamole 400 mg daily                        | 1.07(0.88-1.29)  |
| Aspirin 30-50 mg daily vs Aspirin 50 mg plus dipyridamole 400 mg daily              | 2.02(1.62-2.51)  |
| Aspirin 75-162 mg daily vs Aspirin 50 mg plus dipyridamole 400 mg daily             | 3.31(0.47-23.17) |
| Aspirin 75-162 mg daily vs Aspirin plus clopidogrel                                 | 0.82(0.41-1.61)  |
| Aspirin 75-162 mg daily vs Cilostazol                                               | 1.75(1.43-2.14)  |
| Aspirin 283-330 mg daily vs Aspirin 500-1500 mg daily                               | 1.61(1.23-2.11)  |
| Aspirin 283-330 mg daily vs Triflusal                                               | 0.50(0.17-1.47)  |
| Aspirin 283-330 mg daily vs Cilostazol                                              | 1.66(0.77-3.60)  |
| Aspirin 500-1500 mg daily vs Aspirin 990-1300 mg plus dipyridamole 150-300 mg daily | 1.18(0.84-1.66)  |
| Aspirin 500-1500 mg daily vs Ticlopidine                                            | 1.39(1.05-1.83)  |
| Aspirin 50 mg plus dipyridamole 400 mg daily vs Clopidogrel                         | 0.61(0.56-0.66)  |
| Ticlopidine vs Clopidogrel                                                          | 0.78(0.39-1.54)  |

Comparisons between regimens should be read from right to left. Odds ratio (OR) <1 favor the right regimens.
